# Supplementary material
Source: MDPI journal article supplement (https://www.mdpi.com/2220-9964/10/3/108)
Supplement: s1 [file s1]

SortKey,date,time,Feedback,Category,Sub-category,Type,ga:city,ga:country,ga:latitude,ga:longitude,place search,URL,len
1,8/28/20,08:49,"Planning design for personal property. I'm a GIS professional, & considered trying to do this myself -I'm glad I didn't. Thanks so much for this tool!",Map,Property,3DP,Summerville,United States,33.0185,-80.1757,,(not set),150
2,5/21/20,14:38,"We will use these model as suport information for an architectural design contest , called Premio Felix Candela , we are grateful with the developer",Design,Architecture,3DP,Mexico City,Mexico,19.4326,-99.1332,,(not set),148
3,4/5/20,12:03,"I am first year architecture student, Struggling with site model. We were asked to trace old map isocurves and then lift them at elevation, ( mess.",Education,College,3DP,Long Beach,United States,33.7701,-118.1937,,(not set),147
4,10/15/20,13:14,"its an iconic mountain where I live, and it's absolutely beautiful every day of the year. I'd like to print it out and have it in our motorhome",Map,Mountains,3DP,Wasilla,United States,61.5809,-149.4411,,trlat=61.50663311273711&trlon=-148.98029833681645&bllat=61.45379507474419&bllon=-149.10263567812504&DEM_name=JAXA/ALOS/AW3D30/V2_2&tilewidth=80&printres=0.2&ntilesx=1&ntilesy=1&DEMresolution=32.6&basethick=1&zscale=1.0&fileformat=STLb&maptype=roadmap&gamma=1&transp=35&hsazi=315&hselev=45&map_lat=61.475555600000014&map_lon=-149.03305560000004&map_zoom=11,143
5,1/23/20,14:12,"hobbyist woodworker using an xcarve. Interested to see if I can carve the Sutter Buttes (smallest moutain range in the world, my home town).",Crafts,Carving,CNC,Yuba City,United States,39.1404,-121.6169,,(not set),140
6,11/15/20,08:25,Testing this tech to see if my high school earth science students could use it for a project describing why a place looks the way it does...,Education,High School,3DP,Elma Center,United States,42.8298,-78.6361,"8271 Rohr Hill Rd, East Otto, NY 14729, USA",place=8271%20Rohr%20Hill%20Rd%2C%20East%20Otto%2C%20NY%2014729%2C%20USA&trlat=42.36656827527167&trlon=-78.66608879671337&bllat=42.34816093418302&bllon=-78.6909986953521&DEM_name=USGS/NED&tilewidth=80&printres=0.4&ntilesx=1&ntilesy=1&DEMresolution=10.26&basethick=1&zscale=1.0&fileformat=STLb&maptype=roadmap&gamma=1&transp=20&hsazi=315&hselev=45&map_lat=42.359268847767225&map_lon=-78.67858666137697&map_zoom=15,140
7,10/25/20,14:38,3D print model for fun... tried to download data from National map and do all the conversions myself and failed.. friend gave me this link.,Map,Map,3DP,Anchorage,United States,61.2181,-149.9003,,trlat=60.750425864209944&trlon=-147.29512818345896&bllat=60.60940870306028&bllon=-147.5294459699849&DEM_name=USGS/NED&tilewidth=140&printres=0.2&ntilesx=1&ntilesy=1&DEMresolution=18.29&basethick=3&zscale=1.0&fileformat=STLb&maptype=roadmap&gamma=1&transp=20&hsazi=315&hselev=45&map_lat=60.66923939769458&map_lon=-147.37733056956998&map_zoom=10,139
8,6/8/20,08:23,This is my local mountain range the Galtee/Ballyhoura mountains in the south of Ireland. I'm printing it for personal reference. Thank you,Map,Map,3DP,(not set),Ireland,0,0,,(not set),138
9,10/26/20,17:30,Taking a Land Survey Class at John Tyler Community College and would like to apply some of what I've learn in reference to the school.,Education,College,3DP,Richmond,United States,37.5407,-77.4361,,trlat=37.35037782003161&trlon=-77.4046306981926&bllat=37.34164383679829&bllon=-77.41179264329718&DEM_name=USGS/NED&tilewidth=80&printres=0.4&ntilesx=1&ntilesy=1&DEMresolution=3.17&basethick=1&zscale=1.0&fileformat=STLb&maptype=roadmap&gamma=1&transp=40&hsazi=315&hselev=45&map_lat=37.34599066480304&map_lon=-77.4062053531151&map_zoom=16,134
10,4/3/20,16:33,I'm testing out an STL processing workflow for use in Fusion 360(turning file into solid to be modified and manufactured),Design,3D Design,3DP,Seattle,United States,47.6062,-122.3321,,(not set),121
11,12/3/20,13:20,I grew up in North Jersey (New Jersey) and live in SE Texas now which is super flat. I miss the areas we used to explore.,Map,Outdoors,3DP,Bellaire,United States,29.7058,-95.4588,"Wanaque Reservoir, New Jersey, USA",place=Wanaque%20Reservoir%2C%20New%20Jersey%2C%20USA&trlat=41.16663169044206&trlon=-73.88775151679116&bllat=40.8557558921726&bllon=-74.9238209099491&DEM_name=USGS/NED&tilewidth=300&printres=0.4&ntilesx=1&ntilesy=1&DEMresolution=116.21&basethick=2&zscale=1.0&fileformat=STLb&maptype=roadmap&gamma=1&transp=20&hsazi=315&hselev=45&map_lat=41.23854880409861&map_lon=-75.16961609789884&map_zoom=10,121
12,11/20/20,20:45,Bought new rural property. Wanted to evaluate and visualize landscape for trail planning and possible cabin locations.,Map,Property,3DP,Lafayette,United States,40.4167,-86.8753,,trlat=40.7237430540179&trlon=-86.4772557921663&bllat=40.71586981008446&bllon=-86.4876439064813&DEM_name=USGS/NED&tilewidth=300&printres=0.4&ntilesx=1&ntilesy=1&DEMresolution=1.17&basethick=1&zscale=1.5&fileformat=STLb&maptype=roadmap&gamma=1&transp=40&hsazi=315&hselev=45&map_lat=40.71959970990075&map_lon=-86.48035870101585&map_zoom=15,118
14,9/6/20,20:45,testing input into Spatial.io for VR collaboration. Also we are Simtable - check us out for interactive gis sandtable,Design,3D Design,3DP,Santa Fe,United States,35.687,-105.9378,,(not set),117
13,11/23/19,17:07,for my wife's Earth science 11 class. trying to get it to show shading when viewed on solidworks bill@star-techno.com,Education,High School,3DP,Chilliwack,Canada,49.1579,-121.9515,,(not set),117
15,11/4/20,17:24,It is a gift my my in-laws who just sold their house they built and lived in for the last 20 years in this area.,Crafts,Gift,3DP,Wichita,United States,37.6872,-97.3301,,trlat=39.509221352224074&trlon=-77.87904878921509&bllat=39.486969053616455&bllon=-77.9147686607361&DEM_name=USGS/NED&tilewidth=120&printres=0.4&ntilesx=1&ntilesy=1&DEMresolution=10.24&basethick=1&zscale=1.0&fileformat=STLb&maptype=roadmap&gamma=1&transp=20&hsazi=315&hselev=45&map_lat=39.49279705416818&map_lon=-77.92100443809579&map_zoom=14,112
16,7/25/20,21:46,"I would like to build a 3D wall hanging or potentially bracket it, fill with clear resin and make into a table",Crafts,Wall Art,3DP,Auckland,New Zealand,-36.8485,174.7633,,(not set),110
17,11/15/20,08:32,Testing out to use with high school students for describing and determining why a place looks the way it does!,Education,High School,3DP,Elma Center,United States,42.8298,-78.6361,"2111 Girdle Rd, Elma, NY 14059, USA",place=2111%20Girdle%20Rd%2C%20Elma%2C%20NY%2014059%2C%20USA&trlat=42.83867913330185&trlon=-78.59679383829197&bllat=42.83222077160237&bllon=-78.60562244102321&DEM_name=USGS/NED&tilewidth=80&printres=0.4&ntilesx=1&ntilesy=1&DEMresolution=3.61&basethick=1&zscale=3&fileformat=STLb&maptype=roadmap&gamma=1&transp=20&hsazi=315&hselev=45&map_lat=42.837385636130875&map_lon=-78.60081117272338&map_zoom=16,110
19,7/7/20,11:29,Trying to import into Rhino for base terrain for an architecture project. Thanks for this excellent resource!,Design,Architecture,3DP,Seattle,United States,47.6062,-122.3321,,(not set),109
18,10/30/19,16:45,"3D print for use in a hands-on, 4th grade science unit about flood and drought, looking at a local watershed.",Education,Elementary School,3DP,Spearfish,United States,44.4908,-103.8594,,(not set),109
20,2/9/20,13:41,"3d cnc carve, puget sound filled with blue epoxy, then top entire carve with clear epoxy, square. bar top.",Crafts,Furniture,CNC,Olympia,United States,47.0379,-122.9007,,(not set),106
21,7/8/20,19:18,This is going to be a gift for a friend. Thank you for making this opensource and free for all to use!,Misc,Personal,3DP,Petaluma,United States,38.2324,-122.6367,,(not set),102
22,11/19/19,15:48,"Personal use (I've always wanted so much 3D maps of my mountains, it feels like a dream coming true!)",Map,Mountains,3DP,Treviso,Italy,45.6669,12.243,,(not set),101
23,6/4/20,17:10,It's my home. I'm looking into doing terrain printing for a friend. Figured I'd try my house first,Map,Property,3DP,Mesquite,United States,32.7668,-96.5992,,(not set),98
24,7/10/20,08:23,https://maker-tutorials.com/3d-landkarten-3d-drucker-erstellen-topographische-karte-miniatur-berg/,Map,Instructional,3DP,Mannheim,Germany,49.4875,8.466,,(not set),98
25,12/19/19,17:34,3d printing maps for exploring the White River for visually impaired folks in northwest arkansas,Education,BVI,3DP,Rogers,United States,36.332,-94.1185,,(not set),96
26,2/8/20,20:02,Middle school 3D printing class example. Students will each export and print their own terrain.,Education,Middle School,3DP,Harrisonburg,United States,38.4496,-78.8689,,(not set),95
27,1/11/20,15:13,"Understand land, easements, and possible building sites. Considering printing to a 3D printer.",Design,Architecture,3DP,Kirkland,United States,47.6769,-122.206,,(not set),94
28,1/31/20,10:05,"For a museum to illustrate how increased tides will effect the waterfront area in Kingston, NY",Education,Museum,3DP,New Paltz,United States,41.7476,-74.0868,,(not set),94
29,1/28/20,00:29,"3d printing topography of Portland as a gift for my brother, thanks for making this possible!",Crafts,Gift,3DP,Olympia,United States,47.0379,-122.9007,,(not set),93
30,11/15/20,06:49,"Gift for a ''randonner"" someone who love to walk on every moutain...... i guess Sorry french",Crafts,Gift,3DP,Neuville-sur-Saone,France,45.8761,4.841,"Lac d'Aiguebelette, France",place=Lac%20d%27Aiguebelette%2C%20France&trlat=45.842353459560925&trlon=6.1518578213455655&bllat=45.32192471596457&bllon=5.4082493466140935&DEM_name=USGS/NED&tilewidth=80&printres=0.4&ntilesx=1&ntilesy=1&DEMresolution=290.17&basethick=1&zscale=1.0&fileformat=STLb&maptype=roadmap&gamma=1&transp=20&hsazi=315&hselev=45&map_lat=45.718001535405946&map_lon=5.692486229022844&map_zoom=10,92
31,12/7/19,07:59,to create a gift of someones property as they are moving and will never be back to it again,Crafts,Gift,3DP,Dublin,Ireland,53.3498,-6.2603,,(not set),91
32,9/30/20,18:04,to have in my house our local mountain range and to show people how technology is evolving,Map,Mountains,3DP,Albuquerque,United States,35.0844,-106.6504,,(not set),90
33,7/17/20,23:23,for my dads distract so ist can help him describe wehre fires are located in his distract,Design,Architecture,3DP,Whitefish,United States,48.4106,-114.3353,,(not set),89
34,8/24/20,16:59,visualizing a building design within the context of the surrounding terrain in Nashville.,Design,3D Design,3DP,Cedar Park,United States,30.5052,-97.8203,,(not set),89
35,11/22/19,11:48,Exploring making a terrain model for my wife's Geology 11 class. This is our local area.,Education,High School,3DP,Chilliwack,Canada,49.1579,-121.9515,,(not set),88
37,11/30/20,12:28,Model for my high school science class. To see the ancient lake shore in our home town.,Education,High School,3DP,Rochester,United States,43.1566,-77.6088,,trlat=43.218264854913265&trlon=-77.67788911494283&bllat=43.20327208046187&bllon=-77.72163415583637&DEM_name=USGS/NED&tilewidth=180&printres=0.35&ntilesx=1&ntilesy=1&DEMresolution=6.91&basethick=0.5&zscale=4&fileformat=STLb&maptype=roadmap&gamma=1&transp=60&hsazi=180&hselev=45&map_lat=43.20755891669415&map_lon=-77.6974012914565&map_zoom=14,87
36,12/9/19,20:21,map of ironman florida I did a few years ago. I want to CNC a 3D map of the race course,Recreation,Sports,CNC,Martinsville,United States,39.4278,-86.4283,,(not set),87
38,12/14/19,02:38,"I'm Building a map, in the back are neopixels and so you can see where each Country is",Design,3D Design,3DP,Pfronten,Germany,47.5766,10.5264,,(not set),86
39,4/6/20,07:15,3D model of terrain and antourage of a building in an architecture project. Thank you!,Design,Architecture,3DP,Cluj-Napoca,Romania,46.7712,23.6236,,(not set),86
40,10/26/20,17:11,To CNC surface area of family Farm in Colombia S.A. for a Christmas Gift to relatives,Crafts,Gift,CNC,Richmond,United States,37.5407,-77.4361,,trlat=7.69651485574966&trlon=-72.58019387277993&bllat=7.589839434272273&bllon=-72.6579466417733&DEM_name=JAXA/ALOS/AW3D30/V2_2&tilewidth=80&printres=0.4&ntilesx=1&ntilesy=1&DEMresolution=42.9&basethick=1&zscale=1.0&fileformat=STLb&maptype=roadmap&gamma=1&transp=40&hsazi=315&hselev=45&map_lat=7.643344968508758&map_lon=-72.62605955818746&map_zoom=13,85
42,11/24/20,00:49,"friend moving to Nampa area of Idaho in 2021, sign for new home.(better resolution)",Crafts,Gift,3DP,Stockton,United States,37.9577,-121.2908,,trlat=43.740518870749604&trlon=-116.45042234214084&bllat=43.3972409933731&bllon=-116.83535296117948&DEM_name=USGS/NED&tilewidth=80&printres=0.4&ntilesx=1&ntilesy=1&DEMresolution=155.48&basethick=3&zscale=1.5&fileformat=STLb&maptype=roadmap&gamma=1&transp=10&hsazi=90&hselev=45&map_lat=43.49974050509153&map_lon=-116.61576515410157&map_zoom=11,83
41,8/24/20,11:47,"Partida Colina del Sol, 12A, 03710 Calpe, Alicante, Hispaania - 3d model tekstuur 1",Map,Map,3DP,(not set),Spain,0,0,,(not set),83
43,4/18/20,15:32,Just a test. I work there and thinking about printing this for a few of my bosses.,Crafts,Gift,3DP,Bowling Green,United States,36.9685,-86.4808,,(not set),82
44,12/13/20,15:17,Gift for friend who summitted this mountain range 11 times in a row---160 miles!!,Crafts,Gift,3DP,Spanish Fork,United States,40.115,-111.6549,,trlat=40.47314943269318&trlon=-111.55677934951783&bllat=40.3146957377949&bllon=-111.74888273544313&DEM_name=USGS/NED&tilewidth=80&printres=0.4&ntilesx=1&ntilesy=1&DEMresolution=81.55&basethick=1&zscale=1.0&fileformat=STLb&maptype=roadmap&gamma=1&transp=20&hsazi=315&hselev=45&map_lat=40.422504094649426&map_lon=-111.66898957002162&map_zoom=12,81
46,10/14/20,12:45,Just for fun. I hiked this area with a buddy and im thinking of this for a gift.,Crafts,Gift,3DP,Getzville,United States,43.0233,-78.7681,,(not set),80
47,11/2/20,07:55,To be submerged in water for an underwater photography project using an aquarium,Design,3D Design,3DP,Marseille,France,43.2965,5.3698,"Gangotri Glacier, Uttarakhand",place=Gangotri%20Glacier%2C%20Uttarakhand&trlat=44.746076744164014&trlon=-107.89859672851563&bllat=44.45273016368441&bllon=-108.33530327148438&DEM_name=USGS/NED&tilewidth=80&printres=0.4&ntilesx=1&ntilesy=1&DEMresolution=173.36&basethick=1&zscale=1.0&fileformat=STLb&maptype=roadmap&gamma=1&transp=20&hsazi=315&hselev=45&map_lat=30.80636088168337&map_lon=79.23396301044487&map_zoom=12,80
45,2/24/20,21:05,i lived in alaska and id like to show my teachers what the mountains looked like,Education,High School,3DP,League City,United States,29.5075,-95.0949,,(not set),80
48,8/30/20,16:58,My property to teach my kids the boundaries and the land. A 3D map so to speak.,Map,Property,3DP,Milwaukee,United States,43.0389,-87.9065,,(not set),79
49,11/24/19,09:13,CNC milling a relief map of Alpe D'Huez as a Christmas present for my husband,Crafts,Gift,CNC,Darmstadt,Germany,49.8728,8.6512,,(not set),77
50,10/7/19,08:49,Thank you! I want to print souvenirs for my friends the get on Elbrus summit,Crafts,Gift,3DP,Pyatigorsk,Russia,44.0499,43.0396,,(not set),76
52,6/28/20,19:43,CNC woodworking for my Aunt and Uncle who sailed there when they were young,Crafts,Gift,CNC,San Francisco,United States,37.7749,-122.4194,,(not set),75
53,9/5/20,19:12,Anniversary gift for my wife. The area is where we hiked for our honeymoon.,Crafts,Gift,3DP,Falmouth,United States,41.5532,-70.6086,,(not set),75
51,2/3/20,10:59,Testing for carving a model of the Philmont Scout Camp located in this area,Recreation,Camping,CNC,Boise,United States,43.615,-116.2023,,(not set),75
56,11/18/20,21:53,"Present for wife and mother-in-law, 3d print of their ancestors home town",Crafts,Gift,3DP,Seattle,United States,47.6062,-122.3321,"Culnacraig, Ullapool IV26 2YL, UK",place=Culnacraig%2C%20Ullapool%20IV26%202YL%2C%20UK&trlat=57.99782796050857&trlon=-5.24331542134284&bllat=57.96765988601113&bllon=-5.324765168428424&DEM_name=USGS/NED&tilewidth=80&printres=0.4&ntilesx=1&ntilesy=1&DEMresolution=24.09&basethick=1&zscale=1.0&fileformat=STLb&maptype=roadmap&gamma=1&transp=20&hsazi=315&hselev=45&map_lat=57.96099958127719&map_lon=-5.276401363611218&map_zoom=13,73
55,11/14/20,21:17,"Local interest for hiking and biking planning and visualization , private",Recreation,Hiking,3DP,Dortmund,Germany,51.5136,7.4653,"Dortmund, Deutschland",place=Dortmund%2C%20Deutschland&trlat=51.52235176866402&trlon=7.610007587855199&bllat=51.45681278381115&bllon=7.489934030955201&DEM_name=USGS/NED&tilewidth=80&printres=0.4&ntilesx=1&ntilesy=1&DEMresolution=41.7&basethick=1&zscale=1.0&fileformat=STLb&maptype=roadmap&gamma=1&transp=20&hsazi=315&hselev=45&map_lat=51.49508529575458&map_lon=7.553706857939901&map_zoom=12,73
57,5/21/20,12:08,unreal engine 4 tutorial project. Im studying how to use geo data in ue4,Design,Video Game,3DP,Barnaul,Russia,53.3548,83.7698,,(not set),72
59,4/19/20,12:36,I use these models to cut out landscapes out of wood with a CNC machine,Crafts,Carving,CNC,Tigard,United States,45.4187,-122.7873,,(not set),71
60,5/10/20,05:10,"A Nice model of my area, im going to add roads and rivers :-) Thankssss",Map,Neighborhood,3DP,(not set),United Kingdom,0,0,,(not set),71
58,11/12/19,18:27,I print ski resorts so you can see the mountain from a new perspective!,Recreation,Ski,3DP,Denver,United States,39.7392,-104.9902,,(not set),71
61,4/27/20,13:21,"Teaching my kids their surrounds, way to svhool, beach, woods we visit",Map,Neighborhood,3DP,Odder,Denmark,55.9757,10.15,,(not set),70
63,3/25/20,08:24,privater Versuch f�_r die Zugspitze und Umgebung. Bin gespannt. Rainer,Map,Mountains,3DP,Munich,Germany,48.1351,11.582,,(not set),69
62,9/17/19,11:19,Enjoyment. Its nice to see an update for this! Keep up the goodwork !,Misc,Personal,3DP,Vancouver,United States,45.6272,-122.6727,,(not set),69
64,4/13/20,08:46,Personnal use to teach some stuff to kids during Covid 19 confinment,Education,Teaching,3DP,(not set),France,44.7545,-0.4875,,(not set),68
65,9/30/19,15:33,make a terrain map of Long Island where i am from to put on my wall,Crafts,Wall Art,3DP,Hicksville,United States,40.7684,-73.5251,,(not set),67
66,7/26/20,14:36,Seeing if I can put my favorite terrain on the back of a phone case,Misc,Personal,3DP,Mesa,United States,33.4152,-111.8315,,(not set),67
67,10/28/20,01:25,To see how your program is working and if it work for South Africa.,Misc,Personal,3DP,Bloemfontein,South Africa,-29.0852,26.1596,,trlat=-29.14704246351847&trlon=26.201267964366107&bllat=-29.149853506574022&bllon=26.197753219981077&DEM_name=MERIT/DEM/v1_0_3&tilewidth=80&printres=0.4&ntilesx=1&ntilesy=1&DEMresolution=1.71&basethick=1&zscale=1.0&fileformat=STLb&maptype=roadmap&gamma=1&transp=20&hsazi=360&hselev=45&map_lat=-29.14844800667872&map_lon=26.199510592173592&map_zoom=18,67
68,2/22/20,20:26,3D Wood Carving into a desk top and back filling with epoxy resin,Crafts,Carving,CNC,Youngsville,United States,30.0996,-91.9901,,(not set),65
69,8/30/20,09:54,"A Group fellow asked for a 3D model of Brazil, for a school work.",Education,Education,3DP,Lagoa Santa,Brazil,-19.6303,-43.8983,,(not set),65
70,12/11/20,15:43,beginning to learn what is possible using data-driven 3D printing,Test,Test,3DP,Washington,United States,38.9072,-77.0369,"12302A Green Valley Rd, Union Bridge, MD 21791, USA",place=12302A%20Green%20Valley%20Rd%2C%20Union%20Bridge%2C%20MD%2021791%2C%20USA&trlat=44.70414775502857&trlon=-107.97013087972701&bllat=44.495069039123976&bllon=-108.263769120273&DEM_name=USGS/NED&tilewidth=80&printres=0.4&ntilesx=1&ntilesy=1&DEMresolution=116.57&basethick=1&zscale=1.0&fileformat=STLb&maptype=roadmap&gamma=1&transp=20&hsazi=315&hselev=45&map_lat=39.55202991311495&map_lon=-77.18858395000001&map_zoom=17,65
72,5/23/20,14:34,"Print off, finish and paint to make a 3d map to hang on the wall",Crafts,Wall Art,3DP,Gypsum,United States,39.6469,-106.9517,,(not set),64
71,1/10/20,08:58,Don Haas here - showing it off to students in AMNH's MAT program,Education,College,3DP,New York,United States,40.7128,-74.006,,(not set),64
73,11/10/20,07:09,To outline an area of Roman settlement in the early 20th century,Research,History,3DP,Perth,United Kingdom,56.395,-3.4308,,trlat=56.79616972640581&trlon=-2.8727052525448338&bllat=56.14763838631999&bllon=-4.064092429058492&DEM_name=USGS/NED&tilewidth=80&printres=0.4&ntilesx=1&ntilesy=1&DEMresolution=367.13&basethick=1&zscale=1.0&fileformat=STLb&maptype=roadmap&gamma=1&transp=20&hsazi=315&hselev=45&map_lat=56.701553947716235&map_lon=-3.46387286863008&map_zoom=9,64
78,9/5/20,17:48,"for fun, trying to make wall art of the city i live in. Thanks!",Crafts,Wall Art,3DP,San Diego,United States,32.7157,-117.1611,,(not set),63
76,3/1/20,00:27,trying to make an interactive geographycal map in unreal engine,Design,3D Design,3DP,Bota,Malaysia,4.3496,100.9296,,(not set),63
74,11/13/19,11:02,"this is my home country, i am teacher, model using in the class",Education,Teaching,3DP,(not set),Germany,0,0,,(not set),63
75,1/13/20,21:58,Display of a backpacking route to share with friends and family,Recreation,Camping,3DP,Colorado Springs,United States,38.8339,-104.8214,,(not set),63
77,7/12/20,20:39,Just a personal print to map hikes we do in the Tetons. Thanks!,Recreation,Hiking,3DP,Rexburg,United States,43.8231,-111.7924,,(not set),63
79,10/14/19,19:34,Hola! Imprimos modelos por recreaci�_n. Soy apasionado del MTB.,Map,Outdoors,3DP,Cordoba,Argentina,-31.4201,-64.1888,,(not set),62
80,5/23/20,19:52,3D printing Kauai island since we can't travel there currently,Map,Map,3DP,Longmont,United States,40.1672,-105.1019,,(not set),62
81,7/19/20,10:48,Gift for father-in-law geologist at Illinois State University,Crafts,Gift,3DP,Fairbury,United States,40.7473,-88.5148,,(not set),61
83,7/4/20,01:48,birthday gift for the grand son of that mountaind disciverer,Crafts,Gift,3DP,San Martin de los Andes,Argentina,-40.1572,-71.3524,,(not set),60
82,2/7/20,08:44,"Fun! Also, for a class in which we are learning 3d printing.",Education,Education,3DP,Blacksburg,United States,37.2296,-80.4139,,(not set),60
84,9/24/19,09:35,"Thank You so much , im using this data to study 3d printing",Test,Test,3DP,Pune,India,18.5204,73.8567,,(not set),59
86,3/11/20,21:23,cnc topo map of sugarbowl for girlfriends anniversary gift,Crafts,Gift,CNC,Davis,United States,38.5449,-121.7405,,(not set),58
85,12/10/19,17:52,This will be a prototype for making an educaitonal display,Education,Museum,3DP,Boulder,United States,40.015,-105.2705,,(not set),58
87,11/30/20,09:56,"fun, its a holiday area I've been several times already ..",Map,Outdoors,3DP,Frankenthal,Germany,49.5432,8.3512,,trlat=37.56997382951088&trlon=-1.2975213474750547&bllat=37.56017683643381&bllon=-1.3198453731060056&DEM_name=USGS/NED&tilewidth=80&printres=0.4&ntilesx=1&ntilesy=1&DEMresolution=9.86&basethick=1&zscale=1.0&fileformat=STLb&maptype=hybrid&gamma=1&transp=100&hsazi=315&hselev=45&map_lat=37.56497366039063&map_lon=-1.3054110652923612&map_zoom=16,58
88,11/27/19,12:19,To print a model of this place where we were with friends,Map,Map,3DP,Ufa,Russia,54.7388,55.9721,,(not set),57
89,6/16/20,14:47,Trying to get a realistic model to plan for some climbing,Recreation,Hiking,3DP,Teresina,Brazil,-5.092,-42.8038,,(not set),57
91,7/13/20,11:52,making a 3d model of the area around my house with a cnc,Crafts,Carving,CNC,Albuquerque,United States,35.0844,-106.6504,,(not set),56
92,11/24/20,00:28,"friend is moving to Idaho in 2021, sign for his new home",Crafts,Gift,3DP,Stockton,United States,37.9577,-121.2908,,trlat=43.740518870749604&trlon=-116.45042234214084&bllat=43.3972409933731&bllon=-116.83535296117948&DEM_name=USGS/NED&tilewidth=80&printres=0.4&ntilesx=1&ntilesy=1&DEMresolution=155.48&basethick=1&zscale=1.0&fileformat=STLb&maptype=roadmap&gamma=1&transp=10&hsazi=315&hselev=45&map_lat=43.68126495296313&map_lon=-116.61576515410157&map_zoom=11,56
90,12/1/19,13:57,teaching oceanography course: section on coastal geology,Education,College,3DP,Flagstaff,United States,35.1983,-111.6513,,(not set),56
93,11/22/19,11:37,CNC Mill a mountain range to give to mom for christmas!,Crafts,Gift,CNC,Salt Lake City,United States,40.7608,-111.891,,(not set),55
96,12/13/20,23:04,A gift for a friend who is a hiker and geography major.,Crafts,Gift,3DP,Escondido,United States,33.1192,-117.0864,,trlat=36.701266950815295&trlon=-118.20024629898072&bllat=36.56020433756961&bllon=-118.4568943626404&DEM_name=USGS/NED&tilewidth=160&printres=0.4&ntilesx=1&ntilesy=1&DEMresolution=57.39&basethick=1&zscale=1.0&fileformat=STLb&maptype=roadmap&gamma=1&transp=10&hsazi=315&hselev=45&map_lat=36.716004795889134&map_lon=-118.43088545104447&map_zoom=11,55
95,8/6/20,17:00,"Hobby for Gettysburg Campaign, personal use w my father",Recreation,Gaming,3DP,Lake Ronkonkoma,United States,40.8321,-73.1054,,(not set),55
94,2/21/20,12:36,in this moment i am testing your programm. good idea ;),Test,Test,3DP,Paderborn,Germany,51.7189,8.7575,,(not set),55
97,12/10/19,03:19,reseach in geogrphical data types and elastic displays,Education,College,3DP,Dresden,Germany,51.0504,13.7373,,(not set),54
98,12/12/19,00:35,tangible maps for daughters kindergarden class can use,Education,Elementary School,3DP,Federal Way,United States,47.3223,-122.3126,,(not set),54
99,1/2/20,09:34,i use the model to print a giant card from Switzerland,Map,Country,3DP,St. Gallen,Switzerland,47.4245,9.3767,,(not set),54
105,10/23/20,10:22,Fine Arts project dealing with geography and mapping.,Design,Art,3DP,Missoula,United States,46.8721,-113.994,missoula,place=missoula&trlat=47.018814367108675&trlon=-113.76937428247528&bllat=46.718373007134666&bllon=-114.20241513979033&DEM_name=USGS/NED&tilewidth=180&printres=0.4&ntilesx=1&ntilesy=1&DEMresolution=73.37&basethick=1&zscale=1.0&fileformat=STLb&maptype=roadmap&gamma=1&transp=20&hsazi=315&hselev=45&map_lat=46.92282397995615&map_lon=-114.39074234642008&map_zoom=10,53
101,1/28/20,16:49,3d printer to create a topographic map of our campus.,Map,Neighborhood,3DP,Fairfax,United States,37.9871,-122.5889,,(not set),53
106,11/26/20,23:12,Just trying to figure out how to 3d print my property,Map,Property,3DP,Duncan,United States,34.5023,-97.9578,,trlat=44.746076744164014&trlon=-107.90668627090454&bllat=44.45273016368441&bllon=-108.32721372909546&DEM_name=USGS/NED&tilewidth=100&printres=0.2&ntilesx=1&ntilesy=1&DEMresolution=66.77&basethick=1&zscale=1.0&fileformat=STLb&maptype=roadmap&gamma=1&transp=20&hsazi=315&hselev=45&map_lat=39.98777082063847&map_lon=-123.4851082589545&map_zoom=13,53
100,11/20/19,12:35,"private use, I am printing models of the 8000 m peaks",Map,Mountains,3DP,Madrid,Spain,40.4168,-3.7038,,(not set),53
102,1/30/20,15:06,Just testing the site and curious to see the outcome!,Misc,Curious,3DP,(not set),Canada,0,0,,(not set),53
104,6/30/20,11:53,trying to make a 3D map for a youtube video of a hike,Recreation,Hiking,3DP,Stalybridge,United Kingdom,53.4838,-2.0501,,(not set),53
103,6/25/20,09:38,examining topography in North American Monsoon region,Research,Meteorology,3DP,Tucson,United States,32.2226,-110.9747,,(not set),53
107,10/27/19,18:50,"testing for education, geography course high school.",Education,High School,3DP,Sunshine Coast,Australia,-26.65,153.0667,,(not set),52
109,8/20/20,14:26,museum education online tours of local geology sites,Education,Museum,3DP,Lansing,United States,42.4842,-76.4799,,(not set),52
108,7/18/20,03:18,just wanted to print the local area on my 3d printer,Map,Property,3DP,Sydney,Australia,-33.8688,151.2093,,(not set),52
110,11/25/20,04:49,We want to use this to learn the country geological.,Research,Geology,3DP,Ghent,Belgium,51.0543,3.7174,"Drei Zinnen, Itali��",place=Drei%20Zinnen%2C%20Itali%C3%AB&trlat=46.658737511748186&trlon=12.369338778203094&bllat=46.588000239912745&bllon=12.227585819905364&DEM_name=USGS/NED&tilewidth=80&printres=0.2&ntilesx=1&ntilesy=1&DEMresolution=27.14&basethick=1&zscale=1.0&fileformat=STLb&maptype=roadmap&gamma=1&transp=70&hsazi=315&hselev=45&map_lat=46.62339487082899&map_lon=12.29846229905423&map_zoom=13,52
111,12/3/20,11:01,Teaching demo for middle school maker space-x-carve,Education,Middle School,CNC,(not set),United States,0,0,"Alta, UT, USA",place=Alta%2C%20UT%2C%20USA&trlat=40.59805605226297&trlon=-111.59378910825232&bllat=40.57892232814997&bllon=-111.61898488566857&DEM_name=USGS/NED&tilewidth=80&printres=0.2&ntilesx=1&ntilesy=1&DEMresolution=5.33&basethick=1&zscale=1.0&fileformat=STLb&maptype=roadmap&gamma=1&transp=20&hsazi=315&hselev=45&map_lat=40.589631370124465&map_lon=-111.61076436207276&map_zoom=15,51
113,1/10/20,16:56,A 3D printed gift because of newly purchased land.,Crafts,Gift,3DP,Semmes,United States,30.7787,-88.2596,,(not set),50
112,11/6/19,10:14,http://www.poweredbyed.com/wordpress/?page_id=1815,Map,Outdoors,3DP,Binghamton,United States,42.0987,-75.918,,(not set),50
114,6/28/20,13:15,personal use. Printing the region around my house.,Map,Property,3DP,Yakima,United States,46.6021,-120.5059,,(not set),50
120,10/8/20,11:20,As a Stearns Family property topography wall map.,Crafts,Wall Art,3DP,Yarmouth,United States,43.8006,-70.1867,,(not set),49
117,2/15/20,07:15,3D printing of neighbouring mountains to my home.,Map,Mountains,3DP,Trbovlje,Slovenia,46.1504,15.0453,,(not set),49
118,5/26/20,05:13,"display of area I live, thanks for the great work",Map,Neighborhood,3DP,Budapest,Hungary,47.4979,19.0402,,(not set),49
119,7/13/20,13:57,3D printed map of backcountry ski/snowboard zones,Recreation,Ski,3DP,South Burlington,United States,44.467,-73.171,,(not set),49
115,1/30/20,14:21,assessing capability of printing terrain on Form3,Test,Test,3DP,(not set),United States,0,0,,(not set),49
116,2/4/20,09:21,testing different software to reference 3d models,Test,Test,3DP,Reston,United States,38.9586,-77.357,,(not set),49
128,12/7/20,15:48,"fun, possible Christmas present or teaching tool",Crafts,Gift,3DP,Eau Claire,United States,44.8114,-91.4985,"Eau Claire, WI, USA",place=Eau%20Claire%2C%20WI%2C%20USA&trlat=44.8674659018257&trlon=-91.26265658389282&bllat=44.784920207534526&bllon=-91.55054701815794&DEM_name=USGS/NED&tilewidth=80&printres=0.4&ntilesx=1&ntilesy=1&DEMresolution=113.84&basethick=5&zscale=5&fileformat=GeoTiff&maptype=roadmap&gamma=1&transp=20&hsazi=315&hselev=45&map_lat=44.8156206408712&map_lon=-91.44152890644041&map_zoom=12,48
121,9/22/19,14:01,Demonstration at GSA NESTA GeoTeach Share-a-Thon,Education,College,3DP,Phoenix,United States,33.4484,-112.074,,(not set),48
123,4/5/20,15:05,i want to make a science project about volcanoes,Education,High School,3DP,Towson,United States,39.4015,-76.6019,,(not set),48
124,4/22/20,05:57,university of architecture for terrain and model,Education,College,3DP,(not set),Kosovo,0,0,,(not set),48
125,5/16/20,15:41,Art project. Thank you so much for this service!,Education,Art Project,3DP,Aloha,United States,45.4943,-122.8671,,(not set),48
127,6/28/20,09:42,"Printing Lanai, where I was born, for grandkids!",Map,Neighborhood,3DP,Washington,United States,38.9072,-77.0369,,(not set),48
129,12/9/20,09:27,Personal use (3D printing my favourite mountain),Map,Mountains,3DP,Lyon,France,45.764,4.8357,,trlat=45.325007126360646&trlon=5.902327322758434&bllat=45.2720314257579&bllon=5.832164772212232&DEM_name=JAXA/ALOS/AW3D30/V2_2&tilewidth=80&printres=0.4&ntilesx=1&ntilesy=1&DEMresolution=27.52&basethick=1&zscale=1.0&fileformat=STLb&maptype=roadmap&gamma=1&transp=20&hsazi=315&hselev=45&map_lat=45.281570120710406&map_lon=5.885012999999981&map_zoom=13,48
122,1/27/20,18:51,Printing my home town for sentimental reasons ;),Map,Neighborhood,3DP,Tsukuba,Japan,36.0835,140.0764,,(not set),48
126,6/10/20,21:32,test for doing 3d printed terrain in the future.,Test,Test,3DP,Rogers,United States,36.332,-94.1185,,(not set),48
131,2/4/20,14:19,Creating a topo of the state on my CNC machine.,Crafts,Carving,CNC,Sioux Falls,United States,43.5473,-96.7283,,(not set),47
135,11/27/20,15:20,"present for father, 3d print of the family farm",Crafts,Gift,3DP,Kaysville,United States,41.0352,-111.9385,,trlat=39.91614472144935&trlon=-101.970834430273&bllat=39.9087723040371&bllon=-101.992693427916&DEM_name=USGS/NED&tilewidth=80&printres=0.4&ntilesx=1&ntilesy=1&DEMresolution=9.35&basethick=1&zscale=1.0&fileformat=STLb&maptype=roadmap&gamma=1&transp=40&hsazi=315&hselev=45&map_lat=39.911872289270846&map_lon=-101.98269827277852&map_zoom=16,47
134,5/29/20,04:50,Exploring options for 3d renders of height data,Design,3D Design,3DP,Brisbane,Australia,-27.4698,153.0251,,(not set),47
132,2/16/20,14:39,undergraduate course Computer Science Rendering,Education,College,3DP,Calgary,Canada,51.0447,-114.0719,,(not set),47
130,1/21/20,22:41,american legion post 224 cherry lake madison fl,Map,Map,3DP,Tallahassee,United States,30.4383,-84.2807,,(not set),47
133,5/18/20,16:14,36 Print view from house to help identify peaks,Map,Mountains,3DP,Commerce City,United States,39.8083,-104.9339,,(not set),47
140,10/7/20,15:51,3d print terrain for toy jeep (decorative use),Crafts,Gift,3DP,Lexington,United States,38.0406,-84.5037,,(not set),46
137,2/6/20,12:05,"Kingston,NY Maritime Museum to show water rise",Education,Museum,3DP,New Paltz,United States,41.7476,-74.0868,,(not set),46
139,7/18/20,08:31,love to know 3D terrain model for personal use,Misc,Message,3DP,New York,United States,40.7128,-74.006,,(not set),46
138,5/10/20,12:09,attempting to detail area for gold prospecting,Research,Geology,3DP,Murrieta,United States,33.5539,-117.2139,,(not set),46
136,1/26/20,20:52,Test Printing this map because I go here a lot,Test,Test,3DP,Forestville,United States,38.4735,-122.8903,,(not set),46
144,5/29/20,07:37,3d print an area map for my wall. its a hobby,Crafts,Wall Art,3DP,Kampala,Uganda,0.3476,32.5825,,(not set),45
145,6/26/20,03:09,Trying to print 3d model of home town as gift,Crafts,Gift,3DP,Zagreb,Croatia,45.815,15.9819,,(not set),45
147,7/24/20,14:44,To create a 3D model on a CNC milling machine,Crafts,Crafts,CNC,Wolfville,Canada,45.0918,-64.3598,,(not set),45
143,5/21/20,00:27,study of effect of water reservoir on terrain,Education,Education,3DP,Sagar,India,23.8388,78.7378,,(not set),45
149,11/2/20,16:48,Oregon Institute of Technology Senior Project,Education,College,3DP,Klamath Falls,United States,42.2249,-121.7817,,trlat=41.760232050355455&trlon=-121.7489302310444&bllat=41.1638090149124&bllon=-122.54482390017283&DEM_name=USGS/NED&tilewidth=80&printres=0.5&ntilesx=1&ntilesy=1&DEMresolution=415.58&basethick=0&zscale=1.0&fileformat=STLb&maptype=roadmap&gamma=0.5&transp=20&hsazi=315&hselev=45&map_lat=41.540716233683796&map_lon=-121.74162846736253&map_zoom=10,45
142,2/2/20,10:23,Make a terrain model of where my wife grew up,Map,Property,3DP,Everett,United States,47.979,-122.2021,,(not set),45
146,7/18/20,06:27,Personal use to know how powerful of 3D model,Misc,Personal,3DP,New York,United States,40.7128,-74.006,,(not set),45
141,12/7/19,23:52,to help understand radio coverage in the area,Recreation,Radio,3DP,Brisbane,Australia,-27.4698,153.0251,,(not set),45
148,8/20/20,10:07,Research of the Buffalo Creek Mining Disaster,Research,Research,3DP,Odenton,United States,39.084,-76.7002,,(not set),45
150,1/22/20,03:12,To CNC carve a topigraphical map of Tasmania,Crafts,Crafts,CNC,Auckland,New Zealand,-36.8485,174.7633,,(not set),44
152,4/20/20,13:07,Print a gift for my Dad - he was born nearby,Crafts,Gift,3DP,Sunnyside,United States,45.4337,-122.5519,,(not set),44
156,10/1/20,11:38,"Educational purposes , thanks for the models",Crafts,Hobby,3DP,Medellin,Colombia,6.2486,-75.5742,,(not set),44
155,9/18/20,17:34,As a layout for a spaceship crash (Home Use),Design,Diorama,3DP,Washington,United States,35.5466,-77.0522,,(not set),44
154,9/15/20,08:54,I live on this lake so I wanted a topo of it,Map,Property,3DP,Cassville,United States,36.677,-93.8688,,(not set),44
151,3/5/20,09:58,deep reinforcement learning of legged robots,Research,Research,3DP,Benidorm,Spain,38.5411,-0.1225,,(not set),44
157,12/8/20,15:40,test. learning about mapping and 3d printing,Test,Test,3DP,Valladolid,Spain,41.6522,-4.7245,,trlat=28.8716&trlon=-17.7060&bllat=28.4407&bllon=-18.0267&DEM_name=JAXA/ALOS/AW3D30/V2_2&tilewidth=50&printres=0.4&ntilesx=1&ntilesy=1&DEMresolution=329.84&basethick=1&zscale=1.5&fileformat=STLb&maptype=roadmap&gamma=1&transp=20&hsazi=315&hselev=45&map_lat=28.394212954035677&map_lon=-17.92579906915463&map_zoom=9,44
158,10/3/19,17:37,"casting in porcelain, thanks for the files!",Crafts,Hobby,3DP,Los Angeles,United States,34.0522,-118.2437,,(not set),43
159,10/9/19,19:54,I will teach geomorphology with this model.,Education,College,3DP,Alfenas,Brazil,-21.4245,-45.947,,(not set),43
160,1/28/20,20:18,Printing a 3D map of the Dolomites in Italy,Map,Mountains,3DP,Grand Blanc Township,United States,42.9125,-83.6668,,(not set),43
161,6/7/20,09:06,I wanna print a map of my favourite village,Map,Neighborhood,3DP,Oldenburg,Germany,53.1434,8.2146,,(not set),43
162,9/27/20,16:13,This is my service area at work. Super cool,Map,Map,3DP,(not set),United States,0,0,,(not set),43
164,2/14/20,12:55,explain to family and friends where I work,Crafts,Hobby,3DP,(not set),United States,0,0,,(not set),42
168,11/10/20,18:18,just to have a terrain 3d print of my town,Crafts,Hobby,3DP,Washington,United States,38.5581,-91.0121,,trlat=38.46665880755599&trlon=-90.95124634007585&bllat=38.42134984785058&bllon=-91.05963083008896&DEM_name=USGS/NED&tilewidth=80&printres=0.4&ntilesx=1&ntilesy=1&DEMresolution=47.31&basethick=1&zscale=1.0&fileformat=STLb&maptype=roadmap&gamma=1&transp=0&hsazi=315&hselev=45&map_lat=38.49786376355617&map_lon=-90.95932204774192&map_zoom=12,42
163,9/23/19,16:25,classroom instruction / data visualization,Education,Teaching,3DP,Blanding,United States,37.6242,-109.4782,,(not set),42
169,11/14/20,21:47,"Education - normal faulting, Basin & Range",Education,College,3DP,(not set),United Arab Emirates,0,0,,trlat=42.91050058015821&trlon=-118.09757491416933&bllat=42.608016390951505&bllon=-118.59561463661194&DEM_name=USGS/NED&tilewidth=100&printres=0.2&ntilesx=1&ntilesy=1&DEMresolution=163.08&basethick=5&zscale=1.0&fileformat=STLb&maptype=roadmap&gamma=1&transp=20&hsazi=315&hselev=45&map_lat=42.59912483288197&map_lon=-118.27241548045755&map_zoom=10,42
170,11/15/20,08:33,Using with high school earth science class,Education,High School,3DP,Elma Center,United States,42.8298,-78.6361,"2111 Girdle Rd, Elma, NY 14059, USA",place=2111%20Girdle%20Rd%2C%20Elma%2C%20NY%2014059%2C%20USA&trlat=42.840947905718195&trlon=-78.59366699725352&bllat=42.83017117680345&bllon=-78.60746182173452&DEM_name=USGS/NED&tilewidth=80&printres=0.4&ntilesx=1&ntilesy=1&DEMresolution=5.64&basethick=1&zscale=1.0&fileformat=STLb&maptype=roadmap&gamma=1&transp=20&hsazi=315&hselev=45&map_lat=42.83930545623915&map_lon=-78.6023453962799&map_zoom=15,42
166,9/1/20,19:58,"3d Printing ski resort, very cool program!",Recreation,Ski,3DP,Houghton,United States,47.1211,-88.5694,,(not set),42
167,9/11/20,22:57,favorite ski area: Arapahoe Basin Colorado,Recreation,Ski,3DP,Loveland,United States,40.3978,-105.075,,(not set),42
165,6/10/20,21:36,testing your website to see what it offers,Test,Test,3DP,Rogers,United States,36.332,-94.1185,,(not set),42
172,1/16/20,14:11,friend is hobby model maker and traveller,Crafts,Gift,3DP,Pilsen,Czechia,49.7384,13.3736,,(not set),41
175,4/18/20,04:49,CNC A Topographic map with engraved roads,Crafts,Carving,CNC,The Hague,Netherlands,52.0705,4.3007,,(not set),41
173,2/3/20,17:29,Just for fun to see a river that I kayak.,Map,Outdoors,3DP,Fletcher,United States,35.4307,-82.5012,,(not set),41
171,10/4/19,16:48,testing ideas to make a fancy catan board,Test,Test,3DP,(not set),United States,0,0,,(not set),41
174,2/21/20,12:40,test again ;) thank you for this programm,Test,Test,3DP,Paderborn,Germany,51.7189,8.7575,,(not set),41
184,9/1/20,17:39,This is amazing. Present for my partner.,Crafts,Gift,3DP,High Wycombe,United Kingdom,51.6286,-0.7482,,(not set),40
176,10/26/19,02:09,teaching College prep geography students,Education,High School,3DP,Atascadero,United States,35.4894,-120.6707,,(not set),40
181,5/11/20,16:14,Architecture Assignment (for university),Education,College,3DP,Wellington,New Zealand,-41.2865,174.7762,,(not set),40
178,1/24/20,18:59,Personal 3D printing of nearby mountains,Map,Mountains,3DP,Catalina Foothills,United States,32.2979,-110.9187,,(not set),40
183,8/4/20,19:09,Custom map of my favorite local mountain,Map,Mountains,3DP,Burlington,United States,44.4759,-73.2121,,(not set),40
185,9/25/20,06:15,Looking to land to build retirement home,Map,Property,3DP,Lombard,United States,41.88,-88.0078,,(not set),40
186,10/3/20,07:32,3D printing of where I live with scaling,Map,Neighborhood,3DP,Ross Township,United States,40.5368,-80.02,,(not set),40
177,1/22/20,17:02,Make a map of our cross country ski area,Recreation,Ski,3DP,Salmon Arm,Canada,50.7001,-119.2838,,(not set),40
180,4/24/20,09:18,Model of Savo Island for WWII Naval Game,Recreation,Gaming,3DP,Ottawa,Canada,45.4215,-75.6972,,(not set),40
179,3/25/20,08:34,versuch nochmals ob so etwas geht rainer,Test,Test,3DP,Munich,Germany,48.1351,11.582,,(not set),40
182,7/29/20,21:17,Experimentation. First 3d model attempy.,Test,Test,3DP,Bristol,United States,44.1334,-73.079,,(not set),40
187,9/27/19,09:38,A new project for creating collectibles,Crafts,Hobby,3DP,Kigali,Rwanda,-1.9706,30.1044,,(not set),39
188,10/31/19,06:27,I wanna printing this for a familiar :),Crafts,Gift,3DP,Vac,Hungary,47.7842,19.1352,,(not set),39
194,7/3/20,12:58,To 3d print and or cnc out with wood :),Crafts,Carving,CNC,Castle Rock,United States,39.3722,-104.8561,,(not set),39
197,12/7/20,16:04,fun / Christmas present / teaching tool,Crafts,Gift,3DP,Eau Claire,United States,44.8114,-91.4985,"Eau Claire, WI, USA",place=Eau%20Claire%2C%20WI%2C%20USA&trlat=44.89756116669481&trlon=-91.27154363642882&bllat=44.739508215964705&bllon=-91.60998119364929&DEM_name=USGS/NED&tilewidth=80&printres=0.4&ntilesx=1&ntilesy=1&DEMresolution=133.84&basethick=1&zscale=10&fileformat=STLb&maptype=roadmap&gamma=1&transp=0&hsazi=315&hselev=45&map_lat=44.81850400943241&map_lon=-91.4200684751055&map_zoom=12,39
195,7/24/20,10:58,"3D print table mountains, Fresno County",Map,Map,3DP,Alameda,United States,37.7799,-122.2822,,(not set),39
196,12/3/20,13:26,Used to live in this part of New Jersey,Map,Property,3DP,Bellaire,United States,29.7058,-95.4588,,trlat=41.1397463199422&trlon=-74.09941554810679&bllat=40.86458244260699&bllon=-74.61745024468576&DEM_name=USGS/NED&tilewidth=300&printres=0.4&ntilesx=1&ntilesy=1&DEMresolution=58.11&basethick=1&zscale=3&fileformat=STLb&maptype=roadmap&gamma=1&transp=20&hsazi=315&hselev=45&map_lat=41.003920005632736&map_lon=-74.27752406146203&map_zoom=11,39
198,12/13/20,21:43,to print my father's favorite locations,Map,Outdoors,3DP,(not set),United States,0,0,,trlat=37.56569317205202&trlon=-110.55858632392884&bllat=37.37135738300734&bllon=-110.8073022014618&DEM_name=USGS/NED&tilewidth=200&printres=0.4&ntilesx=1&ntilesy=1&DEMresolution=44&basethick=1&zscale=2&fileformat=STLb&maptype=roadmap&gamma=1&transp=20&hsazi=315&hselev=45&map_lat=37.502736703039666&map_lon=-110.78058285645292&map_zoom=11,39
189,1/4/20,20:53,See how it works in my cheap 3d printer,Test,Test,3DP,(not set),Dominican Republic,0,0,,(not set),39
190,1/29/20,21:49,Test print...tallest point in Missouri!,Test,Test,3DP,St. Louis,United States,38.627,-90.1994,,(not set),39
191,4/13/20,01:51,Test my 3D printer for printing terrain,Test,Test,3DP,Glendale,United States,34.1425,-118.2551,,(not set),39
192,5/13/20,00:15,I am making a model of Mt Fuji for fun!,Test,Test,3DP,Yokohama,Japan,35.4437,139.638,,(not set),39
193,5/24/20,15:22,"thought it was cool to try, just visual",Test,Test,3DP,(not set),Canada,0,0,,(not set),39
200,12/17/19,12:29,wall art. personal use in my own home.,Crafts,Wall Art,3DP,Plymouth,United States,41.9584,-70.6673,,(not set),38
207,11/9/20,05:13,3d printing a model as a birthday gift,Crafts,Gift,3DP,Munich,Germany,48.1351,11.582,,trlat=47.462191631599445&trlon=11.050212674275999&bllat=47.41522592535939&bllon=10.957630865708952&DEM_name=USGS/NED&tilewidth=80&printres=0.4&ntilesx=1&ntilesy=1&DEMresolution=34.92&basethick=1&zscale=1.5&fileformat=STLb&maptype=hybrid&gamma=1&transp=20&hsazi=315&hselev=45&map_lat=47.41714190577075&map_lon=11.026815771981937&map_zoom=14,38
201,2/24/20,06:57,I need this model for FLAC3D software.,Design,3D Design,3DP,(not set),Iran,0,0,,(not set),38
205,6/20/20,00:17,University - Undergrduate Architecture,Education,College,3DP,Wellington,New Zealand,-41.2865,174.7762,,(not set),38
199,10/16/19,11:36,just wanna have one of my hous at home,Map,Property,3DP,Vienna,Austria,48.2082,16.3738,,(not set),38
202,2/24/20,13:06,Produce CNC terrain map for hobby use.,Misc,Personal,CNC,(not set),United States,40.6105,-111.2807,,(not set),38
203,2/29/20,17:58,Model printing and painting as a hobby,Misc,Personal,3DP,San Jose,United States,37.3382,-121.8863,,(not set),38
206,7/27/20,11:13,"Personal project, Battle of Gettysburg",Research,History,3DP,Babylon,United States,40.6957,-73.3257,,(not set),38
204,3/16/20,18:06,testing if it will work for cnc router,Test,Test,CNC,Tacoma,United States,47.2529,-122.4443,,(not set),38
208,10/29/19,06:43,For making a jigsaw puzzle. Thank you,Crafts,Puzzle,3DP,Santiago,Chile,-33.4489,-70.6693,,(not set),37
211,2/4/20,04:27,i would like tomake a map with my cnc,Crafts,Crafts,CNC,Trois-Rivieres,Canada,46.343,-72.5421,,(not set),37
217,7/25/20,23:41,Make into a trophy for beer Olympics.,Crafts,Trophy,3DP,Sunbury,United States,40.8626,-76.7944,,(not set),37
221,12/13/20,01:38,CNC file...possible gift for a friend,Crafts,Gift,CNC,Plymouth,United States,41.9584,-70.6673,,trlat=44.216929589080806&trlon=-72.76552326354833&bllat=44.050108165471876&bllon=-73.02129421692044&DEM_name=USGS/NED&tilewidth=300&printres=0.4&ntilesx=1&ntilesy=1&DEMresolution=27.29&basethick=1&zscale=1.0&fileformat=STLb&maptype=roadmap&gamma=1&transp=90&hsazi=315&hselev=45&map_lat=44.20771022688874&map_lon=-72.83943423887314&map_zoom=11,37
220,10/25/20,15:01,For visualization on personal website,Design,3D Design,3DP,San Jose,United States,37.3382,-121.8863,,trlat=36.53096611009655&trlon=-111.64936205215456&bllat=35.88941513692816&bllon=-112.50430723495484&DEM_name=USGS/NED&tilewidth=80&printres=0.4&ntilesx=1&ntilesy=1&DEMresolution=384.4&basethick=1&zscale=1.0&fileformat=STLb&maptype=roadmap&gamma=1&transp=20&hsazi=315&hselev=45&map_lat=36.2118889514511&map_lon=-112.04667037092528&map_zoom=10,37
209,1/20/20,10:40,want to make a 3d model for a hmework,Education,Learning,3DP,(not set),Peru,0,0,,(not set),37
212,2/9/20,15:41,Teaching 3D printing in middle school,Education,Middle School,3DP,Englewood,United States,39.6478,-104.9878,,(not set),37
215,5/22/20,11:12,I am using this for a school project.,Education,School Project,3DP,Irvine,United States,33.6846,-117.8265,,(not set),37
210,1/28/20,04:42,3d printing and understanding terrain,Map,Outdoors,3DP,Gurgaon,India,28.4595,77.0266,,(not set),37
214,5/17/20,12:20,Print the place I lived for 27 years.,Map,Property,3DP,Beaverton,United States,45.4889,-122.8014,,(not set),37
219,9/15/20,09:21,want to cnc a model of Tablerock Lake,Map,Outdoors,CNC,Cassville,United States,36.677,-93.8688,,(not set),37
218,9/8/20,21:45,Its a State Park that I camp at alot.,Recreation,Camping,3DP,Cassville,United States,36.677,-93.8688,,(not set),37
216,5/29/20,08:37,"3D printing - thanks, great resource!",Test,Test,3DP,London,United Kingdom,51.5074,-0.1278,,(not set),37
228,10/27/20,13:56,diplomatic excercise for univerisity,Education,College,3DP,Volos,Greece,39.3426,22.882,,trlat=39.383274048231016&trlon=22.936171509178756&bllat=39.37626193893658&bllon=22.930286183806512&DEM_name=MERIT/DEM/v1_0_3&tilewidth=80&printres=0.4&ntilesx=1&ntilesy=1&DEMresolution=2.54&basethick=1&zscale=1.0&fileformat=STLb&maptype=roadmap&gamma=1&transp=100&hsazi=315&hselev=45&map_lat=39.37954422371019&map_lon=22.93257975191103&map_zoom=17,36
222,10/7/19,12:28,3d printing local terrain for hobbie,Map,Neighborhood,3DP,Seattle,United States,47.6062,-122.3321,,(not set),36
223,3/14/20,03:56,I want a printed 3d model of my farm,Map,Farm,3DP,Madrid,Spain,40.4168,-3.7038,,(not set),36
224,7/18/20,03:44,looking at 3d printing local terrain,Map,Outdoors,3DP,Whitehall,United States,43.41,-86.3487,,(not set),36
226,9/11/20,21:30,Personal Use modelling home location,Map,Property,3DP,Adelaide,Australia,-34.9285,138.6007,,(not set),36
229,12/7/20,16:13,Topo of our property in Waikii Ranch,Map,Property,3DP,Kailua-Kona,United States,19.64,-155.9969,,trlat=37.77510472802718&trlon=-119.55993059800632&bllat=37.72081089538005&bllon=-119.62859514878757&DEM_name=USGS/NED&tilewidth=80&printres=0.4&ntilesx=1&ntilesy=1&DEMresolution=30.26&basethick=1&zscale=3&fileformat=STLb&maptype=roadmap&gamma=1&transp=0&hsazi=315&hselev=45&map_lat=19.866149415866253&map_lon=-155.67520179941792&map_zoom=18,36
227,10/24/20,09:43,friend who loves hiking in this area,Recreation,Hiking,3DP,Ouddorp,Netherlands,51.8091,3.9352,,trlat=46.5266406403708&trlon=7.760152563256106&bllat=46.439645099705764&bllon=7.586393698853335&DEM_name=JAXA/ALOS/AW3D30/V2_2&tilewidth=120&printres=0.4&ntilesx=1&ntilesy=1&DEMresolution=44.47&basethick=1&zscale=1.0&fileformat=STLb&maptype=roadmap&gamma=1&transp=40&hsazi=315&hselev=45&map_lat=46.482938303106124&map_lon=7.656793638867221&map_zoom=13,36
232,1/26/20,12:50,Present for someone who lives there,Crafts,Gift,3DP,Beaverton,United States,45.4889,-122.8014,,(not set),35
236,5/20/20,04:14,school- finale architecture project,Design,Architecture,3DP,Tel Aviv-Yafo,Israel,32.0853,34.7818,,(not set),35
240,11/15/20,01:31,for decorating a 3d printed surface,Design,Art,3DP,Anchorage,United States,61.2181,-149.9003,,trlat=47.51700774152553&trlon=-94.80447494316891&bllat=47.447400544425314&bllon=-94.95181583691435&DEM_name=USGS/NED&tilewidth=200&printres=0.4&ntilesx=1&ntilesy=1&DEMresolution=22.21&basethick=1&zscale=3&fileformat=STLb&maptype=roadmap&gamma=1&transp=0&hsazi=315&hselev=45&map_lat=47.47039552345519&map_lon=-94.89677064944104&map_zoom=13,35
234,2/3/20,07:45,Secondary Earth Science instruction,Education,High School,3DP,Roanoke,United States,37.271,-79.9414,,(not set),35
238,11/14/20,07:25,Architectur Faculty of Uni Hannover,Education,College,3DP,Hanover,Germany,52.3759,9.732,,trlat=53.564503187659156&trlon=9.894091268953584&bllat=53.549080033055276&bllon=9.858385702547336&DEM_name=USGS/SRTMGL1_003&tilewidth=80&printres=0.5&ntilesx=1&ntilesy=1&DEMresolution=14.79&basethick=2&zscale=1.0&fileformat=STLb&maptype=roadmap&gamma=1&transp=20&hsazi=315&hselev=45&map_lat=53.556791610357216&map_lon=9.87623848575046&map_zoom=14,35
231,1/21/20,10:25,Laser Cut Elevation Model (layered),Map,Outdoors,Laser,Vancouver,United States,45.6257,-122.6761,,(not set),35
242,12/3/20,13:37,My brother has a house on Lake Como,Map,Property,3DP,Bellaire,United States,29.7058,-95.4588,,trlat=41.866044710313254&trlon=-75.32382045171528&bllat=41.834077357325555&bllon=-75.37535686276225&DEM_name=USGS/NED&tilewidth=80&printres=0.2&ntilesx=1&ntilesy=1&DEMresolution=10.7&basethick=3&zscale=1.25&fileformat=STLb&maptype=roadmap&gamma=1&transp=20&hsazi=315&hselev=45&map_lat=41.85290896043084&map_lon=-75.33887423805265&map_zoom=14,35
230,1/2/20,11:06,Backcountry ski tour route finding.,Recreation,Ski,3DP,Seattle,United States,47.6062,-122.3321,,(not set),35
237,8/17/20,20:03,Just playing with my new 3D printer,Test,Test,3DP,Longmont,United States,40.1672,-105.1019,,(not set),35
241,11/19/20,12:53,"testing site, practice CNC project.",Test,Test,CNC,Colorado Springs,United States,38.8339,-104.8214,,trlat=39.267695208285026&trlon=-104.76502414170356&bllat=38.489422227981905&bllon=-105.2149085731402&DEM_name=USGS/NED&tilewidth=80&printres=0.4&ntilesx=1&ntilesy=1&DEMresolution=195.19&basethick=1&zscale=2&fileformat=STLb&maptype=hybrid&gamma=1&transp=20&hsazi=315&hselev=45&map_lat=38.92050444705452&map_lon=-105.0251552904313&map_zoom=10,35
254,12/14/20,16:42,CNC map of Lake Powell for my wife,Crafts,Carving,CNC,Lehi,United States,40.3916,-111.8508,,trlat=44.746076744164014&trlon=-107.83344408340454&bllat=44.45273016368441&bllon=-108.40045591659546&DEM_name=USGS/NED&tilewidth=80&printres=0.4&ntilesx=1&ntilesy=1&DEMresolution=225.09&basethick=1&zscale=1.0&fileformat=STLb&maptype=roadmap&gamma=1&transp=0&hsazi=315&hselev=45&map_lat=37.30028342732157&map_lon=-110.96431258714453&map_zoom=10,34
244,11/27/19,15:22,High School class on Earth Science,Education,High School,3DP,New York,United States,40.7128,-74.006,,(not set),34
247,5/17/20,00:12,Architectural Project - University,Education,College,3DP,Wellington,New Zealand,-41.2865,174.7762,,(not set),34
248,5/27/20,01:14,3rd year industrial design project,Education,College,3DP,Levin,New Zealand,-40.6222,175.2862,,(not set),34
246,3/16/20,21:33,To have a cool map of my home city,Map,Property,3DP,Calgary,Canada,51.0447,-114.0719,,(not set),34
250,9/26/20,11:03,"for terrain modeling, many thanks!",Map,Outdoors,3DP,(not set),Hong Kong,0,0,,(not set),34
251,9/27/20,10:46,this is my hobby. im a model maker,Misc,Personal,3DP,Colombo,Sri Lanka,6.9271,79.8612,,(not set),34
252,10/7/20,19:14,"Proposed to my wife here, 3d print",Misc,Special,3DP,Breinigsville,United States,40.5394,-75.6315,,(not set),34
253,12/14/20,08:20,model railroad terrain 3d printing,Crafts,Railroad ,3DP,Hillsboro,United States,45.5272,-122.9361,"15405 NW Satellite Dr, Banks, OR 97106, USA",place=15405%20NW%20Satellite%20Dr%2C%20Banks%2C%20OR%2097106%2C%20USA&trlat=45.67996454317352&trlon=-123.08448688390479&bllat=45.59878439326578&bllon=-123.19322542550786&DEM_name=USGS/NED&tilewidth=80&printres=0.4&ntilesx=1&ntilesy=1&DEMresolution=42.39&basethick=1&zscale=1.0&fileformat=STLb&maptype=roadmap&gamma=1&transp=20&hsazi=315&hselev=45&map_lat=45.60900031125297&map_lon=-123.15863235625&map_zoom=11,34
243,10/23/19,15:26,just trying it out on a cnc router,Test,Test,CNC,(not set),United States,0,0,,(not set),34
249,8/22/20,09:32,Learning how to print 3d topo maps,Test,Test,3DP,(not set),United States,0,0,,(not set),34
257,11/17/19,14:12,o learn how to make 3D MAP on CNC,Crafts,Crafts,CNC,Zagreb,Croatia,45.815,15.9819,,(not set),33
261,4/13/20,12:02,Carving in CNC and product design,Crafts,Carving,CNC,San Vicente,Costa Rica,9.9634,-84.0458,,(not set),33
262,6/28/20,00:48,Base of a table for an epoxy pour,Crafts,Furniture,3DP,Kaneohe,United States,21.3996,-157.7974,,(not set),33
258,11/19/19,23:09,Personal use - framable art piece,Crafts,Wall Art,3DP,Coeur d'Alene,United States,47.6735,-116.7812,,(not set),33
265,9/26/20,16:12,ed printing hobby - just starting,Design,Art,3DP,Fife,United States,47.2393,-122.3571,,(not set),33
264,9/26/20,16:04,Teaching a physical geology class,Education,College,3DP,Ashburn,United States,39.0438,-77.4874,,(not set),33
255,9/18/19,14:08,To better understand my property.,Map,Property,3DP,Ogdensburg,United States,44.6942,-75.4863,,(not set),33
256,10/17/19,09:19,point of interest - national park,Map,Outdoors,3DP,Blanding,United States,37.6242,-109.4782,,(not set),33
259,1/12/20,01:32,generate polygon from car exident,Map,Neighborhood,3DP,Vsetin,Czechia,49.3389,17.9939,,(not set),33
263,7/30/20,12:27,"View of my home area in Vadis, WV",Map,Property,3DP,Marshall,United States,38.8226,-77.9739,,(not set),33
260,1/30/20,14:52,Testing terrain printing on Form3,Test,Test,3DP,(not set),United States,0,0,,(not set),33
270,3/30/20,11:05,gift for someone who lives there,Crafts,Gift,3DP,Florence,Italy,43.7696,11.2558,,(not set),32
272,12/7/20,15:39,"fun, possible Christmas present!",Crafts,Gift,3DP,Eau Claire,United States,44.8114,-91.4985,"Eau Claire, WI, USA",place=Eau%20Claire%2C%20WI%2C%20USA&trlat=44.90655884407591&trlon=-91.26673711787413&bllat=44.73828886783345&bllon=-91.61375774394226&DEM_name=USGS/NED&tilewidth=80&printres=0.4&ntilesx=1&ntilesy=1&DEMresolution=137.23&basethick=3&zscale=10&fileformat=obj&maptype=roadmap&gamma=1&transp=20&hsazi=315&hselev=45&map_lat=44.81633309602552&map_lon=-91.44591225634765&map_zoom=12,32
266,11/23/19,17:32,my wife's earth science 11 class,Education,High School,3DP,Chilliwack,Canada,49.1579,-121.9515,,(not set),32
267,1/31/20,10:26,Kingston Maritime Museum display,Education,Museum,3DP,New Paltz,United States,41.7476,-74.0868,,(not set),32
268,3/15/20,14:10,study the mountains in my region,Map,Mountains,3DP,Jeddah,Saudi Arabia,21.4858,39.1925,,(not set),32
269,3/30/20,03:16,"Houston Farm Maryville, Missouri",Map,Farm,3DP,Broken Arrow,United States,36.061,-95.7975,,(not set),32
271,8/29/20,21:53,For fun just to print my city :),Map,Neighborhood,3DP,San Antonio,United States,29.4241,-98.4936,,(not set),32
280,6/30/20,08:50,architectural competition model,Design,Architecture,3DP,Newbury,United Kingdom,51.4014,-1.3231,,(not set),31
273,9/23/19,12:45,for a geology project in school,Education,High School,3DP,Avondale,United States,33.4356,-112.3496,,(not set),31
283,11/6/20,18:06,printing models for school kids,Education,Elementary School,3DP,Evesham Township,United States,39.8523,-74.8858,"Mt Hood, Oregon 97041, USA",place=Mt%20Hood%2C%20Oregon%2097041%2C%20USA&trlat=44.74607434079175&trlon=-107.7910249757737&bllat=44.452732594514174&bllon=-108.44287502422631&DEM_name=USGS/NED&tilewidth=50&printres=0.4&ntilesx=1&ntilesy=1&DEMresolution=414.03&basethick=3&zscale=1.0&fileformat=STLb&maptype=roadmap&gamma=1&transp=20&hsazi=315&hselev=45&map_lat=45.372935331942486&map_lon=-121.69446383716607&map_zoom=16,31
284,11/17/20,05:55,documentary about the ruhr area,Education,Documentary,3DP,Gelsenkirchen,Germany,51.5177,7.0857,,trlat=44.75290384272821&trlon=-107.86518355674745&bllat=44.45959182007881&bllon=-108.43738099403382&DEM_name=USGS/NED&tilewidth=80&printres=0.4&ntilesx=1&ntilesy=1&DEMresolution=227.12&basethick=1&zscale=1.0&fileformat=STLb&maptype=roadmap&gamma=1&transp=20&hsazi=315&hselev=45&map_lat=51.511070496302004&map_lon=-352.90858003901&map_zoom=14,31
274,1/20/20,23:06,look at terrain around my house,Map,Property,3DP,Belmont,United States,37.5202,-122.2758,,(not set),31
275,1/25/20,11:25,for personnal use. its my house,Map,Property,3DP,Strasbourg,France,48.5734,7.7521,,(not set),31
276,2/27/20,11:58,Laser cutting a topography map.,Map,Outdoors,Laser,Cambridge,Canada,43.3616,-80.3144,,(not set),31
277,3/23/20,01:22,elevation comparison in my town,Map,Neighborhood,3DP,Auburn Hills,United States,42.6875,-83.2341,,(not set),31
278,4/25/20,13:45,Model of SpaceX Boca Chica area,Map,Map,3DP,Greenbrier,United States,35.234,-92.3877,,(not set),31
279,6/17/20,22:29,3d printing my favorite places.,Map,Outdoors,3DP,Fargo,United States,46.8772,-96.7898,,(not set),31
281,10/11/20,13:58,commemorating a rim to rim hike,Recreation,Hiking,3DP,Indianapolis,United States,39.7684,-86.1581,,(not set),31
282,10/20/20,10:33,trecking & climbing observation,Recreation,Hiking,3DP,(not set),Greece,0,0,,trlat=35.35683475595021&trlon=24.148158823776214&bllat=35.24108331347955&bllon=23.920328413772566&DEM_name=JAXA/ALOS/AW3D30/V2_2&tilewidth=80&printres=0.4&ntilesx=2&ntilesy=2&DEMresolution=51.81&basethick=2&zscale=4.5&fileformat=STLb&maptype=hybrid&gamma=1&transp=20&hsazi=315&hselev=45&map_lat=35.231858350720316&map_lon=23.95025185845072&map_zoom=11,31
290,12/9/19,21:23,3D Printing B&B souvenir gifts,Crafts,Gift,3DP,Omaha,United States,41.2565,-95.9345,,(not set),30
302,7/6/20,20:32,Resin casting of a local beach,Crafts,Crafts,3DP,San Clemente,United States,33.4274,-117.6126,,(not set),30
304,7/22/20,13:02,CNC Topographic map for a gift,Crafts,Gift,CNC,Jackson Township,United States,40.0919,-74.3587,,(not set),30
306,8/23/20,21:44,For a presentation for college,Crafts,Gift,3DP,Guatemala City,Guatemala,14.6349,-90.5069,,(not set),30
310,12/10/20,17:54,CNC carving a model of my city,Crafts,Carving,CNC,Salt Lake City,United States,40.7608,-111.891,,trlat=40.8601778730091&trlon=-111.64077284889522&bllat=40.353490946035215&bllon=-112.28621962623897&DEM_name=USGS/NED&tilewidth=80&printres=0.2&ntilesx=1&ntilesy=1&DEMresolution=273.13&basethick=1&zscale=1.0&fileformat=STLb&maptype=roadmap&gamma=1&transp=0&hsazi=315&hselev=45&map_lat=40.695750589611634&map_lon=-112.1282911594421&map_zoom=10,30
287,9/21/19,14:16,Demonstration for a maker fair,Education,Exhibition,3DP,(not set),United States,0,0,,(not set),30
293,1/28/20,16:08,display in a children's museum,Education,Museum,3DP,Eugene,United States,44.0521,-123.0868,,(not set),30
294,2/13/20,21:53,For my Grandson School Project,Education,School Project,3DP,Morgan Hill,United States,37.1305,-121.6544,,(not set),30
297,3/23/20,08:46,TO TEACH A CLASS AT IOWA STATE,Education,College,3DP,Ames,United States,42.0308,-93.6319,,(not set),30
301,6/26/20,13:51,College physical geology class,Education,College,3DP,Sneads Ferry,United States,34.5527,-77.3972,,(not set),30
307,9/23/20,03:20,3d printing for school project,Education,High School,3DP,Stavanger Municipality,Norway,59.1185,5.6662,,(not set),30
292,1/23/20,14:57,Going to 3D print the mountain,Map,Mountains,3DP,Hamden,United States,41.3839,-72.9026,,(not set),30
298,3/30/20,03:09,"KLINE FARM, Maitland, Missouri",Map,Farm,3DP,Broken Arrow,United States,36.061,-95.7975,,(not set),30
300,6/21/20,11:31,printing the area where i live,Map,Property,3DP,Risch-Rotkreuz,Switzerland,47.141,8.4298,,(not set),30
305,8/22/20,03:53,To look at property water shed,Map,Property,3DP,Sydney,Australia,-33.8688,151.2093,,(not set),30
308,10/13/20,13:22,Mt. Pisgah State Park 3D model,Map,Park,3DP,(not set),United States,0,0,,(not set),30
286,9/21/19,05:32,My brother and I 3DP for hobby,Misc,Personal,3DP,Oviedo,Spain,43.3619,-5.8494,,(not set),30
289,11/3/19,00:30,For showing to my grandparents,Misc,Personal,3DP,Wiesbaden,Germany,50.0782,8.2398,,(not set),30
309,11/18/20,23:39,Curious to see what this does!,Misc,Curious,3DP,Seattle,United States,47.6062,-122.3321,,trlat=46.938849320204035&trlon=-121.6027464515686&bllat=46.768866143542034&bllon=-121.93835874862673&DEM_name=USGS/NED&tilewidth=180&printres=0.25&ntilesx=1&ntilesy=1&DEMresolution=35.55&basethick=1&zscale=1.0&fileformat=STLb&maptype=roadmap&gamma=1&transp=20&hsazi=315&hselev=45&map_lat=46.87388878382245&map_lon=-121.82010776032328&map_zoom=11,30
303,7/15/20,23:22,Even more fun on the skifields,Recreation,Ski,3DP,Wellington,New Zealand,-41.2865,174.7762,,(not set),30
288,10/2/19,08:31,management study of Bluff Utah,Research,Research,3DP,Blanding,United States,37.6242,-109.4782,,(not set),30
296,3/14/20,09:30,Research purposes. Many thanks,Research,Research,3DP,Barcelona,Spain,41.3851,2.1734,,(not set),30
291,1/21/20,22:20,"CNC router experiment, Thanks!",Test,Test,CNC,Stillwater,United States,45.056,-92.8088,,(not set),30
299,4/5/20,05:04,try to create a 3d environment,Test,Test,3DP,Eastham,United States,41.83,-69.974,,(not set),30
312,2/18/20,08:48,a gift to a Zimbabwean friend,Crafts,Gift,3DP,Florence,Italy,43.7696,11.2558,,(not set),29
317,10/12/20,19:05,CNC router design for my wall,Crafts,Wall Art,CNC,Kennebunk,United States,43.3845,-70.544,,(not set),29
318,10/21/20,14:46,CNC carving for a epoxy table,Crafts,Furniture,CNC,Mandeville,United States,30.3582,-90.0656,hawaii,place=hawaii&trlat=22.262494053965977&trlon=-154.52284133911132&bllat=18.88488851511827&bllon=-159.81149948120117&DEM_name=USGS/NED&tilewidth=80&printres=0.4&ntilesx=2&ntilesy=1&DEMresolution=1378.52&basethick=5&zscale=1.5&fileformat=GeoTiff&maptype=roadmap&gamma=1&transp=20&hsazi=315&hselev=45&map_lat=20.559344580315503&map_lon=-157.1094921875&map_zoom=8,29
315,7/25/20,14:17,Trial terrain in Blender 2.83,Design,3D Design,3DP,Middletown,United States,39.5151,-84.3983,,(not set),29
319,11/1/20,21:25,Personal 3d rendering project,Design,3D Design,3DP,Rochester,United States,43.3045,-70.9756,,trlat=36.81236721269399&trlon=-108.67794346337968&bllat=36.519414704398045&bllon=-109.07028448110275&DEM_name=USGS/NED&tilewidth=80&printres=0.4&ntilesx=1&ntilesy=1&DEMresolution=175.38&basethick=1&zscale=1.0&fileformat=obj&maptype=roadmap&gamma=1&transp=10&hsazi=315&hselev=45&map_lat=36.694953733952715&map_lon=-108.83978169685058&map_zoom=11,29
313,7/12/20,05:59,"History class, I am a teacher",Education,High School,3DP,Newark,United States,39.6837,-75.7497,,(not set),29
316,7/31/20,13:57,Print a map of my home island,Map,Property,3DP,Washington,United States,38.9072,-77.0369,,(not set),29
314,7/19/20,03:06,"Thanks, for personal interest",Misc,Personal,3DP,(not set),Hong Kong,0,0,,(not set),29
321,1/25/20,11:21,carving out of wood with CNC,Crafts,Carving,CNC,Portland,United States,45.5051,-122.675,,(not set),28
332,6/14/20,07:14,3D Router carving for a gift,Crafts,Gift,CNC,Newmarket,Canada,44.0592,-79.4613,,(not set),28
333,8/24/20,17:37,Wood carving with CNC router,Crafts,Carving,CNC,Enumclaw,United States,47.2043,-121.9915,,(not set),28
334,9/9/20,14:00,3D printing birthday present,Crafts,Gift,3DP,Berlin,Germany,52.52,13.405,,(not set),28
324,5/16/20,20:28,Student architecture project,Design,Architecture,3DP,Melbourne,Australia,-37.8136,144.9631,,(not set),28
336,9/30/20,19:16,learning 3d modeling and cnc,Design,3D Design,CNC,Smyrna,United States,39.2998,-75.6046,,(not set),28
323,4/21/20,04:43,personal educational reasons,Education,Personal,3DP,Athens,Greece,37.9838,23.7275,,(not set),28
320,10/10/19,14:39,Personal use for 3D printing,Misc,Personal,3DP,(not set),Liechtenstein,0,0,,(not set),28
337,10/3/20,07:26,3D Printing for Personal Use,Misc,Personal,3DP,Ross Township,United States,40.5368,-80.02,,(not set),28
322,3/30/20,23:15,personal use...just love CB!,Recreation,Radio,3DP,Arvada,United States,39.8028,-105.0875,,(not set),28
335,9/23/20,14:20,Testing Process on Equipment,Test,Test,3DP,Albuquerque,United States,35.0844,-106.6504,,(not set),28
338,11/6/20,21:57,testing cnc cutting topomaps,Test,Test,CNC,Plainfield,United States,39.7042,-86.3994,,trlat=44.746076744164014&trlon=-107.84381886787415&bllat=44.45273016368441&bllon=-108.39008113212586&DEM_name=USGS/NED&tilewidth=50&printres=0.4&ntilesx=1&ntilesy=1&DEMresolution=346.96&basethick=1&zscale=1.0&fileformat=STLb&maptype=roadmap&gamma=1&transp=0&hsazi=315&hselev=45&map_lat=39.1202098673553&map_lon=-106.86993068374929&map_zoom=13,28
339,11/28/20,14:31,trying new things on the web,Test,Test,3DP,Sterling,United States,41.7886,-89.6962,"Rochelle, IL 61068, USA",place=Rochelle%2C%20IL%2061068%2C%20USA&trlat=41.943940602371484&trlon=-89.02334164348171&bllat=41.90562462267204&bllon=-89.07957719741131&DEM_name=USGS/NED&tilewidth=80&printres=0.4&ntilesx=1&ntilesy=1&DEMresolution=23.32&basethick=1&zscale=1.0&fileformat=STLb&maptype=roadmap&gamma=1&transp=20&hsazi=315&hselev=45&map_lat=41.924725224251084&map_lon=-89.05894518912882&map_zoom=14,28
342,12/3/19,13:34,present for my grand mother,Crafts,Gift,3DP,Bergen Municipality,Norway,60.3341,5.381,,(not set),27
348,2/29/20,17:17,Making a gift for a friend!,Crafts,Gift,3DP,St. Louis,United States,38.627,-90.1994,,(not set),27
359,10/26/20,19:42,CNC topo project for a gift,Crafts,Gift,CNC,Vernal,United States,40.4555,-109.5287,salt lake city,place=salt%20lake%20city&trlat=40.689215229128855&trlon=-111.71366474558724&bllat=40.61126055354658&bllon=-111.82716193110805&DEM_name=USGS/NED&tilewidth=140&printres=0.2&ntilesx=1&ntilesy=1&DEMresolution=13.71&basethick=0.5&zscale=1.0&fileformat=STLb&maptype=roadmap&gamma=1&transp=0&hsazi=315&hselev=45&map_lat=40.654365035033756&map_lon=-111.7807988516533&map_zoom=13,27
362,12/13/20,22:43,To make a gift for someone.,Crafts,Gift,3DP,Escondido,United States,33.1192,-117.0864,"Mt Russell, California, USA",place=Mt%20Russell%2C%20California%2C%20USA&trlat=36.701266950815295&trlon=-118.20024629898072&bllat=36.56020433756961&bllon=-118.4568943626404&DEM_name=USGS/NED&tilewidth=80&printres=0.4&ntilesx=1&ntilesy=1&DEMresolution=114.77&basethick=1&zscale=1.0&fileformat=STLb&maptype=roadmap&gamma=1&transp=10&hsazi=315&hselev=45&map_lat=36.716004795889134&map_lon=-118.43088545104447&map_zoom=11,27
340,9/28/19,11:47,fusion36�� landscape austria,Design,3D Design,3DP,Vienna,Austria,48.2082,16.3738,,(not set),27
350,4/11/20,12:03,probably a shelf decoration,Design,Decoration,3DP,Waterford Township,United States,42.6907,-83.4066,,(not set),27
341,10/3/19,07:45,Undergraduate Geology class,Education,College,3DP,Harrison,United States,40.97,-73.7176,,(not set),27
343,12/11/19,13:45,for a project for geography,Education,School Project,3DP,Sibiu,Romania,45.7983,24.1256,,(not set),27
345,1/24/20,16:56,CNC Carving for High School,Education,High School,CNC,(not set),United States,0,0,,(not set),27
346,1/26/20,11:45,Education of RAY Air cadets,Education,College,3DP,Bristol,United Kingdom,51.4545,-2.5879,,(not set),27
352,5/6/20,12:03,Elementary School Education,Education,Elementary School,3DP,Las Vegas,United States,36.1699,-115.1398,,(not set),27
355,5/11/20,14:20,Mapping my mothers hometown,Map,Property,3DP,Arroyo Grande,United States,35.1186,-120.5907,,(not set),27
357,9/5/20,21:33,3-d physical map generation,Map,Outdoors,3DP,Ojai,United States,34.448,-119.2429,,(not set),27
358,10/3/20,07:30,3D printing of where I live,Map,Neighborhood,3DP,Ross Township,United States,40.5368,-80.02,,(not set),27
360,12/9/20,14:20,Topography Printing Project,Map,Map,3DP,(not set),United States,0,0,,trlat=40.68164192360226&trlon=-80.6538936019621&bllat=40.663837671911615&bllon=-80.68890268809416&DEM_name=USGS/NED&tilewidth=300&printres=0.4&ntilesx=1&ntilesy=1&DEMresolution=3.95&basethick=0.5&zscale=2&fileformat=STLb&maptype=roadmap&gamma=1&transp=70&hsazi=315&hselev=45&map_lat=40.67280257439655&map_lon=-80.67264978151657&map_zoom=15,27
361,12/9/20,14:28,Topography printing project,Map,Map,3DP,(not set),United States,0,0,,trlat=40.6798792888513&trlon=-80.6536599846026&bllat=40.661097935905794&bllon=-80.68909822417702&DEM_name=USGS/NED&tilewidth=300&printres=0.4&ntilesx=1&ntilesy=1&DEMresolution=4&basethick=0.5&zscale=1.5&fileformat=STLb&maptype=roadmap&gamma=1&transp=40&hsazi=315&hselev=45&map_lat=40.670343692174164&map_lon=-80.6732673795363&map_zoom=15,27
344,1/12/20,22:01,For fun. Thank you so much.,Misc,Fun,3DP,Allentown,United States,40.6023,-75.4714,,(not set),27
351,4/24/20,19:19,tabletop! Really cool page!,Recreation,Gaming,3DP,Munich,Germany,48.1351,11.582,,(not set),27
356,5/15/20,18:26,to match with drone footage,Recreation,Drone,3DP,Oberlin,United States,41.2939,-82.2174,,(not set),27
363,12/15/20,05:00,Visualising holiday terrain,Recreation,Tourism,3DP,Randburg,South Africa,-26.1438,27.9952,"Winterton, South Africa",place=Winterton%2C%20South%20Africa&trlat=-28.784958915312753&trlon=29.54767313140078&bllat=-29.09681660493331&bllon=29.198981153840286&DEM_name=JAXA/ALOS/AW3D30/V2_2&tilewidth=80&printres=0.4&ntilesx=1&ntilesy=1&DEMresolution=169.98&basethick=2&zscale=1.5&fileformat=STLb&maptype=roadmap&gamma=1&transp=100&hsazi=315&hselev=45&map_lat=-28.950213956320248&map_lon=29.29533447272231&map_zoom=11,27
347,2/7/20,08:43,Testing possible solutions.,Test,Test,3DP,Dallas,United States,32.7767,-96.797,,(not set),27
349,3/31/20,20:20,3d printing a model to view,Test,Test,3DP,Berkeley,United States,37.8715,-122.273,,(not set),27
367,12/4/19,21:50,puzzle for a birthday gift,Crafts,Gift,3DP,Oatfield,United States,45.4129,-122.5921,,(not set),26
369,12/16/19,20:33,father's christmas present,Crafts,Gift,3DP,Lethbridge,Canada,49.6956,-112.8451,,(not set),26
375,5/17/20,10:41,making a carving as a gift,Crafts,Gift,CNC,Greenwood Village,United States,39.6172,-104.9508,,(not set),26
378,7/12/20,04:45,3d printing a puzzle gift.,Crafts,Gift,3DP,Gyor,Hungary,47.6875,17.6504,,(not set),26
385,12/14/20,12:12,Christmas gift for my dad!,Crafts,Gift,3DP,Athens,United States,32.2049,-95.8555,"Longview, TX, USA",place=Longview%2C%20TX%2C%20USA&trlat=32.57264517371468&trlon=-94.70950250957966&bllat=32.56741915451634&bllon=-94.7169953503936&DEM_name=USGS/NED&tilewidth=120&printres=0.2&ntilesx=1&ntilesy=1&DEMresolution=1.17&basethick=4&zscale=5&fileformat=STLb&maptype=hybrid&gamma=1&transp=20&hsazi=315&hselev=45&map_lat=32.56974189634308&map_lon=-94.7131773602488&map_zoom=17,26
386,12/14/20,17:58,model railroad landscaping,Crafts,Railroad ,3DP,Hillsboro,United States,45.5272,-122.9361,,trlat=45.7223252877048&trlon=-123.06079527206421&bllat=45.58200284177944&bllon=-123.24714800186159&DEM_name=USGS/NED&tilewidth=80&printres=0.4&ntilesx=1&ntilesy=1&DEMresolution=72.63&basethick=1&zscale=2&fileformat=STLb&maptype=terrain&gamma=1&transp=20&hsazi=315&hselev=45&map_lat=45.68091682306072&map_lon=-123.18865947316422&map_zoom=11,26
370,1/20/20,05:59,Fun with #D modelling/art.,Design,Art,3DP,Melbourne,Australia,-37.8136,144.9631,,(not set),26
365,10/29/19,13:22,Educational Demonstrations,Education,Education,3DP,(not set),United States,0,0,,(not set),26
368,12/8/19,13:21,4th grade landform project,Education,Elementary School,3DP,Bellevue,United States,47.6101,-122.2015,,(not set),26
374,4/24/20,06:41,University student project,Education,College,3DP,Bilbao,Spain,43.263,-2.935,,(not set),26
384,12/1/20,03:09,Student Project ETH Z�_rich,Education,College,3DP,Zurich,Switzerland,47.3769,8.5417,,trlat=47.619598759439135&trlon=7.663304989940305&bllat=47.538974775545235&bllon=7.5593211108509495&DEM_name=USGS/SRTMGL1_003&tilewidth=80&printres=0.45&ntilesx=1&ntilesy=1&DEMresolution=48.89&basethick=1&zscale=1.0&fileformat=STLb&maptype=roadmap&gamma=1&transp=20&hsazi=315&hselev=45&map_lat=47.61130163146582&map_lon=7.595695431866729&map_zoom=12,26
371,1/20/20,23:07,terrain of my neighborhood,Map,Neighborhood,3DP,Belmont,United States,37.5202,-122.2758,,(not set),26
372,1/20/20,23:12,terrain in my neighborhood,Map,Neighborhood,3DP,Belmont,United States,37.5202,-122.2758,,(not set),26
373,2/7/20,16:36,Mammoth Cave National Park,Map,Park,3DP,Laguna Niguel,United States,33.5237,-117.7149,,(not set),26
377,6/12/20,21:52,cnc carving of the smokies,Map,Mountains,CNC,Pontotoc,United States,34.2479,-88.9987,,(not set),26
379,7/27/20,01:03,"personal use, where i live",Map,Neighborhood,3DP,Valley Center,United States,33.2184,-117.0342,,(not set),26
381,10/11/20,17:14,print at home for a friend,Map,Property,3DP,South Hill,United States,47.1257,-122.293,,(not set),26
380,8/8/20,11:51,Playing with my 3d printer,Misc,Fun,3DP,Nashua,United States,42.7654,-71.4676,,(not set),26
364,9/30/19,14:44,Commemorate a camping trip,Recreation,Camping,3DP,Troutman,United States,35.7007,-80.8881,,(not set),26
376,5/27/20,14:58,Print for the Ranch cabin.,Recreation,Tourism,3DP,San Antonio,United States,29.4241,-98.4936,,(not set),26
366,11/5/19,09:09,a test of printing terrain,Test,Test,3DP,Colorado Springs,United States,38.8339,-104.8214,,(not set),26
383,10/19/20,02:38,Experimenting with 3d maps,Test,Test,3DP,Rangiora,New Zealand,-43.304,172.5905,,trlat=44.746076744164014&trlon=-107.89200778428167&bllat=44.45273016368441&bllon=-108.34189221571833&DEM_name=USGS/NED&tilewidth=80&printres=0.4&ntilesx=1&ntilesy=1&DEMresolution=178.59&basethick=1&zscale=1.0&fileformat=STLb&maptype=roadmap&gamma=1&transp=20&hsazi=315&hselev=45&map_lat=-43.06582847821796&map_lon=170.16071450259722&map_zoom=7,26
394,1/20/20,05:19,3d printing key chain fob,Crafts,Crafts,3DP,Corfu,Greece,39.625,19.9223,,(not set),25
395,2/11/20,20:55,wood carving for a friend,Crafts,Carving,CNC,Brooklyn Park,United States,45.0941,-93.3563,,(not set),25
396,4/20/20,10:39,Wood carving for a friend,Crafts,Carving,CNC,Shelton,United States,47.2151,-123.1007,,(not set),25
398,6/7/20,13:24,concept art illustrations,Design,Art,3DP,Paramaribo,Suriname,5.852,-55.2038,,(not set),25
399,6/27/20,10:27,Architectural competition,Design,Architecture,3DP,Portsmouth,United Kingdom,50.8198,-1.088,,(not set),25
400,7/12/20,05:56,Architectural Competition,Design,Architecture,3DP,Gelendzhik,Russia,44.562,38.0905,,(not set),25
409,11/19/20,00:27,How GIS work for 3D Model,Design,3D Design,3DP,Addis Ababa,Ethiopia,8.9806,38.7578,,trlat=44.74110604719096&trlon=-107.9179765827179&bllat=44.4577566761454&bllon=-108.31592341728211&DEM_name=USGS/NED&tilewidth=80&printres=0.4&ntilesx=1&ntilesy=1&DEMresolution=157.97&basethick=1&zscale=1.0&fileformat=STLb&maptype=roadmap&gamma=1&transp=20&hsazi=315&hselev=45&map_lat=44.59982&map_lon=-108.11695&map_zoom=11,25
387,10/23/19,15:40,high school demonstration,Education,High School,3DP,Licking,United States,37.4995,-91.8571,,(not set),25
390,11/14/19,14:45,A DIDACTIC MUSEUM DISPLAY,Education,Museum,3DP,Trento,Italy,46.0748,11.1217,,(not set),25
401,7/14/20,13:35,own use of my living area,Map,Property,3DP,Vienna,Austria,48.2082,16.3738,,(not set),25
403,9/15/20,11:25,I live on Tablerock lake.,Map,Property,3DP,Cassville,United States,36.677,-93.8688,,(not set),25
404,10/3/20,07:59,3D print of friends house,Map,Property,3DP,Ross Township,United States,40.5368,-80.02,,(not set),25
406,10/14/20,21:40,3D print for personal use,Misc,Personal,3DP,Puchong,Malaysia,3.0327,101.6188,malaysia,place=malaysia&trlat=7.671402613355788&trlon=119.5099728726268&bllat=0.23800182391624702&bllon=99.22499919165381&DEM_name=USGS/NED&tilewidth=80&printres=0.4&ntilesx=1&ntilesy=1&DEMresolution=11263.86&basethick=1&zscale=1.0&fileformat=STLb&maptype=roadmap&gamma=1&transp=20&hsazi=315&hselev=45&map_lat=-3.101347493801718&map_lon=109.8508844696403&map_zoom=6,25
407,10/14/20,21:42,3d print for personal use,Misc,Personal,3DP,Puchong,Malaysia,3.0327,101.6188,,trlat=7.893411927528795&trlon=119.79570030597304&bllat=0.20798440685971517&bllon=98.56169044402695&DEM_name=JAXA/ALOS/AW3D30/V2_2&tilewidth=80&printres=0.4&ntilesx=1&ntilesy=1&DEMresolution=11789.47&basethick=1&zscale=1.0&fileformat=STLb&maptype=roadmap&gamma=1&transp=20&hsazi=315&hselev=45&map_lat=-1.3841428046178375&map_lon=109.3984219375&map_zoom=5,25
408,11/6/20,16:03,personal model collection,Misc,Personal,3DP,Colombo,Sri Lanka,6.9271,79.8612,,trlat=6.861182557818057&trlon=81.06420058014719&bllat=6.836275308634205&bllon=81.03928598764266&DEM_name=USGS/NED&tilewidth=80&printres=0.4&ntilesx=1&ntilesy=1&DEMresolution=13.77&basethick=4&zscale=3&fileformat=obj&maptype=hybrid&gamma=1&transp=20&hsazi=360&hselev=45&map_lat=6.853011492931948&map_lon=81.05361010136929&map_zoom=15,25
392,1/6/20,13:32,Ski Touring Mt. Tamarack!,Recreation,Ski,3DP,Palo Alto,United States,37.4419,-122.143,,(not set),25
397,5/30/20,04:00,Planning for future treks,Recreation,Hiking,3DP,Las Vegas,United States,36.1699,-115.1398,,(not set),25
405,10/13/20,05:43,view our holiday rides :),Recreation,Tourism,3DP,Southampton,United Kingdom,50.9097,-1.4044,,bllat=47.04759717919976&bllon=10.591464940106361&DEM_name=JAXA/ALOS/AW3D30/V2_2&tilewidth=80&printres=0.4&ntilesx=1&ntilesy=1&DEMresolution=6.73&basethick=1&zscale=1.0&fileformat=STLb,25
389,11/5/19,09:21,zoomed test on pikes peak,Test,Test,3DP,Colorado Springs,United States,38.8339,-104.8214,,(not set),25
391,11/22/19,12:04,attempt 2 maybe lower res,Test,Test,3DP,Chilliwack,Canada,49.1579,-121.9515,,(not set),25
393,1/8/20,03:31,First test to try in CNC.,Test,Test,CNC,Melbourne,Australia,-37.8136,144.9631,,(not set),25
402,8/20/20,04:22,Personal 3d printing test,Test,Test,3DP,Ovre Eiker Municipality,Norway,59.796,9.8519,,(not set),25
415,1/26/20,20:29,CNC cut map of scotland!,Crafts,Carving,CNC,Blaine,United States,45.1608,-93.2349,,(not set),24
417,3/4/20,15:46,CNC Machining in Plywood,Crafts,Carving,CNC,Melbourne,Australia,-37.8136,144.9631,,(not set),24
418,4/15/20,17:31,to 3d print a box lid :),Crafts,Crafts,3DP,Brookline,United States,42.3318,-71.1212,,(not set),24
419,4/26/20,20:17,CNC a topo for a box lid,Crafts,Crafts,CNC,Ashland,United States,42.1946,-122.7095,,(not set),24
431,10/23/20,10:26,Sentimental holiday gift,Crafts,Gift,3DP,Missoula,United States,46.8721,-113.994,"Twin Falls, ID, USA",place=Twin%20Falls%2C%20ID%2C%20USA&trlat=42.666307338073494&trlon=-114.15474869763447&bllat=42.49947676984415&bllon=-114.70244862591815&DEM_name=USGS/NED&tilewidth=180&printres=0.4&ntilesx=1&ntilesy=1&DEMresolution=224.8&basethick=3&zscale=4&fileformat=STLb&maptype=roadmap&gamma=1&transp=20&hsazi=315&hselev=45&map_lat=42.559344324054656&map_lon=-114.49794532736092&map_zoom=11,24
433,11/5/20,11:56,designing a dining table,Crafts,Furniture,3DP,Providence,United States,41.824,-71.4128,,trlat=84.43149523321537&trlon=-19.439277256202686&bllat=-84.07708082761695&bllon=-169.9440368062974&DEM_name=USGS/NED&tilewidth=80&printres=0.4&ntilesx=1&ntilesy=1&DEMresolution=83770.14&basethick=1&zscale=1.0&fileformat=STLb&maptype=roadmap&gamma=1&transp=20&hsazi=315&hselev=45&map_lat=6.175463907428251&map_lon=-29.76616524737722&map_zoom=1,24
412,11/1/19,06:42,ARCHITECTURAL SITE MODEL,Design,Architecture,3DP,London,United Kingdom,51.5074,-0.1278,,(not set),24
420,4/28/20,01:21,Architecture Competition,Design,Architecture,3DP,(not set),Hong Kong,0,0,,(not set),24
428,7/25/20,19:52,architecture competition,Design,Architecture,3DP,Winnipeg,Canada,49.8951,-97.1384,,(not set),24
413,11/13/19,08:15,a fab lab class activity,Education,Education,3DP,Piqua,United States,40.1448,-84.2424,,(not set),24
423,6/1/20,01:41,Class of 2020 Graduation,Education,Education,3DP,Battle Ground,United States,45.7808,-122.5477,,(not set),24
427,7/22/20,03:55,for educational purposes,Education,Education,3DP,(not set),Greece,0,0,,(not set),24
410,9/28/19,14:48,This is my neighborhood.,Map,Neighborhood,3DP,Reidville,United States,34.8629,-82.1143,,(not set),24
425,7/14/20,15:00,Topo image for residence,Map,Property,3DP,King George,United States,38.2665,-77.1808,,(not set),24
426,7/17/20,07:00,Printing my neighborhood,Map,Neighborhood,3DP,Ankara,Turkey,39.9334,32.8597,,(not set),24
421,5/6/20,01:46,for the sake of interest,Misc,Personal,3DP,Pretoria,South Africa,-25.7479,28.2293,,(not set),24
424,6/13/20,10:37,Just for fun/ unsure yet,Misc,Fun,3DP,Sunnyside,United States,45.4337,-122.5519,,(not set),24
414,1/5/20,07:46,Planning visit Goldcoast,Recreation,Tourism,3DP,Trondheim Municipality,Norway,63.421,10.3216,,(not set),24
432,11/4/20,18:33,residential ski rope tug,Recreation,Ski,3DP,Ithaca,United States,42.444,-76.5019,"Deputron Hollow Rd, New York, USA",place=Deputron%20Hollow%20Rd%2C%20New%20York%2C%20USA&trlat=42.35254404112517&trlon=-76.39853839514689&bllat=42.3335121473578&bllon=-76.4318594777389&DEM_name=USGS/NED&tilewidth=80&printres=0.4&ntilesx=1&ntilesy=1&DEMresolution=13.73&basethick=1&zscale=1.0&fileformat=STLb&maptype=roadmap&gamma=1&transp=90&hsazi=315&hselev=45&map_lat=42.34030175067081&map_lon=-76.41816009519533&map_zoom=15,24
411,10/7/19,10:21,print on a Prusa printer,Test,Test,3DP,Stockholm,Sweden,59.3293,18.0686,,(not set),24
416,1/29/20,10:01,For 3D printing of model,Test,Test,3DP,Old Town,United States,44.9342,-68.6453,,(not set),24
422,5/25/20,11:34,just a good old 3d print,Test,Test,3DP,Rohnert Park,United States,38.3396,-122.7011,,(not set),24
429,10/17/20,12:06,"testing, exercise, learn",Test,Test,3DP,Mainz,Germany,49.9929,8.2473,Matterhorn,place=Matterhorn&trlat=45.99419863699554&trlon=7.68628534368514&bllat=45.958409519741345&bllon=7.6300497897555575&DEM_name=USGS/NED&tilewidth=80&printres=0.2&ntilesx=1&ntilesy=1&DEMresolution=10.9&basethick=2&zscale=1.0&fileformat=STLb&maptype=roadmap&gamma=1&transp=20&hsazi=315&hselev=45&map_lat=45.97631058378807&map_lon=7.658167566720349&map_zoom=14,24
430,10/19/20,05:11,"hobby, might 3d print it",Test,Test,3DP,East London,South Africa,-33.0292,27.8546,,trlat=-33.13430107707074&trlon=27.70533523879685&bllat=-33.157531240225126&bllon=27.668883571249648&DEM_name=USGS/NED&tilewidth=80&printres=0.4&ntilesx=1&ntilesy=1&DEMresolution=17&basethick=1&zscale=1.0&fileformat=STLb&maptype=roadmap&gamma=1&transp=20&hsazi=315&hselev=45&map_lat=-33.14880064557962&map_lon=27.687463456613212&map_zoom=15,24
436,10/20/19,16:05,Present for my parents.,Crafts,Gift,3DP,Bergen Municipality,Norway,60.3341,5.381,,(not set),23
444,2/10/20,19:52,porcelain volcano vases,Crafts,Crafts,3DP,Los Angeles,United States,34.0522,-118.2437,,(not set),23
450,3/1/20,08:33,Creating a map i=on cnc,Crafts,Hobby,CNC,Greeley,United States,40.4233,-104.7091,,(not set),23
452,5/3/20,12:00,CNC mothers day project,Crafts,Gift,CNC,Colwood,Canada,48.4288,-123.4889,,(not set),23
453,5/9/20,10:21,Gift for my best friend,Crafts,Gift,3DP,Austin,United States,30.2672,-97.7431,,(not set),23
456,5/24/20,17:35,Making model for inlaws,Crafts,Gift,3DP,(not set),United States,0,0,,(not set),23
457,5/24/20,22:05,a fun gift for a friend,Crafts,Gift,3DP,Kalispell,United States,48.192,-114.3168,,(not set),23
458,6/2/20,13:18,For a gift for a friend,Crafts,Gift,3DP,Bolzano,Italy,46.4983,11.3548,,(not set),23
462,7/29/20,14:15,Present for a map geek!,Crafts,Gift,3DP,Gardena,United States,33.8883,-118.309,,(not set),23
435,9/17/19,12:25,mimarl��k b̦l�_m�_ projesi,Design,Architecture,3DP,Denizli,Turkey,37.783,29.0963,,(not set),23
439,11/1/19,06:48,SITE MODEL ARCHITECTURE,Design,Architecture,3DP,London,United Kingdom,51.5074,-0.1278,,(not set),23
461,7/25/20,14:25,Terrain in Blender 2.83,Design,3D Design,3DP,Middletown,United States,39.5151,-84.3983,,(not set),23
463,10/2/20,08:30,orthographic projection,Design,3D Design,3DP,Birmingham,United Kingdom,52.4862,-1.8904,,(not set),23
441,1/20/20,11:16,printing map for school,Education,Education,3DP,Auburn,United States,42.1945,-71.8356,,(not set),23
443,2/4/20,03:36,fdm modell for students,Education,Education,3DP,Stuttgart,Germany,48.7758,9.1829,,(not set),23
445,2/11/20,05:43,for educational purpose,Education,Education,3DP,Pune,India,18.5204,73.8567,,(not set),23
447,2/18/20,10:46,Classroom demonstration,Education,Teaching,3DP,Easton,United States,40.6884,-75.2207,,(not set),23
449,2/22/20,07:43,local survey - property,Map,Property,3DP,Cherry Hill,United States,39.9268,-75.0246,,(not set),23
454,5/9/20,19:17,House terran model base,Map,Property,3DP,Jasper,United States,34.4696,-84.429,,(not set),23
455,5/10/20,03:31,�����_����� �������_�������� ���_���_����,Map,Map,3DP,Kallithea,Greece,37.9557,23.6988,,(not set),23
459,6/16/20,12:45,cnc router home project,Map,Property,CNC,(not set),United Kingdom,0,0,,(not set),23
464,10/30/20,10:19,Building a summer house,Map,Property,3DP,Gothenburg,Sweden,57.7089,11.9746,"B̦nsv�_gen 126, Hen̴n, Sverige",place=B%C3%B6nsv%C3%A4gen%20126%2C%20Hen%C3%A5n%2C%20Sverige&trlat=44.743808018306865&trlon=-107.91416069335938&bllat=44.45502460625299&bllon=-108.31973930664063&DEM_name=USGS/NED&tilewidth=80&printres=0.4&ntilesx=1&ntilesy=1&DEMresolution=161&basethick=1&zscale=1.0&fileformat=STLb&maptype=roadmap&gamma=1&transp=20&hsazi=315&hselev=45&map_lat=58.23594545737037&map_lon=11.654699688360619&map_zoom=17,23
466,11/28/20,20:28,Personal use of my farm,Map,Farm,3DP,Pittsburgh,United States,40.4406,-79.9959,,trlat=41.48351839897924&trlon=-79.6950807915583&bllat=41.475809565702804&bllon=-79.70574227247752&DEM_name=USGS/NED&tilewidth=80&printres=0.4&ntilesx=1&ntilesy=1&DEMresolution=4.45&basethick=1&zscale=1.0&fileformat=STLb&maptype=roadmap&gamma=1&transp=20&hsazi=315&hselev=45&map_lat=41.47551938712733&map_lon=-79.69649192948609&map_zoom=14,23
467,12/15/20,07:24,Personal Property Model,Map,Property,3DP,Phoenix,United States,33.4484,-112.074,,trlat=34.40889105840515&trlon=-112.24138995475771&bllat=34.39885414624852&bllon=-112.2550549156189&DEM_name=USGS/NED&tilewidth=50&printres=0.4&ntilesx=1&ntilesy=1&DEMresolution=10.05&basethick=1&zscale=1.0&fileformat=STLb&maptype=roadmap&gamma=1&transp=20&hsazi=315&hselev=45&map_lat=34.403986555834585&map_lon=-112.2509861187347&map_zoom=16,23
440,12/4/19,14:12,3d printed contour maps,Misc,Personal,3DP,Longmont,United States,40.1672,-105.1019,,(not set),23
442,1/28/20,21:16,Satisfying my curiosity,Misc,Curious,3DP,Denver,United States,39.7392,-104.9902,,(not set),23
438,10/31/19,11:34,Backpacking route model,Recreation,Camping,3DP,New York,United States,40.7128,-74.006,,,23
446,2/11/20,17:48,Mountain bike trail map,Recreation,Biking,3DP,(not set),United Kingdom,0,0,,(not set),23
460,7/6/20,23:57,snowmobile zone mapping,Recreation,Snowmobile,3DP,Rigby,United States,43.6724,-111.915,,(not set),23
451,4/25/20,10:34,to test print precision,Test,Test,3DP,Brasilia,Brazil,-15.8267,-47.9218,,(not set),23
465,11/6/20,18:30,leaning and 3d printing,Test,Test,3DP,Evesham Township,United States,39.8523,-74.8858,"Mt St Helens, Washington 98616, USA",place=Mt%20St%20Helens%2C%20Washington%2098616%2C%20USA&trlat=46.23205204651563&trlon=-122.12380431437659&bllat=46.15647950795247&bllon=-122.24751598046888&DEM_name=USGS/NED&tilewidth=80&printres=0.4&ntilesx=1&ntilesy=1&DEMresolution=47.75&basethick=3&zscale=1.0&fileformat=STLb&maptype=roadmap&gamma=1&transp=20&hsazi=315&hselev=45&map_lat=46.19037180124304&map_lon=-122.17879369234461&map_zoom=13,23
468,10/18/19,22:01,"Printing, then casting",Crafts,Crafts,3DP,Bolingbrook,United States,41.6986,-88.0684,,(not set),22
473,1/25/20,05:14,Donation for Australia,Crafts,Gift,3DP,(not set),Liechtenstein,0,0,,(not set),22
480,8/6/20,18:34,to give to my teachers,Crafts,Gift,3DP,Elk City,United States,35.412,-99.4043,,(not set),22
486,11/8/20,11:47,Epoxy table top design,Crafts,Furniture,3DP,(not set),United States,0,0,,trlat=42.68507629079815&trlon=-96.51778117769244&bllat=42.670531563713915&bllon=-96.5471864149844&DEM_name=USGS/NED&tilewidth=80&printres=0.2&ntilesx=1&ntilesy=1&DEMresolution=6.03&basethick=2&zscale=2&fileformat=obj&maptype=roadmap&gamma=1&transp=20&hsazi=315&hselev=45&map_lat=42.67595952897336&map_lon=-96.53162548945365&map_zoom=15,22
487,11/28/20,03:55,3D printing for a gift,Crafts,Gift,3DP,Compiegne,France,49.4178,2.8261,"Plomb du Cantal, 15300 Saint-Jacques-des-Blats, France",place=Plomb%20du%20Cantal%2C%2015300%20Saint-Jacques-des-Blats%2C%20France&trlat=45.09427132675468&trlon=2.7996640029073294&bllat=45.04420596079316&bllon=2.7138404669881133&DEM_name=USGS/NED&tilewidth=200&printres=0.4&ntilesx=1&ntilesy=1&DEMresolution=13.52&basethick=1&zscale=1.0&fileformat=STLb&maptype=roadmap&gamma=1&transp=20&hsazi=315&hselev=45&map_lat=45.05616908056392&map_lon=2.757505935680906&map_zoom=13,22
469,11/16/19,12:09,Educacion y recreacion,Education,Education,3DP,Cordoba,Argentina,-31.4201,-64.1888,,(not set),22
474,2/4/20,03:40,FDM Model for students,Education,College,3DP,Stuttgart,Germany,48.7758,9.1829,,(not set),22
475,2/18/20,11:29,Classroom Demonstation,Education,Teaching,3DP,Easton,United States,40.6884,-75.2207,,(not set),22
481,8/17/20,11:12,Teaching geomorphology,Education,College,3DP,Norwich,United States,42.5312,-75.5235,,(not set),22
483,9/24/20,15:17,Study and plan my farm,Education,Education,3DP,Cacapava,Brazil,-23.0999,-45.7086,,(not set),22
472,1/8/20,16:30,geographic exploration,Map,Outdoors,3DP,Krakow,Poland,50.0647,19.945,,(not set),22
476,3/22/20,13:10,neighborhood exploring,Map,Neighborhood,3DP,Simi Valley,United States,34.2694,-118.7815,,(not set),22
478,5/26/20,17:11,GeoMap Chocolate Mould,Misc,Food,3DP,Werneck,Germany,49.9811,10.1007,,(not set),22
470,11/26/19,23:06,for testing 3d printer,Misc,Fun,3DP,Almaty,Kazakhstan,43.222,76.8512,,(not set),22
479,8/4/20,12:45,3D backcountry ski map,Recreation,Ski,3DP,South Burlington,United States,44.467,-73.171,,(not set),22
482,8/23/20,07:52,visual for kids hiking,Recreation,Hiking,3DP,Cedarburg,United States,43.2967,-87.9876,,(not set),22
484,10/26/20,12:08,print ski resort model,Recreation,Ski,3DP,Sault Ste. Marie,Canada,46.5136,-84.3357,"Boyne Highlands Resort, Highland Road, Harbor Springs, MI, USA",place=Boyne%20Highlands%20Resort%2C%20Highland%20Road%2C%20Harbor%20Springs%2C%20MI%2C%20USA&trlat=45.48537968497168&trlon=-84.9307825853115&bllat=45.464267731552994&bllon=-84.95393764870225&DEM_name=USGS/NED&tilewidth=80&printres=0.4&ntilesx=1&ntilesy=1&DEMresolution=9.05&basethick=1&zscale=1.0&fileformat=STLb&maptype=roadmap&gamma=1&transp=20&hsazi=315&hselev=45&map_lat=45.465407896001366&map_lon=-84.92935767077776&map_zoom=14,22
485,10/26/20,23:34,Virgina City Clue Game,Recreation,Gaming,3DP,Reno,United States,39.5296,-119.8138,,trlat=39.312707099857725&trlon=-119.65504070587158&bllat=39.29327930562526&bllon=-119.67379471130371&DEM_name=USGS/NED&tilewidth=80&printres=0.4&ntilesx=1&ntilesy=1&DEMresolution=8.09&basethick=1&zscale=2.5&fileformat=STLb&maptype=roadmap&gamma=1&transp=20&hsazi=315&hselev=45&map_lat=39.301068841423806&map_lon=-119.6628258817182&map_zoom=15,22
471,1/3/20,15:11,testing my new printer,Test,Test,3DP,Martins Ferry,United States,40.0959,-80.7245,,(not set),22
477,3/25/20,08:38,Querformat +H̦he+110mm,Test,Test,3DP,Munich,Germany,48.1351,11.582,,(not set),22
495,5/8/20,05:31,Wood map of Singapore,Crafts,Carving,3DP,Singapore,Singapore,1.3554,103.8677,,(not set),21
507,12/14/20,12:29,Wall hang at our camp,Crafts,Wall Art,3DP,Oxford,United States,39.7854,-75.9788,"Kirkwood, PA 17536, USA",place=Kirkwood%2C%20PA%2017536%2C%20USA&trlat=39.830513569558576&trlon=-76.01175128758072&bllat=39.79029485497848&bllon=-76.07384442627549&DEM_name=USGS/NED&tilewidth=80&printres=0.4&ntilesx=1&ntilesy=1&DEMresolution=26.59&basethick=1&zscale=1.0&fileformat=STLb&maptype=roadmap&gamma=1&transp=20&hsazi=315&hselev=45&map_lat=39.80539967067829&map_lon=-76.04387074053406&map_zoom=14,21
494,5/5/20,15:57,lockdown art - vcarve,Design,Art,CNC,Newark-on-Trent,United Kingdom,53.07,-0.8066,,(not set),21
488,10/24/19,20:36,College Geology Class,Education,College,3DP,Valdosta,United States,30.8327,-83.2785,,(not set),21
489,10/30/19,09:25,College Geology Class,Education,College,3DP,Valdosta,United States,30.8327,-83.2785,,(not set),21
491,2/7/20,16:46,Glacier National Park,Map,Park,3DP,Laguna Niguel,United States,33.5237,-117.7149,,(not set),21
493,3/24/20,11:32,My Dads old farm area,Map,Farm,3DP,Lafayette,United States,39.9936,-105.0897,,(not set),21
499,5/20/20,12:35,BUTTE CREEK WATERSHED,Map,Map,3DP,Arlington,United States,38.88,-77.1068,,(not set),21
503,7/27/20,02:25,print of where i live,Map,Property,3DP,Valley Center,United States,33.2184,-117.0342,,(not set),21
504,8/29/20,02:37,3D Mountain Education,Map,Mountains,3DP,Coquitlam,Canada,49.2838,-122.7932,,(not set),21
492,2/10/20,12:43,"Just for fun, thanks.",Misc,Fun,3DP,San Leandro,United States,37.7258,-122.1569,,(not set),21
506,12/1/20,18:05,"For Fun, conversation",Misc,Fun,3DP,Trexlertown,United States,40.5479,-75.6059,,trlat=48.865315943855364&trlon=-117.21105748245262&bllat=48.77003508464607&bllon=-117.35988074371359&DEM_name=USGS/NED&tilewidth=80&printres=0.4&ntilesx=1&ntilesy=1&DEMresolution=54.65&basethick=1&zscale=4&fileformat=STLb&maptype=roadmap&gamma=1&transp=20&hsazi=315&hselev=45&map_lat=48.82543041861022&map_lon=-117.30194860527061&map_zoom=12,21
500,6/28/20,11:52,Upcoming camping trip,Recreation,Camping,3DP,Whitby,Canada,43.8975,-78.9429,,(not set),21
502,7/22/20,06:05,paraglinding training,Recreation,Paraglider,3DP,Nimes,France,43.8367,4.3601,,(not set),21
496,5/11/20,07:44,Glacial Flow Modeling,Research,Research,3DP,Bangor,United States,40.8657,-75.2066,,(not set),21
498,5/17/20,03:38,Masterthesis research,Research,Research,3DP,Aalst,Belgium,50.9378,4.041,,(not set),21
490,1/27/20,05:28,testing my 3d printer,Test,Test,3DP,Istanbul,Turkey,41.0082,28.9784,,(not set),21
505,9/18/20,09:33,3D terrain print test,Test,Test,3DP,Cluj-Napoca,Romania,46.7712,23.6236,,(not set),21
511,10/20/19,16:01,Gift for my parents.,Crafts,Gift,3DP,Bergen Municipality,Norway,60.3341,5.381,,(not set),20
518,3/1/20,16:40,A gift for my friend,Crafts,Gift,3DP,Riverside,United States,33.9806,-117.3755,,(not set),20
521,3/28/20,21:28,3d print for a gift.,Crafts,Gift,3DP,Nelson,New Zealand,-41.2706,173.284,,(not set),20
523,4/21/20,06:40,cnc carving goodness,Crafts,Carving,CNC,Geelong,Australia,-38.1499,144.3617,,(not set),20
526,5/10/20,08:40,Mother's Day Present,Crafts,Gift,3DP,West Bloomfield Township,United States,42.5679,-83.3733,,(not set),20
531,7/14/20,02:28,3D Terrain sculpture,Crafts,Crafts,3DP,Sydney,Australia,-33.8688,151.2093,,(not set),20
535,9/15/20,09:06,3D print for family.,Crafts,Gift,3DP,Madison,United States,38.7359,-85.38,,(not set),20
539,10/17/20,12:09,present for a friend,Crafts,Gift,3DP,Segovia,Spain,40.9429,-4.1088,,trlat=23.285851137248805&trlon=-73.83660596732058&bllat=19.65032544640048&bllon=-85.20859998587524&DEM_name=USGS/NED&tilewidth=80&printres=0.4&ntilesx=1&ntilesy=1&DEMresolution=5893.12&basethick=1&zscale=5&fileformat=STLb&maptype=roadmap&gamma=1&transp=20&hsazi=315&hselev=45&map_lat=23.651003055855146&map_lon=-80.00600141409791&map_zoom=6,20
546,11/10/20,03:52,trial router cutting,Crafts,Carving,CNC,Perth,Australia,-31.9505,115.8605,,trlat=44.746076744164014&trlon=-107.89753099746704&bllat=44.45273016368441&bllon=-108.33636900253296&DEM_name=USGS/NED&tilewidth=80&printres=0.4&ntilesx=1&ntilesy=1&DEMresolution=174.21&basethick=1&zscale=1.0&fileformat=STLb&maptype=roadmap&gamma=1&transp=20&hsazi=315&hselev=45&map_lat=43.305438804208876&map_lon=-122.52931662280498&map_zoom=16,20
548,11/13/20,07:47,CNC carv a doorsign.,Crafts,Carving,CNC,(not set),Norway,0,0,,trlat=60.72504093529579&trlon=8.092810770706267&bllat=60.55907997010816&bllon=7.595836779312197&DEM_name=JAXA/ALOS/AW3D30/V2_2&tilewidth=250&printres=0.3&ntilesx=1&ntilesy=1&DEMresolution=32.63&basethick=0&zscale=5&fileformat=STLb&maptype=roadmap&gamma=1&transp=20&hsazi=315&hselev=45&map_lat=60.6384935290172&map_lon=7.784242293075638&map_zoom=11,20
549,11/13/20,07:51,CNC carve a doorsign,Crafts,Carving,CNC,(not set),Norway,0,0,,trlat=60.72504093529579&trlon=8.092810770706267&bllat=60.55907997010816&bllon=7.595836779312197&DEM_name=JAXA/ALOS/AW3D30/V2_2&tilewidth=250&printres=0.3&ntilesx=1&ntilesy=1&DEMresolution=32.63&basethick=1&zscale=3&fileformat=STLb&maptype=roadmap&gamma=1&transp=20&hsazi=315&hselev=45&map_lat=60.6384935290172&map_lon=7.784242293075638&map_zoom=11,20
554,12/14/20,13:22,CNC carving for gift,Crafts,Gift,CNC,Austin,United States,30.2672,-97.7431,"Santa Fe, NM, USA",place=Santa%20Fe%2C%20NM%2C%20USA&trlat=44.746076744164014&trlon=-107.83344408340454&bllat=44.45273016368441&bllon=-108.40045591659546&DEM_name=USGS/NED&tilewidth=80&printres=0.4&ntilesx=1&ntilesy=1&DEMresolution=225.09&basethick=1&zscale=1.0&fileformat=STLb&maptype=roadmap&gamma=1&transp=0&hsazi=315&hselev=45&map_lat=35.68159296076341&map_lon=-105.92270893421627&map_zoom=14,20
522,4/13/20,02:06,3D Modeling Software,Design,3D Design,3DP,San Diego,United States,32.7157,-117.1611,,(not set),20
524,5/4/20,10:31,architecture studies,Design,Architecture,3DP,Annemasse,France,46.1933,6.2342,,(not set),20
527,5/20/20,13:50,for augmented realty,Design,Augmented Reality,3DP,(not set),Romania,44.8913,28.7172,,(not set),20
528,6/16/20,12:26,Architecture contest,Design,Architecture,3DP,Rotterdam,Netherlands,51.9244,4.4777,,(not set),20
534,9/2/20,11:03,architecture project,Design,Architecture,3DP,Scranton,United States,41.409,-75.6624,,(not set),20
550,11/18/20,03:55,architecture project,Design,Architecture,3DP,Lakewood,United States,39.7047,-105.0814,,trlat=40.548271590043406&trlon=-104.76935843309668&bllat=39.445843713630204&bllon=-106.06726149400977&DEM_name=USGS/NED&tilewidth=80&printres=0.4&ntilesx=1&ntilesy=1&DEMresolution=554.19&basethick=1&zscale=1.0&fileformat=STLb&maptype=roadmap&gamma=1&transp=97&hsazi=315&hselev=45&map_lat=39.853004644465656&map_lon=-105.16677517561965&map_zoom=9,20
510,10/15/19,09:54,educational purposes,Education,Education,3DP,Toulouse,France,43.6047,1.4442,,(not set),20
520,3/24/20,04:57,Meteorology training,Education,College,3DP,Collonges-sous-Saleve,France,46.141,6.1449,,(not set),20
529,6/19/20,18:23,educational purpouse,Education,Education,3DP,(not set),Chile,0,0,,(not set),20
530,7/7/20,03:34,Educational purposes,Education,Education,3DP,Karachi,Pakistan,24.8607,67.0011,,(not set),20
536,9/26/20,01:55,Learning to 3d Print,Education,Learning,3DP,Surat,India,21.1702,72.8311,,(not set),20
537,10/11/20,09:06,learning 3d printing,Education,Learning,3DP,Dammam,Saudi Arabia,26.4207,50.0888,,(not set),20
541,10/21/20,04:50,Educational purposes,Education,Education,3DP,South Jordan,United States,40.5622,-111.9297,"Thingvellir, Iceland",place=Thingvellir%2C%20Iceland&trlat=44.746076744164014&trlon=-107.89200778428167&bllat=44.45273016368441&bllon=-108.34189221571833&DEM_name=USGS/NED&tilewidth=80&printres=0.4&ntilesx=1&ntilesy=1&DEMresolution=178.59&basethick=1&zscale=1.0&fileformat=STLb&maptype=roadmap&gamma=1&transp=20&hsazi=315&hselev=45&map_lat=64.23312734358085&map_lon=-21.191110219458636&map_zoom=11,20
545,11/5/20,10:02,Educational purposes,Education,Education,3DP,Gebze,Turkey,40.8025,29.4398,,trlat=40.7980909586908&trlon=29.497183729051567&bllat=40.75909434889424&bllon=29.42565904939074&DEM_name=USGS/NED&tilewidth=80&printres=0.4&ntilesx=1&ntilesy=1&DEMresolution=30.19&basethick=1&zscale=1.0&fileformat=STLb&maptype=roadmap&gamma=1&transp=20&hsazi=315&hselev=45&map_lat=40.77690921772472&map_lon=29.457387346862756&map_zoom=14,20
552,12/14/20,12:25,Elementary education,Education,Elementary School,3DP,Aspen,United States,39.1911,-106.8175,"Basalt, CO, USA",place=Basalt%2C%20CO%2C%20USA&trlat=39.47405584364762&trlon=-106.95655418617457&bllat=39.340714154767795&bllon=-107.12913109047143&DEM_name=USGS/NED&tilewidth=80&printres=0.4&ntilesx=1&ntilesy=1&DEMresolution=74.32&basethick=1&zscale=1.0&fileformat=STLb&maptype=roadmap&gamma=1&transp=20&hsazi=315&hselev=45&map_lat=39.396049213929594&map_lon=-107.02361656410426&map_zoom=12,20
532,7/22/20,12:26,County Elevation Map,Map,Map,3DP,Lawrenceburg,United States,39.0909,-84.85,,(not set),20
547,11/10/20,21:44,Property Development,Map,Property,3DP,Santa Clara,United States,37.3541,-121.9552,"St Thomas, 00802, USVI",place=St%20Thomas%2C%2000802%2C%20USVI&trlat=44.746076744164014&trlon=-107.83344408340454&bllat=44.45273016368441&bllon=-108.40045591659546&DEM_name=USGS/NED&tilewidth=50&printres=0.2&ntilesx=1&ntilesy=1&DEMresolution=180.07&basethick=1&zscale=1.0&fileformat=STLb&maptype=hybrid&gamma=1&transp=20&hsazi=315&hselev=45&map_lat=18.35256128795081&map_lon=-64.88971791084462&map_zoom=17,20
513,1/17/20,11:29,Rifle Training Range,Misc,Special,3DP,Boise,United States,43.615,-116.2023,,(not set),20
515,1/26/20,20:54,Personal 3d printing,Misc,Personal,3DP,Austin,United States,30.2672,-97.7431,,(not set),20
516,1/26/20,21:26,Personal 3d printing,Misc,Personal,3DP,Austin,United States,30.2672,-97.7431,,(not set),20
525,5/5/20,22:39,prezentation village,Misc,UNKNOWN,3DP,Spytihnev,Czechia,49.1412,17.4981,,(not set),20
538,10/13/20,23:03,non-profit reference,Misc,UNKNOWN,3DP,(not set),Puerto Rico,0,0,,(not set),20
514,1/22/20,01:27,CNC A MAP OF MY HIKE,Recreation,Hiking,CNC,Knik-Fairview,United States,61.5159,-149.612,,(not set),20
533,7/23/20,14:17,paragliding training,Recreation,Paraglider,3DP,(not set),France,0,0,,(not set),20
542,10/24/20,12:38,Hopefully for a game,Recreation,Gaming,3DP,Zurich,Switzerland,47.3769,8.5417,,trlat=49.15003717846847&trlon=-94.58120282262277&bllat=34.67458530717759&bllon=-124.98632367223212&DEM_name=USGS/NED&tilewidth=80&printres=0.4&ntilesx=1&ntilesy=1&DEMresolution=12612.71&basethick=1&zscale=1.0&fileformat=obj&maptype=roadmap&gamma=1&transp=20&hsazi=315&hselev=45&map_lat=42.39185582478225&map_lon=-106.58990595465426&map_zoom=5,20
509,10/7/19,16:09,Geoscience education,Research,Geology,3DP,Annandale,United States,38.8304,-77.1964,,(not set),20
544,10/31/20,13:45,Historical reasearch,Research,History,3DP,Prague,Czechia,50.0755,14.4378,"Zub���_, Czechia",place=Zub%C5%99%C3%AD%2C%20Czechia&trlat=44.746076744164014&trlon=-107.53848926938772&bllat=44.45273016368441&bllon=-108.69541073061228&DEM_name=USGS/NED&tilewidth=80&printres=0.4&ntilesx=1&ntilesy=1&DEMresolution=459.26&basethick=1&zscale=1.0&fileformat=obj&maptype=roadmap&gamma=1&transp=20&hsazi=315&hselev=45&map_lat=49.52704824138479&map_lon=18.064390147658816&map_zoom=10,20
551,11/25/20,04:57,Geoligacal exploring,Research,Geology,3DP,Ghent,Belgium,51.0543,3.7174,"Yosemite National Park, California, Verenigde Staten",place=Yosemite%20National%20Park%2C%20California%2C%20Verenigde%20Staten&trlat=37.91141085861945&trlon=-119.23031597477795&bllat=37.58565249941674&bllon=-119.79732780796887&DEM_name=USGS/NED&tilewidth=80&printres=0.2&ntilesx=1&ntilesy=1&DEMresolution=124.93&basethick=1&zscale=1.0&fileformat=obj&maptype=roadmap&gamma=1&transp=40&hsazi=315&hselev=45&map_lat=37.748934991896384&map_lon=-119.51382189137341&map_zoom=11,20
508,9/16/19,08:24,sample 2 color print,Test,Test,3DP,Herkimer,United States,43.0256,-74.986,,(not set),20
512,11/19/19,18:41,printing a map in 3D,Test,Test,3DP,Christchurch,New Zealand,-43.5321,172.6362,,(not set),20
519,3/18/20,15:02,Just checking it out,Test,Test,3DP,(not set),United Kingdom,0,0,,(not set),20
543,10/25/20,09:53,3d filament printing,Test,Test,3DP,Fearrington,United States,35.8065,-79.0733,,trlat=36.345517372881936&trlon=-80.47007132120018&bllat=36.33514673390599&bllon=-80.48565428502445&DEM_name=USGS/NED&tilewidth=250&printres=0.35&ntilesx=1&ntilesy=1&DEMresolution=1.96&basethick=5&zscale=1.0&fileformat=STLb&maptype=roadmap&gamma=1&transp=0&hsazi=315&hselev=45&map_lat=36.34059170731819&map_lon=-80.47880694068554&map_zoom=16,20
556,10/1/19,16:14,Trophy for a friend,Crafts,Trophy,3DP,Emporia,United States,38.4039,-96.1817,,(not set),19
558,10/28/19,06:33,cnc carving on wood,Crafts,Carving,CNC,Aberdeen,United States,45.4647,-98.4865,,(not set),19
559,11/15/19,23:17,Present for my wife,Crafts,Gift,3DP,Melbourne,Australia,-37.8136,144.9631,,(not set),19
563,1/27/20,23:53,Present for someone,Crafts,Gift,3DP,Beaverton,United States,45.4889,-122.8014,,(not set),19
580,10/12/20,18:45,making a 3D carving,Crafts,Carving,CNC,Ithaca,United States,42.444,-76.5019,,(not set),19
582,10/24/20,08:43,Carving a door sign,Crafts,Crafts,CNC,Lorenskog Municipality,Norway,59.9238,10.9542,,trlat=60.74025201727305&trlon=8.067893778610213&bllat=60.582840518153255&bllon=7.585947310256969&DEM_name=USGS/NED&tilewidth=80&printres=0.4&ntilesx=1&ntilesy=1&DEMresolution=131.77&basethick=2&zscale=1.0&fileformat=STLb&maptype=roadmap&gamma=1&transp=20&hsazi=315&hselev=45&map_lat=60.69190448096273&map_lon=7.819024121093747&map_zoom=11,19
583,10/26/20,16:50,Christnmas orniment,Crafts,Crafts,3DP,Ottawa,Canada,45.4215,-75.6972,,trlat=49.60983292007438&trlon=-121.57306691474915&bllat=48.999956819267894&bllon=-123.39557429618836&DEM_name=JAXA/ALOS/AW3D30/V2_2&tilewidth=80&printres=0.4&ntilesx=1&ntilesy=1&DEMresolution=662.7&basethick=1&zscale=1.0&fileformat=STLb&maptype=roadmap&gamma=1&transp=20&hsazi=315&hselev=45&map_lat=49.408476195083225&map_lon=-122.708668150757&map_zoom=9,19
561,1/21/20,18:00,personal decoration,Design,Decoration,3DP,Toccoa,United States,34.5773,-83.3324,,(not set),19
564,1/28/20,11:51,architecture school,Design,Architecture,3DP,San Luis Obispo,United States,35.2828,-120.6596,,(not set),19
568,6/11/20,22:04,Architecture school,Design,Architecture,3DP,Wellington,New Zealand,-41.2865,174.7762,,(not set),19
571,7/9/20,21:39,landscaping project,Design,Architecture,3DP,Cebu City,Philippines,10.3157,123.8854,,(not set),19
572,7/20/20,08:44,Topo Model in Rhino,Design,3D Design,3DP,Long Beach,United States,33.7701,-118.1937,,(not set),19
573,8/5/20,21:31,Classroom Education,Design,Architecture,3DP,Winston-Salem,United States,36.0999,-80.2442,,(not set),19
578,9/23/20,10:25,architectural model,Design,Architecture,3DP,Seattle,United States,47.6062,-122.3321,,(not set),19
581,10/14/20,18:50,architecture school,Design,Architecture,3DP,Ames,United States,42.0308,-93.6319,,trlat=42.031265919336974&trlon=-93.63455291591433&bllat=41.99300244299674&bllon=-93.69078846984391&DEM_name=USGS/NED&tilewidth=80&printres=0.4&ntilesx=1&ntilesy=1&DEMresolution=23.29&basethick=0.5&zscale=1.0&fileformat=STLb&maptype=terrain&gamma=1&transp=0&hsazi=315&hselev=45&map_lat=42.01214065499567&map_lon=-93.66267069287912&map_zoom=14,19
584,10/30/20,05:18,Architecture Design,Design,Architecture,3DP,Shiraz,Iran,29.5918,52.5837,"Hamburg, Germany",place=Hamburg%2C%20Germany&trlat=53.50791219808828&trlon=10.057877336590954&bllat=53.49597886183409&bllon=10.035149548572399&DEM_name=USGS/NED&tilewidth=80&printres=0.4&ntilesx=1&ntilesy=1&DEMresolution=7.54&basethick=1&zscale=1.0&fileformat=STLb&maptype=roadmap&gamma=1&transp=20&hsazi=315&hselev=45&map_lat=53.50273363123642&map_lon=10.048217048030388&map_zoom=15,19
560,1/20/20,11:07,printing for school,Education,Education,3DP,Auburn,United States,42.1945,-71.8356,,(not set),19
557,10/6/19,14:49,Land use evaluation,Map,Land Use,3DP,Blanding,United States,37.6242,-109.4782,,(not set),19
565,2/5/20,12:50,just a home project,Map,Property,3DP,Jonesboro,United States,35.8423,-90.7043,,(not set),19
577,9/19/20,02:43,3d print of my home,Map,Property,3DP,Graham,United States,47.0529,-122.2943,,(not set),19
574,9/6/20,21:42,personal collection,Misc,Personal,3DP,Los Angeles,United States,34.0522,-118.2437,,(not set),19
579,9/24/20,11:24,Personal curisosity,Misc,Personal,3DP,Dammam,Saudi Arabia,26.4207,50.0888,,(not set),19
555,9/14/19,00:23,planning ski routes,Recreation,Ski,3DP,San Carlos,United States,37.5072,-122.2605,,(not set),19
570,7/6/20,17:15,snowmobiling access,Recreation,Snowmobile,3DP,Rigby,United States,43.6724,-111.915,,(not set),19
569,6/21/20,09:06,to map sacred sites,Research,Archeology,3DP,Nairobi,Kenya,-1.2921,36.8219,,(not set),19
576,9/16/20,18:30,Geological refrence,Research,Geology,3DP,Chicago,United States,41.8781,-87.6298,,(not set),19
562,1/25/20,17:14,3d terrain printing,Test,Test,3DP,Sandy,United States,40.565,-111.839,,(not set),19
566,3/26/20,23:26,3D printing for fun,Test,Test,3DP,West Falls Church,United States,38.8646,-77.1878,,(not set),19
585,9/11/19,09:26,a mural on my wall,Crafts,Wall Art,3DP,Saskatoon,Canada,52.1332,-106.6701,,(not set),18
587,10/2/19,05:51,souvenir for my GF,Crafts,Gift,3DP,Pyatigorsk,Russia,44.0499,43.0396,,(not set),18
590,12/20/19,00:02,Terrain gift model,Crafts,Gift,3DP,Victoria,Canada,48.4284,-123.3656,,(not set),18
593,1/15/20,13:55,"CnC router, Hobby.",Crafts,Carving,CNC,Salt Lake City,United States,40.7608,-111.891,,(not set),18
596,3/7/20,04:02,Present to climber,Crafts,Gift,3DP,Ingolstadt,Germany,48.7665,11.4258,,(not set),18
601,4/8/20,07:57,Wood carved relief,Crafts,Carving,CNC,Anaheim,United States,33.8366,-117.9143,,(not set),18
602,5/5/20,08:20,A birthday Present,Crafts,Gift,3DP,(not set),United States,0,0,,(not set),18
604,6/12/20,16:38,CNC router carving,Crafts,Carving,CNC,(not set),United States,36.1962,-82.0704,,(not set),18
610,8/6/20,17:59,Possible CNC Model,Crafts,Carving,CNC,El Cajon,United States,32.7948,-116.9625,,(not set),18
611,8/9/20,13:57,CNC relief carving,Crafts,Carving,CNC,Utica,United States,43.1009,-75.2327,,(not set),18
612,8/13/20,15:45,3D printing a gift,Crafts,Gift,3DP,League City,United States,29.5075,-95.0949,,(not set),18
613,8/18/20,22:12,A gift for Grandma,Crafts,Gift,3DP,Bozeman,United States,45.677,-111.0429,,(not set),18
618,9/25/20,10:33,3d print as a gift,Crafts,Gift,3DP,Birkenhead,United Kingdom,53.39,-3.023,,(not set),18
620,11/23/20,11:47,Wood working hobby,Crafts,Carving,3DP,Encinitas,United States,33.037,-117.292,,trlat=44.678252225169906&trlon=-108.00662895507813&bllat=44.521148826701555&bllon=-108.22727104492188&DEM_name=USGS/NED&tilewidth=80&printres=0.4&ntilesx=1&ntilesy=1&DEMresolution=87.59&basethick=1&zscale=1.0&fileformat=STLb&maptype=roadmap&gamma=1&transp=20&hsazi=315&hselev=45&map_lat=44.59982&map_lon=-108.11695&map_zoom=11,18
591,1/10/20,08:55,architecture model,Design,Architecture,3DP,(not set),Hong Kong,0,0,,(not set),18
599,3/31/20,05:30,Architecture model,Design,Architecture,3DP,Glendale,United States,34.1425,-118.2551,,(not set),18
597,3/22/20,13:51,for kids at school,Education,Education,3DP,Bucharest,Romania,44.4268,26.1025,,(not set),18
600,4/8/20,07:00,virtual field trip,Education,Field Trip,3DP,Greenville,United States,35.6127,-77.3664,,(not set),18
603,5/16/20,18:46,teaching geography,Education,Education,3DP,Ashland,United States,42.1946,-122.7095,,(not set),18
609,7/26/20,19:07,personal education,Education,Education,3DP,New York,United States,40.7128,-74.006,,(not set),18
614,8/31/20,03:26,university project,Education,College,3DP,Adelaide,Australia,-34.9285,138.6007,,(not set),18
586,9/22/19,20:02,FivePeaksPineCreek,Map,Map,3DP,Columbus,United States,39.9612,-82.9988,,(not set),18
605,6/21/20,08:51,map cultural sites,Map,map,3DP,Nairobi,Kenya,-1.2921,36.8219,,(not set),18
608,7/22/20,12:27,Area Elevation Map,Map,Map,3DP,Lawrenceburg,United States,39.0909,-84.85,,(not set),18
616,9/11/20,03:25,mongol terrain 30m,Map,Map,3DP,Ulaanbaatar,Mongolia,47.8864,106.9057,,(not set),18
622,11/29/20,18:52,model of farm land,Map,Farm,3DP,Richland,United States,37.857,-92.4043,,trlat=37.949320790243476&trlon=-92.47609158821105&bllat=37.897904986089216&bllon=-92.54032870597841&DEM_name=USGS/NED&tilewidth=225&printres=0.4&ntilesx=1&ntilesy=1&DEMresolution=10.04&basethick=1&zscale=7.5&fileformat=STLb&maptype=roadmap&gamma=1&transp=20&hsazi=315&hselev=45&map_lat=37.93117991221096&map_lon=-92.53527238515053&map_zoom=13,18
588,11/8/19,04:23,personal curiosity,Misc,Curious,3DP,(not set),Spain,0,0,,(not set),18
589,12/4/19,04:59,personal enjoyment,Misc,Personal,3DP,Garfield Township,United States,44.7123,-85.664,,(not set),18
598,3/22/20,23:50,Personal reference,Misc,Personal,3DP,Nobleton,Canada,43.9022,-79.6527,,(not set),18
607,7/18/20,18:41,lifeguard training,Misc,Special,3DP,San Diego,United States,32.7157,-117.1611,,(not set),18
619,11/12/20,18:10,for hobby printing,Misc,Personal,3DP,Houston,United States,29.7604,-95.3698,,trlat=40.00157236630994&trlon=63.7282941692352&bllat=25.15953636811756&bllon=43.73897770576475&DEM_name=USGS/NED&tilewidth=80&printres=0.4&ntilesx=1&ntilesy=1&DEMresolution=9384.27&basethick=1&zscale=1.0&fileformat=STLb&maptype=roadmap&gamma=1&transp=30&hsazi=315&hselev=45&map_lat=25.811715752585226&map_lon=58.8752375&map_zoom=4,18
592,1/14/20,00:02,Documenting a trip,Recreation,Tourism,3DP,Colorado Springs,United States,38.8339,-104.8214,,(not set),18
606,7/15/20,23:32,ski field planning,Recreation,Ski,3DP,Wellington,New Zealand,-41.2865,174.7762,,(not set),18
615,9/2/20,00:57,geologic interests,Research,Geology,3DP,Pataskala,United States,39.9956,-82.6743,,(not set),18
594,1/22/20,09:31,3d printing sample,Test,Test,3DP,Saratoga Springs,United States,43.0831,-73.7846,,(not set),18
595,1/25/20,19:52,Just to try it out,Test,Test,3DP,Placitas,United States,35.307,-106.4248,,(not set),18
621,11/23/20,12:16,3d print for study,Test,Test,3DP,(not set),Czechia,0,0,,trlat=50.226851304747385&trlon=12.695144211578352&bllat=50.1967499905649&bllon=12.621859108734101&DEM_name=USGS/NED&tilewidth=80&printres=0.4&ntilesx=1&ntilesy=1&DEMresolution=26.16&basethick=1&zscale=1.0&fileformat=STLb&maptype=roadmap&gamma=1&transp=20&hsazi=315&hselev=45&map_lat=50.193414896502205&map_lon=12.613063764917802&map_zoom=12,18
623,12/2/20,15:52,test visualisation,Test,Test,3DP,Prague,Czechia,50.0755,14.4378,,trlat=49.3000248734873&trlon=20.21582789471989&bllat=49.03063727270168&bllon=19.64393086484318&DEM_name=USGS/NED&tilewidth=80&printres=0.4&ntilesx=1&ntilesy=1&DEMresolution=208.54&basethick=1&zscale=1.0&fileformat=STLb&maptype=roadmap&gamma=1&transp=20&hsazi=315&hselev=45&map_lat=49.16574326376295&map_lon=19.929879379781536&map_zoom=11,18
626,10/11/19,11:54,Print for my son.,Crafts,Gift,3DP,Annandale,United States,38.8304,-77.1964,,(not set),17
627,11/1/19,17:21,casting in bronze,Crafts,Crafts,3DP,Salt Lake City,United States,40.7608,-111.891,,(not set),17
636,2/9/20,11:04,CNC hobby cutting,Crafts,Carving,CNC,Hamilton,Canada,43.2557,-79.8711,,(not set),17
638,2/29/20,06:23,a gift for sister,Crafts,Gift,3DP,Bratislava,Slovakia,48.1486,17.1077,,(not set),17
647,7/1/20,19:22,a retirement gift,Crafts,Gift,3DP,Raleigh,United States,35.7796,-78.6382,,(not set),17
648,7/4/20,14:35,Thank you plaques,Crafts,Trophy,3DP,Nampa,United States,43.5788,-116.5598,,(not set),17
649,7/13/20,17:57,Personal CNC sign,Crafts,Carving,CNC,(not set),United States,0,0,,(not set),17
660,10/14/20,12:48,Hiking buddy gift,Crafts,Gift,3DP,Getzville,United States,43.0233,-78.7681,,(not set),17
624,10/2/19,08:11,to teach students,Education,Education,3DP,Baku,Azerbaijan,40.4093,49.8671,,(not set),17
629,11/14/19,09:17,Educational Model,Education,Education,3DP,Herndon,United States,38.9696,-77.3861,,(not set),17
634,2/2/20,09:16,Class assignment!,Education,Education,3DP,London,United Kingdom,51.5074,-0.1278,,(not set),17
642,4/29/20,08:37,education purpose,Education,Education,3DP,Trikala,Greece,39.5557,21.7679,,(not set),17
645,5/12/20,12:16,teaching purposes,Education,Education,3DP,(not set),Germany,48.4985,11.2389,,(not set),17
646,5/22/20,11:08,A school project.,Education,School Project,3DP,Irvine,United States,33.6846,-117.8265,,(not set),17
656,9/23/20,10:37,Cartography class,Education,College,3DP,Terre Haute,United States,39.4667,-87.4139,,(not set),17
659,10/11/20,08:11,learning 3D print,Education,Learning,3DP,Dammam,Saudi Arabia,26.4207,50.0888,,(not set),17
661,10/16/20,14:31,education project,Education,School Project,3DP,Kyiv,Ukraine,50.4501,30.5234,,trlat=50.95534883992275&trlon=32.55389390122392&bllat=41.939818813785195&bllon=14.40951523911455&DEM_name=JAXA/ALOS/AW3D30/V2_2&tilewidth=50&printres=0.2&ntilesx=1&ntilesy=1&DEMresolution=5576.59&basethick=1&zscale=1.0&fileformat=obj&maptype=roadmap&gamma=1&transp=0&hsazi=315&hselev=45&map_lat=46.87135414710289&map_lon=23.48170457016924&map_zoom=6,17
663,11/5/20,12:36,A college project,Education,College,3DP,Nacogdoches,United States,31.6035,-94.6555,,trlat=31.801799967046872&trlon=-94.56708750068674&bllat=31.75043362517455&bllon=-94.62289532958992&DEM_name=USGS/NED&tilewidth=80&printres=0.4&ntilesx=1&ntilesy=1&DEMresolution=26.43&basethick=1&zscale=1.0&fileformat=STLb&maptype=roadmap&gamma=1&transp=20&hsazi=315&hselev=45&map_lat=31.785245161853958&map_lon=-94.61401766478548&map_zoom=13,17
631,1/23/20,19:28,2 home litomerice,Map,Property,3DP,Prague,Czechia,50.0755,14.4378,,(not set),17
641,4/26/20,20:14,Lonely Hart 1-5 x,Map,Map,3DP,Yorkville,United States,41.6411,-88.4473,,(not set),17
654,9/11/20,03:18,mongol 3d terrain,Map,Map,3DP,Ulaanbaatar,Mongolia,47.8864,106.9057,,(not set),17
625,10/9/19,13:00,Personal interest,Misc,Personal,3DP,Rome,Italy,41.9028,12.4964,,(not set),17
628,11/3/19,08:41,"Hobby,interesting",Misc,Personal,3DP,Hodmezovasarhely,Hungary,46.4181,20.33,,(not set),17
632,1/25/20,11:30,For personnel use,Misc,Personal,3DP,Strasbourg,France,48.5734,7.7521,,(not set),17
633,1/29/20,16:29,Fun and education,Misc,Fun,3DP,Lewisville,United States,33.0462,-96.9942,,(not set),17
635,2/6/20,04:40,For personal use.,Misc,Personal,3DP,Belo Horizonte,Brazil,-19.9173,-43.9346,,(not set),17
639,4/8/20,02:10,for my 3d printer,Misc,Fun,3DP,Pordenone,Italy,45.9626,12.6551,,(not set),17
640,4/13/20,10:35,fun and education,Misc,Fun,3DP,Page,United States,36.9147,-111.4558,,(not set),17
643,4/30/20,13:35,personal memories,Misc,Personal,3DP,Zug,Switzerland,47.1662,8.5155,,(not set),17
651,8/24/20,02:48,just a bit of fun,Misc,Fun,3DP,(not set),United Kingdom,0,0,,(not set),17
657,10/1/20,15:42,Kicks and giggles,Misc,Personal,3DP,Moorestown,United States,39.9689,-74.9489,,(not set),17
658,10/1/20,16:42,hobby 3d printing,Misc,Personal,3DP,London,United Kingdom,51.5074,-0.1278,,(not set),17
662,10/16/20,18:18,shits and giggles,Misc,Personal,3DP,San Diego,United States,32.7157,-117.1611,,trlat=45.29313873424145&trlon=-111.37023459123894&bllat=45.18951517693955&bllon=-111.478146788948&DEM_name=USGS/NED&tilewidth=80&printres=0.4&ntilesx=1&ntilesy=1&DEMresolution=42.36&basethick=0&zscale=1.5&fileformat=STLb&maptype=roadmap&gamma=0.3&transp=70&hsazi=270&hselev=55&map_lat=45.24100521603525&map_lon=-111.45719815349565&map_zoom=13,17
664,12/1/20,18:08,"Fun, conversation",Misc,Fun,3DP,Trexlertown,United States,40.5479,-75.6059,,trlat=48.734600911179996&trlon=-117.3966518619198&bllat=48.72693711812843&bllon=-117.40827074433749&DEM_name=USGS/NED&tilewidth=80&printres=0.4&ntilesx=1&ntilesy=1&DEMresolution=4.27&basethick=1&zscale=1.25&fileformat=STLb&maptype=roadmap&gamma=1&transp=20&hsazi=315&hselev=45&map_lat=48.73396791894464&map_lon=-117.40349127139037&map_zoom=15,17
650,7/20/20,12:45,Hiking in Austria,Recreation,Hiking,3DP,Ouddorp,Netherlands,51.8091,3.9352,,(not set),17
644,5/11/20,07:48,Glacial modelling,Research,Research,3DP,Bangor,United States,40.8657,-75.2066,,(not set),17
652,9/2/20,00:49,geologic interest,Research,Geology,3DP,Pataskala,United States,39.9956,-82.6743,,(not set),17
655,9/23/20,08:22,Academic analysis,Research,Research,3DP,Carolina,Puerto Rico,18.3808,-65.9574,,(not set),17
630,12/18/19,01:16,Trying my new cnc,Test,Test,CNC,(not set),Germany,0,0,,(not set),17
653,9/9/20,06:06,Trying out on Cnc,Test,Test,CNC,(not set),Malta,0,0,,(not set),17
665,10/11/19,18:45,Birthday Present,Crafts,Gift,3DP,Omaha,United States,41.2565,-95.9345,,(not set),16
666,11/14/19,08:51,cnc router trial,Crafts,Carving,CNC,Niagara Falls,United States,43.0962,-79.0377,,(not set),16
673,2/7/20,20:10,birthday present,Crafts,Gift,3DP,Burnsville,United States,35.9173,-82.301,,(not set),16
681,4/25/20,02:55,Present for boss,Crafts,Gift,3DP,Auckland,New Zealand,-36.8485,174.7633,,(not set),16
682,5/7/20,15:53,CNC wood carving,Crafts,Carving,CNC,Vancouver,United States,45.6257,-122.6761,,(not set),16
689,6/27/20,10:18,CNC Router Carve,Crafts,Carving,CNC,(not set),United States,0,0,,(not set),16
697,10/14/20,02:20,Birthday present,Crafts,Gift,3DP,Graz,Austria,47.0707,15.4395,,(not set),16
704,11/7/20,20:33,gift for parents,Crafts,Gift,3DP,Worcester,United States,42.2626,-71.8023,"Westtown, NY 10998, USA",place=Westtown%2C%20NY%2010998%2C%20USA&trlat=41.40774395739912&trlon=-74.43203179327541&bllat=41.253060746851204&bllon=-74.7155394980102&DEM_name=USGS/NED&tilewidth=80&printres=0.4&ntilesx=1&ntilesy=1&DEMresolution=118.67&basethick=1&zscale=1.0&fileformat=STLb&maptype=roadmap&gamma=1&transp=20&hsazi=315&hselev=45&map_lat=41.32009514959179&map_lon=-74.54384767056428&map_zoom=12,16
706,11/11/20,12:39,gift for parents,Crafts,Gift,3DP,Worcester,United States,42.2626,-71.8023,,trlat=41.40774395739912&trlon=-74.43203179327541&bllat=41.253060746851204&bllon=-74.7155394980102&DEM_name=USGS/NED&tilewidth=300&printres=0.4&ntilesx=1&ntilesy=1&DEMresolution=31.64&basethick=1&zscale=2&fileformat=STLb&maptype=roadmap&gamma=1&transp=20&hsazi=315&hselev=45&map_lat=41.32009514959179&map_lon=-74.54384767056428&map_zoom=12,16
688,6/23/20,14:52,Videogamb dezine,Design,Video Game,3DP,North Laurel,United States,39.139,-76.8705,,(not set),16
671,1/30/20,00:46,Privat education,Education,Education,3DP,Bergisch Gladbach,Germany,50.9923,7.1286,,(not set),16
694,9/25/20,14:26,Teaching a class,Education,Teaching,3DP,Ashburn,United States,39.0438,-77.4874,,(not set),16
696,10/8/20,04:01,ACADEMIC PUEPOSE,Education,Education,3DP,Patna,India,25.5941,85.1376,,(not set),16
708,11/13/20,21:17,student research,Education,education,3DP,Bryan,United States,30.6744,-96.37,"Handies Peak, Colorado 81235, USA",place=Handies%20Peak%2C%20Colorado%2081235%2C%20USA&trlat=44.711591144802604&trlon=-107.9570402748108&bllat=44.487562966104186&bllon=-108.27685972518921&DEM_name=USGS/NED&tilewidth=80&printres=0.4&ntilesx=1&ntilesy=1&DEMresolution=126.96&basethick=1&zscale=1.0&fileformat=obj&maptype=roadmap&gamma=1&transp=20&hsazi=315&hselev=45&map_lat=37.913052176701505&map_lon=-107.5045031&map_zoom=14,16
709,11/25/20,03:04,teaching purpose,Education,education,3DP,Delft,Netherlands,52.0116,4.3571,,trlat=-7.690705092577709&trlon=112.9011028882095&bllat=-8.098785592556546&bllon=112.40733324251856&DEM_name=JAXA/ALOS/AW3D30/V2_2&tilewidth=80&printres=0.4&ntilesx=1&ntilesy=1&DEMresolution=272.24&basethick=1&zscale=1.0&fileformat=STLb&maptype=roadmap&gamma=0.3&transp=0&hsazi=360&hselev=55&map_lat=-7.988027171529638&map_lon=112.68932218261155&map_zoom=11,16
674,3/11/20,12:42,home area 3d map,Map,Property,3DP,Simi Valley,United States,34.2694,-118.7815,,(not set),16
680,4/24/20,18:40,3D print of area,Map,Map,3DP,Richmond Hill,Canada,43.8828,-79.4403,,(not set),16
683,5/10/20,11:56,Local area model,Map,Neighborhood,3DP,Dublin,Ireland,53.3498,-6.2603,,(not set),16
685,5/31/20,19:42,Home CNC Routing,Map,Map,CNC,Tauranga,New Zealand,-37.6878,176.1651,,(not set),16
690,8/1/20,19:11,Terrain modeling,Map,Map,3DP,Middletown,United States,39.5151,-84.3983,,(not set),16
691,8/1/20,19:18,Terrain Modeling,Map,Map,3DP,Middletown,United States,39.5151,-84.3983,,(not set),16
692,8/7/20,12:37,my neighbor hood,Map,Neighborhood,3DP,Kingwood,United States,39.472,-79.6873,,(not set),16
693,8/30/20,20:47,Map for my house,Map,Property,3DP,Grand Junction,United States,39.0639,-108.5506,,(not set),16
698,10/17/20,12:03,3d print of city,Map,Neighborhood,3DP,Calgary,Canada,51.0447,-114.0719,,trlat=53.66676546842693&trlon=-113.3178567555403&bllat=53.41732646900825&bllon=-113.77333160905593&DEM_name=JAXA/ALOS/AW3D30/V2_2&tilewidth=80&printres=0.4&ntilesx=1&ntilesy=1&DEMresolution=150.97&basethick=1&zscale=10&fileformat=STLb&maptype=hybrid&gamma=1&transp=20&hsazi=315&hselev=45&map_lat=53.55122158867843&map_lon=-113.52568146257155&map_zoom=11,16
707,11/12/20,19:46,Mountain viewing,Map,Mountains,3DP,Fort Collins,United States,40.5853,-105.0844,,trlat=38.023261861100494&trlon=-107.76569384007422&bllat=37.984914687887894&bllon=-107.82444852261513&DEM_name=USGS/NED&tilewidth=200&printres=0.4&ntilesx=1&ntilesy=1&DEMresolution=10.32&basethick=1&zscale=1.0&fileformat=STLb&maptype=roadmap&gamma=1&transp=70&hsazi=315&hselev=45&map_lat=38.00212487595115&map_lon=-107.80072125463455&map_zoom=14,16
667,12/7/19,01:32,Personal projec5,Misc,Personal,3DP,Oroville,United States,48.939,-119.4356,,(not set),16
668,12/8/19,14:23,personal project,Misc,Personal,3DP,Nantucket,United States,41.2835,-70.0994,,(not set),16
669,1/22/20,23:23,personal intrest,Misc,Personal,3DP,(not set),United States,0,0,,(not set),16
670,1/27/20,23:55,Personal project,Misc,Personal,3DP,Beaverton,United States,45.4889,-122.8014,,(not set),16
678,4/8/20,15:16,general interest,Misc,Personal,3DP,Pelham,United States,42.7345,-71.3245,,(not set),16
687,6/13/20,17:48,personal project,Misc,Personal,3DP,Los Angeles,United States,34.0522,-118.2437,,(not set),16
695,10/3/20,06:08,personal project,Misc,Personal,3DP,Addis Ababa,Ethiopia,8.9806,38.7578,,(not set),16
705,11/11/20,09:39,for personal use,Misc,Personal,3DP,Madrid,Spain,40.4168,-3.7038,,trlat=37.47349730856606&trlon=-4.237944654722085&bllat=37.47161551891565&bllon=-4.240371428293741&DEM_name=USGS/NED&tilewidth=80&printres=0.2&ntilesx=1&ntilesy=1&DEMresolution=0.54&basethick=2&zscale=1.0&fileformat=STLb&maptype=hybrid&gamma=1&transp=20&hsazi=315&hselev=45&map_lat=37.472960930185565&map_lon=-4.2403006625482575&map_zoom=17,16
710,12/7/20,19:56,personal project,Misc,Personal,3DP,Saint Joseph,United States,40.1117,-88.0417,,trlat=56.492506396165695&trlon=-2.948035205078141&bllat=56.444525916083876&bllon=-3.0350103027343844&DEM_name=USGS/NED&tilewidth=200&printres=0.4&ntilesx=1&ntilesy=1&DEMresolution=10.72&basethick=2&zscale=1.25&fileformat=STLb&maptype=roadmap&gamma=1&transp=20&hsazi=315&hselev=45&map_lat=56.470168156654786&map_lon=-2.991751021893405&map_zoom=13,16
676,4/7/20,08:20,Model of Camp x3,Recreation,Camping,3DP,Phoenix,United States,43.2312,-76.3008,,(not set),16
677,4/7/20,08:40,final camp map ?,Recreation,Camping,3DP,Phoenix,United States,43.2312,-76.3008,,(not set),16
701,10/22/20,10:05,para uma maquete,Recreation,Gaming,3DP,Sao Paulo,Brazil,-23.5505,-46.6333,,trlat=44.74110604719096&trlon=-107.9179765827179&bllat=44.4577566761454&bllon=-108.31592341728211&DEM_name=USGS/NED&tilewidth=80&printres=0.4&ntilesx=1&ntilesy=1&DEMresolution=157.97&basethick=1&zscale=1.0&fileformat=STLb&maptype=roadmap&gamma=1&transp=20&hsazi=270&hselev=45&map_lat=-1.5220377788481447&map_lon=29.249456599999977&map_zoom=14,16
702,11/4/20,06:40,Hopefully a game,Recreation,Gaming,3DP,(not set),Switzerland,0,0,,trlat=48.96350268645539&trlon=-95.3673162109375&bllat=35.10806737891532&bllon=-124.7337712890625&DEM_name=USGS/NED&tilewidth=300&printres=0.2&ntilesx=1&ntilesy=1&DEMresolution=1621.11&basethick=1&zscale=1.25&fileformat=GeoTiff&maptype=roadmap&gamma=1&transp=20&hsazi=315&hselev=45&map_lat=44.90208459375302&map_lon=-106.66526983482254&map_zoom=5,16
711,12/10/20,13:01,relieve asturias,Recreation,Tourism,3DP,Gijon,Spain,43.5322,-5.6611,,trlat=43.70287819222823&trlon=-4.422387681931769&bllat=42.66411868150523&bllon=-7.359971605271626&DEM_name=JAXA/ALOS/AW3D30/V2_2&tilewidth=180&printres=0.4&ntilesx=1&ntilesy=1&DEMresolution=530.71&basethick=2&zscale=5&fileformat=STLb&maptype=roadmap&gamma=1&transp=20&hsazi=315&hselev=45&map_lat=43.34652933610544&map_lon=-5.927786432236952&map_zoom=9,16
712,12/10/20,13:01,relieve asturias,Recreation,Tourism,3DP,Gijon,Spain,43.5322,-5.6611,,trlat=43.70287819222823&trlon=-4.422387681931769&bllat=42.66411868150523&bllon=-7.359971605271626&DEM_name=JAXA/ALOS/AW3D30/V2_2&tilewidth=180&printres=0.4&ntilesx=1&ntilesy=1&DEMresolution=530.71&basethick=2&zscale=5&fileformat=STLb&maptype=roadmap&gamma=1&transp=20&hsazi=315&hselev=45&map_lat=43.34652933610544&map_lon=-5.927786432236952&map_zoom=9,16
684,5/10/20,15:11,Gold Prospecting,Research,Geology,3DP,Murrieta,United States,33.5539,-117.2139,,(not set),16
672,1/30/20,14:29,testing on Form3,Test,Test,3DP,(not set),United States,0,0,,(not set),16
675,4/5/20,01:12,rhino. trying to,Test,Test,3DP,Long Beach,United States,33.7701,-118.1937,,(not set),16
679,4/24/20,17:27,3d printed trial,Test,Test,3DP,Taupo,New Zealand,-38.6857,176.0702,,(not set),16
686,6/3/20,08:21,learning with sw,Test,Test,3DP,Prague,Czechia,50.0755,14.4378,,(not set),16
699,10/19/20,17:43,I don't know yet,Test,Test,3DP,Pontevedra,Spain,42.4299,-8.6446,"Mourente, Espa̱a",place=Mourente%2C%20Espa%C3%B1a&trlat=42.464983963954644&trlon=-8.57013174308529&bllat=42.404107290197025&bllon=-8.670438760650077&DEM_name=USGS/NED&tilewidth=80&printres=0.4&ntilesx=1&ntilesy=1&DEMresolution=41.27&basethick=1&zscale=1.0&fileformat=STLb&maptype=roadmap&gamma=1&transp=20&hsazi=315&hselev=45&map_lat=42.43184947421222&map_lon=-8.638159665096659&map_zoom=13,16
703,11/6/20,02:46,v carve pro test,Test,Test,CNC,Perth,Australia,-31.9505,115.8605,,trlat=44.746076744164014&trlon=-107.89753099746704&bllat=44.45273016368441&bllon=-108.33636900253296&DEM_name=USGS/NED&tilewidth=80&printres=0.4&ntilesx=1&ntilesy=1&DEMresolution=174.21&basethick=1&zscale=1.0&fileformat=obj&maptype=roadmap&gamma=1&transp=20&hsazi=315&hselev=45&map_lat=21.4942869354186&map_lon=-158.14930928735905&map_zoom=14,16
721,12/17/19,17:19,3D print a gift,Crafts,Gift,3DP,Philadelphia,United States,39.9526,-75.1652,,(not set),15
729,2/4/20,08:06,cnc woodworking,Crafts,Carving,CNC,Springfield,United States,42.1015,-72.5898,,(not set),15
730,2/12/20,15:32,wall decoration,Crafts,Wall Art,3DP,Waterford,Ireland,52.2593,-7.1101,,(not set),15
736,4/21/20,09:05,wall decoration,Crafts,Wall Art,3DP,Horw,Switzerland,47.0184,8.3079,,(not set),15
737,4/26/20,14:40,laser cut a map,Crafts,Hobby,Laser,Canandaigua,United States,42.8875,-77.2817,,(not set),15
743,5/29/20,16:23,for father gift,Crafts,Gift,3DP,(not set),France,0,0,,(not set),15
750,8/14/20,07:34,gift for my mom,Crafts,Gift,3DP,Beckett Ridge,United States,39.347,-84.4352,,(not set),15
751,8/18/20,14:14,3d printed gift,Crafts,Gift,3DP,Frisco,United States,33.1507,-96.8236,,(not set),15
752,8/21/20,19:47,Gift for friend,Crafts,Gift,3DP,Sunnyvale,United States,37.3688,-122.0364,,(not set),15
754,9/20/20,20:45,3d wood carving,Crafts,Carving,CNC,Liberty Lake,United States,47.6743,-117.1124,,(not set),15
756,9/27/20,17:19,Present for mom,Crafts,Gift,3DP,Hooper,United States,41.1638,-112.1224,,(not set),15
762,11/13/20,14:32,wall decoration,Crafts,Wall Art,3DP,Ledyard,United States,41.4456,-72.0182,"Fort Wayne, IN 46819, USA",place=Fort%20Wayne%2C%20IN%2046819%2C%20USA&trlat=44.72500224874797&trlon=-107.94071098632813&bllat=44.47402794755841&bllon=-108.29318901367188&DEM_name=USGS/NED&tilewidth=180&printres=0.4&ntilesx=1&ntilesy=1&DEMresolution=62.19&basethick=1&zscale=1.0&fileformat=STLb&maptype=roadmap&gamma=1&transp=20&hsazi=315&hselev=45&map_lat=40.94644990333394&map_lon=-85.09014342885146&map_zoom=17,15
763,11/23/20,14:59,gift for my dad,Crafts,Gift,3DP,Charles Town,United States,39.289,-77.8597,"Leadville, CO 80461, USA",place=Leadville%2C%20CO%2080461%2C%20USA&trlat=39.71070144969779&trlon=-105.74054857559204&bllat=38.92451122378288&bllon=-106.95575376815798&DEM_name=USGS/NED&tilewidth=100&printres=0.4&ntilesx=1&ntilesy=1&DEMresolution=419.19&basethick=1&zscale=4&fileformat=STLb&maptype=roadmap&gamma=1&transp=0&hsazi=180&hselev=45&map_lat=39.35709873147422&map_lon=-106.38685745837401&map_zoom=8,15
765,12/14/20,08:54,3d print a gift,Crafts,Gift,3DP,Plain City,United States,41.298,-112.0861,,trlat=43.64760143653254&trlon=-73.49057279459079&bllat=43.58596051441074&bllon=-73.57022367349704&DEM_name=USGS/NED&tilewidth=80&printres=0.4&ntilesx=1&ntilesy=1&DEMresolution=32.15&basethick=5&zscale=1.25&fileformat=STLb&maptype=roadmap&gamma=1&transp=20&hsazi=315&hselev=45&map_lat=43.6293916726971&map_lon=-73.58807645670016&map_zoom=11,15
723,1/11/20,23:22,Home decoration,Design,Decoration,3DP,(not set),United States,0,0,,(not set),15
715,10/27/19,18:51,education model,Education,Education,3DP,Sunshine Coast,Australia,-26.65,153.0667,,(not set),15
717,10/29/19,16:08,educational use,Education,Education,3DP,Milwaukee,United States,43.0389,-87.9065,,(not set),15
719,11/8/19,04:30,School 3d Class,Education,Education,3DP,Shrewsbury,United States,42.2959,-71.7128,,(not set),15
726,1/16/20,17:45,Library program,Education,Library,3DP,Oklahoma City,United States,35.4676,-97.5164,,(not set),15
760,10/24/20,05:58,student project,Education,Education,3DP,Sydney,Australia,-33.8688,151.2093,"Sydney NSW, Australia",place=Sydney%20NSW%2C%20Australia&trlat=-33.14763323058435&trlon=151.36410368049616&bllat=-34.51640193058367&bllon=149.77200162971488&DEM_name=USGS/NED&tilewidth=80&printres=0.4&ntilesx=1&ntilesy=1&DEMresolution=736.87&basethick=1&zscale=1.0&fileformat=STLb&maptype=roadmap&gamma=1&transp=20&hsazi=315&hselev=45&map_lat=-33.76970955671621&map_lon=150.1711715515899&map_zoom=9,15
761,11/6/20,13:27,School projects,Education,School Project,3DP,Cody,United States,44.5263,-109.0565,"Cooke City-Silver Gate, MT, USA",place=Cooke%20City-Silver%20Gate%2C%20MT%2C%20USA&trlat=45.01398185827857&trlon=-109.84359239836058&bllat=44.94112360959334&bllon=-109.94933580656371&DEM_name=USGS/NED&tilewidth=80&printres=0.4&ntilesx=1&ntilesy=1&DEMresolution=41.7&basethick=1&zscale=1.0&fileformat=STLb&maptype=roadmap&gamma=1&transp=10&hsazi=315&hselev=45&map_lat=44.967499158002916&map_lon=-109.90161394377074&map_zoom=13,15
713,9/29/19,11:43,topographic cnc,Map,Map,CNC,Wisconsin Rapids,United States,44.3836,-89.8173,,(not set),15
714,10/6/19,13:41,Land Use Review,Map,Land Use,3DP,Blanding,United States,37.6242,-109.4782,,(not set),15
718,11/3/19,04:39,Modell Hung��ria,Map,Map,3DP,Hodmezovasarhely,Hungary,46.4181,20.33,,(not set),15
720,11/16/19,08:20,landscape model,Map,Landscape,3DP,Luhacovice,Czechia,49.0998,17.7575,,(not set),15
735,4/16/20,21:43,swisshome house,Map,Property,3DP,Medford,United States,42.3265,-122.8756,,(not set),15
738,4/28/20,23:07,printer 3d mape,Map,Map,3DP,Mueang Chiang Rai,Thailand,19.9105,99.8406,,(not set),15
740,5/6/20,22:34,Ohio Pyle SP 01,Map,Park,3DP,Yorkville,United States,41.6411,-88.4473,,(not set),15
747,8/7/20,12:31,its of my house,Map,Property,3DP,Kingwood,United States,39.472,-79.6873,,(not set),15
757,10/12/20,12:45,plannning trail,Map,Park,3DP,Laurel,United States,39.0993,-76.8483,,(not set),15
764,12/1/20,17:37,Landscape Model,Map,Landscape,3DP,Lincoln,United States,40.8136,-96.7026,,trlat=44.746076744164014&trlon=-107.74265309638977&bllat=44.45273016368441&bllon=-108.49124690361023&DEM_name=USGS/NED&tilewidth=80&printres=0.4&ntilesx=1&ntilesy=1&DEMresolution=297.17&basethick=1&zscale=2&fileformat=STLb&maptype=roadmap&gamma=1&transp=0&hsazi=270&hselev=45&map_lat=36.59621322511915&map_lon=-93.51654298446928&map_zoom=13,15
722,1/11/20,16:08,"Hobby, Personal",Misc,Personal,3DP,Wasilla,United States,61.5809,-149.4411,,(not set),15
724,1/12/20,18:11,For testing/fun,Misc,Fun,3DP,Allentown,United States,40.6023,-75.4714,,(not set),15
725,1/12/20,20:46,For testing/fun,Misc,Fun,3DP,Allentown,United States,40.6023,-75.4714,,(not set),15
727,1/16/20,19:11,Fun. Thank you!,Misc,Fun,3DP,Allentown,United States,40.6023,-75.4714,,(not set),15
732,3/26/20,11:27,Muon Tomography,Misc,Special,3DP,Lubbock,United States,33.5779,-101.8552,,(not set),15
741,5/18/20,03:42,private purpose,Misc,Personal,3DP,Walldorf,Germany,49.3064,8.6428,,(not set),15
742,5/24/20,12:21,Fun! Thank you!,Misc,Fun,3DP,Fountain Valley,United States,33.709,-117.9544,,(not set),15
744,6/8/20,08:05,Hobby interests,Misc,Personal,3DP,(not set),Czechia,49.9361,17.9738,,(not set),15
745,6/11/20,12:39,just for myself,Misc,Personal,3DP,Abu Dhabi,United Arab Emirates,24.4539,54.3773,,(not set),15
759,10/16/20,18:08,shitsandgiggles,Misc,Personal,3DP,San Diego,United States,32.7157,-117.1611,,trlat=45.292769256792305&trlon=-111.36992172273601&bllat=45.189908983639896&bllon=-111.47074739849921&DEM_name=USGS/NED&tilewidth=80&printres=0.4&ntilesx=1&ntilesy=1&DEMresolution=39.58&basethick=1&zscale=1.25&fileformat=STLb&maptype=terrain&gamma=1&transp=100&hsazi=315&hselev=45&map_lat=45.25775660056581&map_lon=-111.46170518804064&map_zoom=12,15
753,9/19/20,16:00,Flight training,Recreation,Aviation,3DP,Albany,United States,42.6526,-73.7562,,(not set),15
716,10/27/19,21:52,wave generation,Research,Research,3DP,Onna,Japan,26.4976,127.853,,(not set),15
731,2/27/20,17:17,modelo derrumbe,Research,Research,3DP,(not set),Peru,0,0,,(not set),15
728,1/22/20,09:32,sample 3d print,Test,Test,3DP,Saratoga Springs,United States,43.0831,-73.7846,,(not set),15
733,3/31/20,11:22,Experimentation,Test,Test,3DP,Portland,United States,45.5051,-122.675,,(not set),15
734,4/8/20,00:04,Experimentation,Test,Test,3DP,Brisbane,Australia,-27.4698,153.0251,,(not set),15
746,8/3/20,14:32,cnc router test,Test,Test,CNC,Bishops Cleeve,United Kingdom,51.9474,-2.0609,,(not set),15
748,8/9/20,23:43,familiarisation,Test,Test,3DP,Ludhiana,India,30.901,75.8573,,(not set),15
755,9/25/20,04:46,Test 3D Printer,Test,Test,3DP,(not set),United States,0,0,,(not set),15
758,10/12/20,20:07,Testing Printer,Test,Test,3DP,Wellington,New Zealand,-41.2769,174.7731,,(not set),15
783,3/27/20,13:36,Convert to cnc,Crafts,Carving,CNC,Omaha,United States,41.2565,-95.9345,,(not set),14
791,5/13/20,14:32,cnc wood model,Crafts,Carving,CNC,Bern,Switzerland,46.948,7.4474,,(not set),14
792,5/28/20,11:19,bronze casting,Crafts,Crafts,3DP,Salt Lake City,United States,40.7608,-111.891,,(not set),14
804,10/14/20,13:20,Christmas gift,Crafts,Gift,3DP,Getzville,United States,43.0233,-78.7681,,(not set),14
809,10/27/20,16:39,CNC Carved Map,Crafts,Carving,CNC,Pomona,United States,34.0551,-117.75,,trlat=-17.46120046229886&trlon=-149.10683246335236&bllat=-17.909974052757228&bllon=-149.93705840787138&DEM_name=JAXA/ALOS/AW3D30/V2_2&tilewidth=80&printres=0.4&ntilesx=1&ntilesy=1&DEMresolution=440.4&basethick=1&zscale=1.0&fileformat=STLa&maptype=roadmap&gamma=1&transp=0&hsazi=315&hselev=45&map_lat=-17.653533821004743&map_lon=-149.6291076483558&map_zoom=10,14
822,11/25/20,15:26,Christmas gift,Crafts,Gift,3DP,Chicago,United States,41.8781,-87.6298,,trlat=44.67885996936102&trlon=-109.10150667495728&bllat=44.652001426062675&bllon=-109.1404881126404&DEM_name=USGS/NED&tilewidth=160&printres=0.4&ntilesx=1&ntilesy=1&DEMresolution=7.73&basethick=1&zscale=1.25&fileformat=STLb&maptype=roadmap&gamma=1&transp=20&hsazi=45&hselev=45&map_lat=44.661674147810196&map_lon=-109.12920025536442&map_zoom=13,14
829,12/11/20,14:54,Picture on CNC,Crafts,Hobby,CNC,Chesterfield,United States,38.6631,-90.5771,,trlat=45.43661072863781&trlon=-86.79100423624168&bllat=45.2840452539465&bllon=-86.97242885400901&DEM_name=USGS/NED&tilewidth=80&printres=0.2&ntilesx=1&ntilesy=1&DEMresolution=71.07&basethick=1&zscale=1.5&fileformat=STLb&maptype=hybrid&gamma=1&transp=20&hsazi=315&hselev=45&map_lat=45.39199832053273&map_lon=-86.92085982075692&map_zoom=11,14
803,9/28/20,02:23,graphic design,Design,Art,3DP,Los Angeles,United States,34.0522,-118.2437,,(not set),14
811,10/27/20,19:44,design graphic,Design,Art,3DP,Montreal,Canada,45.5017,-73.5673,,trlat=-16.342112620103173&trlon=-65.07297059364319&bllat=-56.08174727692854&bllon=-76.54178878135684&DEM_name=USGS/NED&tilewidth=80&printres=0.4&ntilesx=1&ntilesy=1&DEMresolution=5156.48&basethick=1&zscale=1.0&fileformat=STLb&maptype=roadmap&gamma=1&transp=20&hsazi=315&hselev=45&map_lat=-42.20527464999151&map_lon=-87.47161660947916&map_zoom=4,14
824,12/5/20,00:10,3d glass molds,Design,Art,3DP,Picnic Point-North Lynnwood,United States,47.862,-122.2945,,trlat=23.83099013994637&trlon=-154.08420240991785&bllat=17.926008182653245&bllon=-160.36442521353405&DEM_name=USGS/NED&tilewidth=100&printres=0.4&ntilesx=1&ntilesy=1&DEMresolution=2613.94&basethick=1&zscale=1.5&fileformat=STLb&maptype=roadmap&gamma=1&transp=20&hsazi=315&hselev=45&map_lat=22.284725925233833&map_lon=-157.75792771835805&map_zoom=6,14
767,10/4/19,19:41,school project,Education,School Project,3DP,Toronto,Canada,43.6532,-79.3832,,(not set),14
773,2/4/20,16:07,School project,Education,School Project,3DP,Eagle Mountain,United States,40.3141,-112.0069,,(not set),14
774,2/10/20,20:00,School Project,Education,School Project,3DP,Chaska,United States,44.7893,-93.6018,,(not set),14
777,2/25/20,07:17,school project,Education,School Project,3DP,Watertown,United States,41.6062,-73.1183,,(not set),14
778,3/22/20,19:24,school project,Education,School Project,3DP,Elk Grove,United States,38.4088,-121.3716,,(not set),14
793,6/11/20,17:20,School Project,Education,School Project,3DP,Las Vegas,United States,36.1699,-115.1398,,(not set),14
799,8/5/20,19:16,School Project,Education,School Project,3DP,Cupertino,United States,37.323,-122.0322,,(not set),14
802,9/23/20,05:26,i am a student,Education,Education,3DP,(not set),Turkey,0,0,,(not set),14
805,10/19/20,06:54,school project,Education,School Project,3DP,Brighton,United Kingdom,50.8225,-0.1372,"Crawley, UK",place=Crawley%2C%20UK&trlat=51.112440791338834&trlon=-0.05628302167866028&bllat=50.982938329095866&bllon=-0.27548888638381896&DEM_name=USGS/NED&tilewidth=80&printres=0.4&ntilesx=1&ntilesy=1&DEMresolution=76.86&basethick=1&zscale=1.0&fileformat=STLb&maptype=roadmap&gamma=1&transp=20&hsazi=315&hselev=45&map_lat=51.02965749206054&map_lon=-0.15661623967577087&map_zoom=12,14
806,10/21/20,16:01,for my lisence,Education,Education,3DP,Athens,Greece,37.9838,23.7275,,trlat=38.00166641507091&trlon=25.010447095091923&bllat=37.67981065192734&bllon=24.67017848318394&DEM_name=JAXA/ALOS/AW3D30/V2_2&tilewidth=80&printres=0.4&ntilesx=1&ntilesy=1&DEMresolution=149.76&basethick=1&zscale=1.0&fileformat=STLb&maptype=roadmap&gamma=0.3&transp=100&hsazi=315&hselev=55&map_lat=37.829192651656975&map_lon=24.85885221784887&map_zoom=11,14
807,10/24/20,07:25,school project,Education,School Project,3DP,Marrero,United States,29.8994,-90.1003,cuba,place=cuba&trlat=23.79668259227024&trlon=-73.56446489375001&bllat=19.506144137023323&bllon=-85.64942583125001&DEM_name=USGS/NED&tilewidth=80&printres=0.4&ntilesx=1&ntilesy=1&DEMresolution=6254.73&basethick=1&zscale=1.0&fileformat=STLb&maptype=roadmap&gamma=1&transp=20&hsazi=315&hselev=45&map_lat=20.4264241004614&map_lon=-78.72803911250001&map_zoom=6,14
814,11/2/20,13:10,School project,Education,School Project,3DP,Oxford,United States,39.507,-84.7452,,trlat=39.507806115732485&trlon=-84.7217936063818&bllat=39.504634075263155&bllon=-84.73144240627806&DEM_name=USGS/NED&tilewidth=80&printres=0.4&ntilesx=1&ntilesy=1&DEMresolution=4.15&basethick=1&zscale=1.0&fileformat=STLb&maptype=roadmap&gamma=1&transp=20&hsazi=315&hselev=45&map_lat=39.50760209659334&map_lon=-84.72783341248767&map_zoom=16,14
815,11/3/20,13:53,School Project,Education,School Project,3DP,West Bend,United States,43.4253,-88.1834,"Salt Lake City, UT, USA",place=Salt%20Lake%20City%2C%20UT%2C%20USA&trlat=40.60568172038479&trlon=-111.55789117133398&bllat=40.58009686203303&bllon=-111.60325716054224&DEM_name=USGS/NED&tilewidth=80&printres=0.4&ntilesx=1&ntilesy=1&DEMresolution=19.2&basethick=1&zscale=1.0&fileformat=STLb&maptype=roadmap&gamma=1&transp=60&hsazi=315&hselev=45&map_lat=40.59136220227184&map_lon=-111.58138955747864&map_zoom=14,14
817,11/14/20,04:50,School Project,Education,School Project,3DP,Exeter,United Kingdom,50.7184,-3.5339,,trlat=50.71522324690974&trlon=-4.023372138214141&bllat=50.690001030260284&bllon=-4.0536846763611&DEM_name=JAXA/ALOS/AW3D30/V2_2&tilewidth=80&printres=0.4&ntilesx=1&ntilesy=1&DEMresolution=10.71&basethick=1&zscale=1.0&fileformat=STLb&maptype=roadmap&gamma=1&transp=50&hsazi=315&hselev=45&map_lat=50.69812418315315&map_lon=-4.033533612964377&map_zoom=14,14
818,11/16/20,05:21,school project,Education,School Project,3DP,Pilsen,Czechia,49.7384,13.3736,,trlat=51.0654163794963&trlon=18.878744637298553&bllat=48.53054489528034&bllon=12.075618302154524&DEM_name=JAXA/ALOS/AW3D30/V2_2&tilewidth=80&printres=0.4&ntilesx=1&ntilesy=1&DEMresolution=2448.98&basethick=1&zscale=1.0&fileformat=STLb&maptype=roadmap&gamma=1&transp=20&hsazi=360&hselev=45&map_lat=49.28376290687434&map_lon=15.198733279386255&map_zoom=7,14
819,11/17/20,08:18,school project,Education,School Project,3DP,Elma Center,United States,42.8298,-78.6361,"Grand Canyon National Park, Arizona, USA",place=Grand%20Canyon%20National%20Park%2C%20Arizona%2C%20USA&trlat=36.13969127807151&trlon=-112.0718770912256&bllat=36.06723135106478&bllon=-112.1627619555559&DEM_name=USGS/NED&tilewidth=80&printres=0.4&ntilesx=1&ntilesy=1&DEMresolution=40.92&basethick=1&zscale=1.0&fileformat=STLb&maptype=roadmap&gamma=1&transp=20&hsazi=315&hselev=45&map_lat=36.1075045972846&map_lon=-112.12169688850305&map_zoom=13,14
825,12/7/20,03:22,school project,Education,School Project,3DP,Stavanger Municipality,Norway,59.1185,5.6662,,trlat=59.07409696828432&trlon=5.859988069672015&bllat=58.70637641183677&bllon=5.433581209320453&DEM_name=MERIT/DEM/v1_0_3&tilewidth=80&printres=0.4&ntilesx=1&ntilesy=1&DEMresolution=122.93&basethick=1&zscale=1.5&fileformat=STLb&maptype=roadmap&gamma=1&transp=0&hsazi=315&hselev=45&map_lat=59.02513309078821&map_lon=5.616470358855166&map_zoom=10,14
766,9/21/19,20:31,local interest,Map,Neighborhood,3DP,Blanding,United States,37.6242,-109.4782,,(not set),14
768,11/3/19,04:31,Modell Hungary,Map,Map,3DP,Hodmezovasarhely,Hungary,46.4181,20.33,,(not set),14
770,1/22/20,01:31,FAVORITE RIVER,Map,Map,3DP,Knik-Fairview,United States,61.5159,-149.612,,(not set),14
781,3/23/20,07:26,stydy the land,Map,Map,3DP,Jeddah,Saudi Arabia,21.4858,39.1925,,(not set),14
786,4/26/20,20:20,Lonely Hart XL,Map,Map,3DP,Yorkville,United States,41.6411,-88.4473,,(not set),14
797,7/19/20,01:11,mapa-argentina,Map,Map,3DP,Austin,United States,30.2672,-97.7431,,(not set),14
798,7/22/20,05:56,Terrain reccon,Map,Map,3DP,Nimes,France,43.8367,4.3601,,(not set),14
813,10/28/20,15:03,I live here :D,Map,Property,3DP,(not set),Czechia,0,0,,trlat=49.652011177022196&trlon=13.627461287042268&bllat=49.618485626163896&bllon=13.575353118440251&DEM_name=USGS/NED&tilewidth=80&printres=0.4&ntilesx=1&ntilesy=1&DEMresolution=18.82&basethick=1&zscale=1.0&fileformat=STLb&maptype=roadmap&gamma=1&transp=20&hsazi=315&hselev=45&map_lat=49.62837081749696&map_lon=13.607245697917184&map_zoom=13,14
772,2/2/20,05:51,Personal print,Misc,Personal,3DP,Turin,Italy,45.0703,7.6869,,(not set),14
794,6/20/20,01:56,"kicks, thanks!",Misc,Message,3DP,Sacramento,United States,38.5816,-121.4944,,(not set),14
795,6/26/20,08:43,personal hobby,Misc,Personal,3DP,Dhaka,Bangladesh,23.8103,90.4125,,(not set),14
800,9/21/20,04:51,hobbygeologist,Misc,Personal,3DP,(not set),Germany,0,0,,(not set),14
808,10/25/20,13:45,PLAYING AROUND,Misc,Fun,3DP,Fort Oglethorpe,United States,34.949,-85.2569,,trlat=44.746076744164014&trlon=-107.83344408340454&bllat=44.45273016368441&bllon=-108.40045591659546&DEM_name=USGS/NED&tilewidth=80&printres=0.4&ntilesx=2&ntilesy=2&DEMresolution=112.54&basethick=1&zscale=2&fileformat=STLb&maptype=roadmap&gamma=1&transp=30&hsazi=360&hselev=45&map_lat=34.87650052021582&map_lon=-85.2934955986841&map_zoom=15,14
810,10/27/20,18:26,personal goals,Misc,Personal,3DP,Krasnodar,Russia,45.036,38.9746,,trlat=46.182401082824626&trlon=39.93785688422038&bllat=43.85366268203483&bllon=36.43445404014899&DEM_name=USGS/NED&tilewidth=80&printres=0.2&ntilesx=1&ntilesy=1&DEMresolution=690.36&basethick=1&zscale=1.5&fileformat=STLb&maptype=roadmap&gamma=1&transp=20&hsazi=315&hselev=45&map_lat=44.77221836674541&map_lon=38.296018743434686&map_zoom=8,14
812,10/28/20,04:53,Hobby modelism,Misc,Personal,3DP,Reykjavik,Iceland,64.1466,-21.9426,,trlat=41.228948823133095&trlon=0.5434946891364545&bllat=41.22834364798941&bllon=0.5426721450385807&DEM_name=USGS/NED&tilewidth=80&printres=0.4&ntilesx=1&ntilesy=1&DEMresolution=0.34&basethick=1&zscale=1.0&fileformat=STLb&maptype=roadmap&gamma=1&transp=20&hsazi=315&hselev=45&map_lat=41.228591771351&map_lon=0.5432376441058739&map_zoom=20,14
816,11/6/20,15:38,own use models,Misc,Personal,3DP,Colombo,Sri Lanka,6.9271,79.8612,,trlat=6.861608637690021&trlon=81.0678054690632&bllat=6.8344856755844505&bllon=81.04070219400252&DEM_name=USGS/NED&tilewidth=60&printres=0.4&ntilesx=1&ntilesy=8&DEMresolution=19.97&basethick=2&zscale=2&fileformat=STLb&maptype=hybrid&gamma=1&transp=0&hsazi=360&hselev=45&map_lat=6.853011492931948&map_lon=81.05365301671353&map_zoom=15,14
821,11/25/20,00:25,Just exploring,Misc,Personal,3DP,Toronto,Canada,43.6532,-79.3832,,trlat=44.86338534288617&trlon=-103.32562221464869&bllat=43.25179417652719&bllon=-107.79728239652869&DEM_name=MERIT/DEM/v1_0_3&tilewidth=80&printres=0.4&ntilesx=1&ntilesy=1&DEMresolution=1791.54&basethick=1&zscale=1.0&fileformat=STLb&maptype=roadmap&gamma=1&transp=20&hsazi=315&hselev=45&map_lat=46.27884814143265&map_lon=-98.28342722918883&map_zoom=3,14
823,11/27/20,14:48,personal trial,Misc,Personal,3DP,Dublin,Ireland,53.3498,-6.2603,,trlat=52.03389564569072&trlon=-9.49306801651516&bllat=51.98757097335462&bllon=-9.580500877843273&DEM_name=JAXA/ALOS/AW3D30/V2_2&tilewidth=80&printres=0.4&ntilesx=1&ntilesy=1&DEMresolution=30.02&basethick=1&zscale=2&fileformat=STLb&maptype=roadmap&gamma=1&transp=20&hsazi=315&hselev=45&map_lat=52.00065567727382&map_lon=-9.544238804496691&map_zoom=13,14
769,12/7/19,23:58,radio coverage,Recreation,Radio,3DP,Brisbane,Australia,-27.4698,153.0251,,(not set),14
771,1/23/20,00:38,minecraft map!,Recreation,Gaming,3DP,Agoura Hills,United States,34.1533,-118.7617,,(not set),14
776,2/23/20,07:32,Ham radio club,Recreation,Radio,3DP,Manhattan,United States,39.1836,-96.5717,,(not set),14
784,4/7/20,08:24,map of camp x1,Recreation,Camping,3DP,Phoenix,United States,43.2312,-76.3008,,(not set),14
830,12/13/20,17:30,model railroad,Crafts,Railroad ,3DP,Hillsboro,United States,45.5272,-122.9361,,trlat=44.91408103925933&trlon=-107.62833590928169&bllat=44.6215860911544&bllon=-108.07822034071833&DEM_name=USGS/NED&tilewidth=80&printres=0.4&ntilesx=1&ntilesy=1&DEMresolution=178.07&basethick=1&zscale=1.0&fileformat=STLb&maptype=roadmap&gamma=1&transp=20&hsazi=315&hselev=45&map_lat=44.72240706394906&map_lon=-107.88829704589844&map_zoom=11,14
782,3/24/20,04:57,CFD simulation,Research,Research,3DP,Brussels,Belgium,50.8503,4.3517,,(not set),14
785,4/16/20,14:16,design reseach,Research,Research,3DP,Nuremberg,Germany,49.4521,11.0767,,(not set),14
775,2/11/20,06:31,test printings,Test,Test,3DP,Charlottesville,United States,38.0293,-78.4767,,(not set),14
787,4/26/20,20:22,test CNC carve,Test,Test,CNC,Ashland,United States,42.1946,-122.7095,,(not set),14
796,7/2/20,16:24,plotter fun :),Test,Test,3DP,Palma,Spain,39.5696,2.6502,,(not set),14
827,12/10/20,15:16,3d Print class,Test,Test,3DP,Hamilton,United States,46.2471,-114.1548,"Stevensville, MT 59870, USA",place=Stevensville%2C%20MT%2059870%2C%20USA&trlat=48.99312841450361&trlon=-104.03217455215454&bllat=44.981632497198724&bllon=-116.05106016464235&DEM_name=USGS/NED&tilewidth=80&printres=0.4&ntilesx=1&ntilesy=1&DEMresolution=4571.62&basethick=1&zscale=1.0&fileformat=STLb&maptype=roadmap&gamma=1&transp=20&hsazi=315&hselev=45&map_lat=42.330753051380576&map_lon=-108.79151289722597&map_zoom=5,14
843,12/3/19,22:37,cnc machining,Crafts,hobby,CNC,Auckland,New Zealand,-36.8485,174.7633,,(not set),13
867,3/16/20,13:52,craft project,Crafts,Crafts,3DP,Belpre,United States,39.274,-81.5729,,(not set),13
892,10/9/20,15:07,Home wall art,Crafts,Wall Art,3DP,Hunters Creek,United States,28.3606,-81.4223,,(not set),13
901,11/14/20,11:31,Gift for Wife,Crafts,Gift,3DP,Parchim,Germany,53.425,11.8478,"Wien, ��sterreich",place=Wien%2C%20%C3%96sterreich&trlat=44.746076744164014&trlon=-107.82993575401306&bllat=44.45273016368441&bllon=-108.40396424598694&DEM_name=USGS/NED&tilewidth=80&printres=0.4&ntilesx=1&ntilesy=1&DEMresolution=227.87&basethick=1&zscale=1.0&fileformat=STLb&maptype=roadmap&gamma=1&transp=20&hsazi=315&hselev=45&map_lat=48.21026409355602&map_lon=16.360321573859405&map_zoom=13,13
834,10/18/19,11:35,architectural,Design,Architecture,3DP,Chicago,United States,41.8781,-87.6298,,(not set),13
868,3/27/20,21:00,Desktop Model,Design,3D Design,3DP,Yorkville,United States,41.6411,-88.4473,,(not set),13
879,6/25/20,15:50,makin a maket,Design,Modeling,3DP,Montreal,Canada,45.5017,-73.5673,,(not set),13
880,6/29/20,12:55,Sign for home,Design,Art,3DP,Eau Claire,United States,44.8114,-91.4985,,(not set),13
877,6/13/20,15:46,For education,Education,Education,3DP,Sana'a,Yemen,15.3694,44.191,,(not set),13
878,6/14/20,01:37,For education,Education,Education,3DP,Sana'a,Yemen,15.3694,44.191,,(not set),13
883,7/17/20,08:59,for education,Education,Education,3DP,Istanbul,Turkey,41.0082,28.9784,,(not set),13
884,7/24/20,04:40,for education,Education,Education,3DP,Golbasi,Turkey,39.7983,32.8058,,(not set),13
891,9/24/20,12:14,School THG HN,Education,Education,3DP,Heilbronn,Germany,49.1427,9.2109,,(not set),13
835,10/20/19,09:01,land use eval,Map,Land Use,3DP,Blanding,United States,37.6242,-109.4782,,(not set),13
836,10/28/19,07:00,print my land,Map,Property,3DP,(not set),Portugal,0,0,,(not set),13
837,11/1/19,04:24,to prit model,Map,map,3DP,Kathmandu,Nepal,27.7172,85.324,,(not set),13
840,11/10/19,03:47,terrain model,Map,map,3DP,Ahmedabad,India,23.0225,72.5714,,(not set),13
845,1/7/20,13:09,Print my city,Map,Neighborhood,3DP,Madrid,Spain,40.4168,-3.7038,,(not set),13
863,2/4/20,06:23,for landscape,Map,Landscape,3DP,Lahore,Pakistan,31.5204,74.3587,,(not set),13
870,4/15/20,20:51,Kinzua Bridge,Map,Map,3DP,Yorkville,United States,41.6411,-88.4473,,(not set),13
873,4/26/20,20:35,Lonely Hart 3,Map,Map,3DP,Yorkville,United States,41.6411,-88.4473,,(not set),13
874,4/27/20,18:06,Lonely Hart 4,Map,Map,3DP,Yorkville,United States,41.6411,-88.4473,,(not set),13
875,5/10/20,03:36,������_������� 1.25,Map,Map,3DP,Kallithea,Greece,37.9557,23.6988,,(not set),13
876,5/13/20,01:11,visualization,Map,Map,3DP,West Fargo,United States,46.8769,-96.8999,,(not set),13
885,7/26/20,21:25,Home Hobbyist,Map,Property,3DP,Los Angeles,United States,34.0522,-118.2437,,(not set),13
887,8/27/20,01:22,home planning,Map,Property,3DP,San Diego,United States,32.7157,-117.1611,,(not set),13
889,9/3/20,11:52,Forest Survey,Map,Park,3DP,Ekero,Sweden,59.2798,17.7902,,(not set),13
890,9/15/20,10:39,Love the Fuji,Map,Map,3DP,Cassville,United States,36.677,-93.8688,,(not set),13
896,10/12/20,14:35,site analysis,Map,Property,3DP,Ames,United States,42.0308,-93.6319,,(not set),13
898,10/30/20,10:35,Housebuilding,Map,Property,3DP,Gothenburg,Sweden,57.7089,11.9746,"B̦nsv�_gen 126, Hen̴n, Sverige",place=B%C3%B6nsv%C3%A4gen%20126%2C%20Hen%C3%A5n%2C%20Sverige&trlat=44.743808018306865&trlon=-107.91416069335938&bllat=44.45502460625299&bllon=-108.31973930664063&DEM_name=USGS/NED&tilewidth=80&printres=0.4&ntilesx=1&ntilesy=1&DEMresolution=161&basethick=1&zscale=1.0&fileformat=STLb&maptype=roadmap&gamma=1&transp=20&hsazi=315&hselev=45&map_lat=58.236572358162185&map_lon=11.654973944232392&map_zoom=22,13
899,10/31/20,08:59,Housebuilding,Map,Property,3DP,Gothenburg,Sweden,57.7089,11.9746,"Kebnekaise Sydtopp, Kiruna, Sverige",place=Kebnekaise%20Sydtopp%2C%20Kiruna%2C%20Sverige&trlat=44.733649454017325&trlon=-107.92850514717102&bllat=44.465293350961204&bllon=-108.30539485282898&DEM_name=USGS/NED&tilewidth=80&printres=0.4&ntilesx=1&ntilesy=1&DEMresolution=149.61&basethick=1&zscale=1.0&fileformat=STLb&maptype=roadmap&gamma=1&transp=20&hsazi=315&hselev=45&map_lat=67.9003662&map_lon=18.516200799999986&map_zoom=14,13
902,11/18/20,12:04,Terrain Model,Map,Map,3DP,Murphy,United States,38.4903,-90.4871,"Lake of the Ozarks, Missouri, USA",place=Lake%20of%20the%20Ozarks%2C%20Missouri%2C%20USA&trlat=38.33559979259856&trlon=-92.51515611817373&bllat=37.950563600310865&bllon=-93.04089769532217&DEM_name=USGS/NED&tilewidth=300&printres=0.5&ntilesx=1&ntilesy=1&DEMresolution=76.81&basethick=1&zscale=1.5&fileformat=STLb&maptype=roadmap&gamma=1&transp=60&hsazi=315&hselev=45&map_lat=38.05250961699692&map_lon=-92.82712206055655&map_zoom=11,13
831,10/1/19,17:43,just for fun!,Misc,Fun,3DP,Macedonia,United States,41.3175,-81.5048,,(not set),13
844,12/15/19,09:16,entertainment,Misc,personal,3DP,Blanding,United States,37.6242,-109.4782,,(not set),13
858,1/31/20,16:27,Entertainment,Misc,Personal,3DP,Bend,United States,44.0582,-121.3153,,(not set),13
881,7/14/20,07:02,private model,Misc,Private,3DP,Hamburg,Germany,53.5511,9.9937,,(not set),13
882,7/15/20,23:34,love the snow,Misc,Message,3DP,Wellington,New Zealand,-41.2865,174.7762,,(not set),13
895,10/11/20,17:03,print at home,Misc,Personal,3DP,South Hill,United States,47.1257,-122.293,,(not set),13
897,10/29/20,13:02,Just for fun.,Misc,Fun,3DP,Batesville,United States,35.7698,-91.641,,trlat=35.674864054986465&trlon=-91.96643516990326&bllat=35.44752245262711&bllon=-92.44730875465058&DEM_name=USGS/NED&tilewidth=180&printres=0.4&ntilesx=1&ntilesy=1&DEMresolution=217.98&basethick=1&zscale=2&fileformat=STLb&maptype=roadmap&gamma=1&transp=100&hsazi=315&hselev=45&map_lat=35.562330725566994&map_lon=-92.21614167663239&map_zoom=11,13
900,11/6/20,16:23,personal iuue,Misc,Personal,3DP,Colombo,Sri Lanka,6.9271,79.8612,,trlat=44.74110604719096&trlon=-107.9179765827179&bllat=44.4577566761454&bllon=-108.31592341728211&DEM_name=USGS/NED&tilewidth=80&printres=0.4&ntilesx=1&ntilesy=1&DEMresolution=157.97&basethick=1&zscale=1.0&fileformat=obj&maptype=roadmap&gamma=1&transp=20&hsazi=360&hselev=45&map_lat=6.853011492931948&map_lon=81.05361010136929&map_zoom=15,13
842,11/26/19,16:24,school hiking,Recreation,Hiking,3DP,Melbourne,Australia,-37.8136,144.9631,,(not set),13
846,1/22/20,15:33,favorite hike,Recreation,Hiking,3DP,Knik-Fairview,United States,61.5159,-149.612,,(not set),13
847,1/25/20,00:58,hike planning,Recreation,Hiking,3DP,Sydney,Australia,-33.8688,151.2093,,(not set),13
848,1/25/20,02:57,hike planning,Recreation,Hiking,3DP,Sydney,Australia,-33.8688,151.2093,,(not set),13
849,1/25/20,17:43,hike planning,Recreation,Hiking,3DP,Sydney,Australia,-33.8688,151.2093,,(not set),13
850,1/25/20,20:23,hike planning,Recreation,Hiking,3DP,Sydney,Australia,-33.8688,151.2093,,(not set),13
851,1/28/20,00:05,Camping site!,Recreation,Camping,3DP,Beaverton,United States,45.4889,-122.8014,,(not set),13
853,1/29/20,15:57,hike planning,Recreation,Hiking,3DP,Sydney,Australia,-33.8688,151.2093,,(not set),13
855,1/29/20,21:21,hike planning,Recreation,Hiking,3DP,Sydney,Australia,-33.8688,151.2093,,(not set),13
857,1/31/20,16:05,hike planning,Recreation,Hiking,3DP,Sydney,Australia,-33.8688,151.2093,,(not set),13
859,1/31/20,21:01,hike planning,Recreation,Hiking,3DP,Sydney,Australia,-33.8688,151.2093,,(not set),13
865,2/14/20,13:17,planning trip,Recreation,Tourism,3DP,(not set),United States,0,0,,(not set),13
869,4/7/20,08:16,Model of Camp,Recreation,Camping,3DP,Phoenix,United States,43.2312,-76.3008,,(not set),13
886,8/3/20,15:55,flying safety,Recreation,Aviation,3DP,Mountain View,United States,37.3861,-122.0839,,(not set),13
888,8/31/20,02:46,for a airport,Recreation,Aviation,3DP,Ikast,Denmark,56.1364,9.1546,,(not set),13
832,10/6/19,16:28,research test,Test,Test,3DP,Burton upon Trent,United Kingdom,52.814,-1.6371,,(not set),13
833,10/6/19,18:09,RESEARCH2test,Test,Test,3DP,Burton upon Trent,United Kingdom,52.814,-1.6371,,(not set),13
838,11/5/19,09:48,testing still,Test,Test,3DP,Colorado Springs,United States,38.8339,-104.8214,,(not set),13
841,11/12/19,20:56,experimenting,Test,Test,3DP,Melbourne,Australia,-37.8136,144.9631,,(not set),13
852,1/28/20,20:11,demonstration,Test,Test,3DP,Dublin,United States,40.0992,-83.1141,,(not set),13
864,2/7/20,08:41,To test ideas,Test,Test,3DP,Dallas,United States,32.7767,-96.797,,(not set),13
866,2/27/20,00:56,trying out...,Test,Test,3DP,Kathmandu,Nepal,27.7172,85.324,,(not set),13
871,4/25/20,10:37,to test print,Test,Test,3DP,Brasilia,Brazil,-15.8267,-47.9218,,(not set),13
872,4/26/20,05:38,test kids edu,Test,Test,3DP,Zagreb,Croatia,45.815,15.9819,,(not set),13
915,1/21/20,23:34,CNC hobbyist,Crafts,Carving,CNC,South Hill,United States,47.1257,-122.293,,(not set),12
916,1/22/20,17:08,topo carving,Crafts,Carving,CNC,Lexington,United States,33.9815,-81.2362,,(not set),12
922,2/1/20,13:03,wedding gift,Crafts,Gift,3DP,Cologne,Germany,50.9375,6.9603,,(not set),12
942,4/28/20,00:03,wood carving,Crafts,Carving,CNC,Auckland,New Zealand,-36.8485,174.7633,,(not set),12
943,5/1/20,13:03,Wood CNC art,Crafts,Carving,CNC,Plum,United States,40.5003,-79.7495,,(not set),12
954,6/14/20,10:26,CNC topo map,Crafts,Carving,CNC,Weaverville,United States,35.6971,-82.5607,,(not set),12
955,6/15/20,11:34,for a friend,Crafts,Gift,3DP,Cody,United States,44.5263,-109.0565,,(not set),12
961,6/28/20,07:24,presentation,Crafts,Gift,3DP,Landsberg am Lech,Germany,48.0508,10.8704,,(not set),12
962,6/28/20,16:14,carving wood,Crafts,Carving,CNC,Glendale,United States,33.5387,-112.186,,(not set),12
965,7/11/20,05:57,Wood Carving,Crafts,Carving,CNC,Simpsonville,United States,34.7371,-82.2543,,(not set),12
994,11/22/20,11:40,Tabletop map,Crafts,Furniture,3DP,Steyr,Austria,48.0501,14.4183,,trlat=46.5015383693204&trlon=18.711360489654524&bllat=37.45668435001104&bllon=6.81987622909543&DEM_name=USGS/NED&tilewidth=80&printres=0.4&ntilesx=1&ntilesy=1&DEMresolution=4927.7&basethick=1&zscale=1.0&fileformat=STLb&maptype=roadmap&gamma=1.2&transp=30&hsazi=315&hselev=35&map_lat=41.27422188152088&map_lon=11.544446258684014&map_zoom=6,12
996,11/24/20,10:06,paper weight,Crafts,Crafts,3DP,Los Angeles,United States,34.0522,-118.2437,"Grand Canyon National Park, Arizona, USA",place=Grand%20Canyon%20National%20Park%2C%20Arizona%2C%20USA&trlat=44.746076744164014&trlon=-107.8334422952652&bllat=44.45273016368441&bllon=-108.4004577047348&DEM_name=USGS/NED&tilewidth=120&printres=0.4&ntilesx=1&ntilesy=1&DEMresolution=150.06&basethick=0.5&zscale=5&fileformat=STLb&maptype=terrain&gamma=1&transp=20&hsazi=315&hselev=45&map_lat=36.175594948216805&map_lon=-112.70580489843748&map_zoom=9,12
1000,12/9/20,13:00,Wall hanging,Crafts,Wall Art,3DP,Jupiter,United States,26.9342,-80.0942,,trlat=34.70206145258971&trlon=-82.64714024885946&bllat=34.33438520011878&bllon=-83.22109721525959&DEM_name=USGS/NED&tilewidth=300&printres=0.4&ntilesx=1&ntilesy=1&DEMresolution=87.83&basethick=3&zscale=20&fileformat=STLb&maptype=roadmap&gamma=1&transp=77&hsazi=315&hselev=45&map_lat=34.53642658352844&map_lon=-82.86305092200094&map_zoom=11,12
1001,12/11/20,11:55,CNC Woodwork,Crafts,Carving,CNC,Hayti,United States,36.2337,-89.7495,,trlat=35.1191525008221&trlon=-84.73758956260683&bllat=30.063541391104714&bllon=-88.49582215614319&DEM_name=USGS/NED&tilewidth=80&printres=0.2&ntilesx=1&ntilesy=1&DEMresolution=882.07&basethick=2&zscale=4&fileformat=STLb&maptype=roadmap&gamma=1&transp=50&hsazi=315&hselev=45&map_lat=32.05282828503979&map_lon=-87.32581376330396&map_zoom=7,12
923,2/3/20,18:34,architecture,Design,Architecture,3DP,Syracuse,United States,43.0481,-76.1474,,(not set),12
930,3/27/20,21:44,Desk Model 2,Design,3D Design,3DP,Yorkville,United States,41.6411,-88.4473,,(not set),12
933,3/30/20,10:10,architecutre,Design,Architecture,CNC,Basel,Switzerland,47.5596,7.5886,,(not set),12
936,4/15/20,09:32,Model making,Design,Modeling,3DP,Slough,United Kingdom,51.5105,-0.595,,(not set),12
937,4/15/20,11:51,Model making,Design,Modeling,3DP,Chennai,India,13.0827,80.2707,,(not set),12
949,5/18/20,00:02,architecture,Design,Architecture,3DP,Melbourne,Australia,-37.8136,144.9631,,(not set),12
953,6/13/20,21:14,Architecture,Design,Architecture,3DP,Cancun,Mexico,21.1619,-86.8515,,(not set),12
968,7/16/20,19:01,Architecture,Design,Architecture,3DP,Richmond,Canada,49.1666,-123.1336,,(not set),12
977,8/29/20,16:11,model making,Design,Modeling,3DP,Rawalpindi,Pakistan,33.5651,73.0169,,(not set),12
980,9/10/20,16:56,Architecture,Design,Architecture,3DP,Albuquerque,United States,35.0844,-106.6504,,(not set),12
985,10/22/20,23:07,3-d modeling,Design,3D Design,3DP,Atlanta,United States,33.749,-84.388,,trlat=49.53343894619001&trlon=-64.94083424873351&bllat=23.394520810854026&bllon=-126.7715813762665&DEM_name=USGS/NED&tilewidth=80&printres=0.4&ntilesx=1&ntilesy=1&DEMresolution=27710.24&basethick=1&zscale=1.0&fileformat=STLb&maptype=roadmap&gamma=1&transp=20&hsazi=315&hselev=45&map_lat=39.28054550515186&map_lon=-80.1561372243471&map_zoom=4,12
992,11/16/20,05:26,3d modelleme,Design,3D Design,3DP,Istanbul,Turkey,41.0082,28.9784,,trlat=56.668321219954684&trlon=-111.12717997797247&bllat=56.66069188698403&bllon=-111.14387158818958&DEM_name=USGS/NED&tilewidth=80&printres=0.4&ntilesx=1&ntilesy=1&DEMresolution=5.12&basethick=1&zscale=1.0&fileformat=STLb&maptype=roadmap&gamma=1&transp=20&hsazi=315&hselev=45&map_lat=56.664339062802746&map_lon=-111.13897194703992&map_zoom=16,12
903,9/17/19,18:50,storytelling,Education,Library,3DP,Sacramento,United States,38.5816,-121.4944,,(not set),12
910,11/14/19,16:05,course study,Education,Learning,3DP,Edmonton,Canada,53.5461,-113.4938,,(not set),12
912,11/17/19,03:37,competition!,Education,Exhibition,3DP,Seoul,South Korea,37.5665,126.978,,(not set),12
917,1/22/20,17:14,film project,Education,Exhibition,3DP,San Jacinto,United States,33.7839,-116.9586,,(not set),12
941,4/26/20,12:55,diploma work,Education,Education,3DP,Saint Petersburg,Russia,59.9343,30.3351,,(not set),12
911,11/16/19,19:22,home project,Map,Property,3DP,Madisonville,United States,37.3281,-87.4989,,(not set),12
913,12/20/19,10:40,Welschenrohr,Map,Map,3DP,Oensingen,Switzerland,47.2903,7.7159,,(not set),12
934,3/30/20,12:14,Home Project,Map,Property,3DP,Shoreview,United States,45.0791,-93.1472,,(not set),12
945,5/6/20,08:57,Ohio Pyle 01,Map,Park,3DP,Yorkville,United States,41.6411,-88.4473,,(not set),12
946,5/6/20,21:06,Ohio Pyle 01,Map,Park,3DP,Yorkville,United States,41.6411,-88.4473,,(not set),12
950,5/21/20,10:56,Shapeoko xxl,Map,Map,3DP,Los Lunas,United States,34.8062,-106.7334,,(not set),12
951,5/23/20,14:16,my home city,Map,Property,3DP,Toronto,Canada,43.6532,-79.3832,,(not set),12
966,7/12/20,17:01,aracatubinha,Map,Map,3DP,Curitiba,Brazil,-25.4809,-49.3044,,(not set),12
967,7/13/20,01:17,house siting,Map,Property,3DP,Echuca,Australia,-36.146,144.7448,,(not set),12
970,7/24/20,01:47,mapa 3D tisk,Map,Map,3DP,Zabreh,Czechia,49.8826,16.8722,,(not set),12
979,9/6/20,05:47,teren tulcea,Map,Map,3DP,Tulcea,Romania,45.1716,28.7914,,(not set),12
984,10/22/20,05:01,JARDIN ISERE,Map,Landscape,3DP,(not set),France,0,0,JARDIN ISERE,place=JARDIN%20ISERE&trlat=45.50297208062504&trlon=4.9162749231534475&bllat=45.49435402414197&bllon=4.902787658639491&DEM_name=USGS/NED&tilewidth=80&printres=0.4&ntilesx=1&ntilesy=1&DEMresolution=5.27&basethick=5&zscale=5&fileformat=STLb&maptype=terrain&gamma=1&transp=60&hsazi=315&hselev=45&map_lat=45.49742260991495&map_lon=4.908941204913186&map_zoom=16,12
986,10/24/20,17:25,monte orfano,Map,Map,3DP,Brescia,Italy,45.5416,10.2118,,trlat=45.60003167725437&trlon=9.997307492224747&bllat=45.559365743294535&bllon=9.929100705115346&DEM_name=JAXA/ALOS/AW3D30/V2_2&tilewidth=110&printres=0.2&ntilesx=1&ntilesy=1&DEMresolution=19.36&basethick=1&zscale=1.0&fileformat=STLb&maptype=roadmap&gamma=1&transp=20&hsazi=315&hselev=45&map_lat=45.57532968734353&map_lon=9.958419738831141&map_zoom=14,12
987,10/25/20,16:16,monte orfano,Map,Map,3DP,Brescia,Italy,45.5416,10.2118,,trlat=45.60003167725437&trlon=9.9919859895392&bllat=45.562370466047625&bllon=9.929100705115346&DEM_name=JAXA/ALOS/AW3D30/V2_2&tilewidth=80&printres=0.4&ntilesx=1&ntilesy=1&DEMresolution=24.54&basethick=1&zscale=20&fileformat=STLb&maptype=roadmap&gamma=1&transp=0&hsazi=90&hselev=45&map_lat=45.58191664066219&map_lon=9.941613341711037&map_zoom=14,12
904,9/19/19,05:23,just for fun,Misc,Fun,3DP,Kathmandu,Nepal,27.7172,85.324,,(not set),12
905,9/28/19,13:21,personal use,Misc,Personal,3DP,McKinney,United States,33.1972,-96.6398,,(not set),12
906,9/29/19,11:45,personal use,Misc,Personal,3DP,McKinney,United States,33.1972,-96.6398,,(not set),12
907,10/5/19,10:03,personal use,Misc,Personal,3DP,McKinney,United States,33.1972,-96.6398,,(not set),12
908,10/19/19,12:45,Personal use,Misc,Personal,3DP,Holmes Beach,United States,27.4953,-82.7109,,(not set),12
914,1/19/20,04:10,Personal use,Misc,Personal,3DP,(not set),United Kingdom,0,0,,(not set),12
918,1/22/20,17:46,Personal use,Misc,Personal,3DP,Blairstown,United States,40.9831,-74.9589,,(not set),12
919,1/23/20,16:07,Personal Use,Misc,Personal,3DP,Sesto San Giovanni,Italy,45.5328,9.2257,,(not set),12
920,1/29/20,07:12,Personal use,Misc,Personal,3DP,(not set),United Kingdom,0,0,,(not set),12
921,1/29/20,09:03,Personal use,Misc,Personal,3DP,Randolph,United States,40.8478,-74.5747,,(not set),12
924,2/9/20,15:10,Hobby Cncing,Misc,Personal,CNC,Hamilton,Canada,43.2557,-79.8711,,(not set),12
925,2/13/20,15:21,personal use,Misc,Personal,3DP,Vilnius,Lithuania,54.6872,25.2797,,(not set),12
928,3/17/20,10:51,personal use,Misc,Personal,3DP,De Kwakel,Netherlands,52.2391,4.794,,(not set),12
929,3/21/20,10:05,just curious,Misc,Curious,3DP,(not set),Slovakia,48.8133,17.1616,,(not set),12
938,4/16/20,16:49,personal use,Misc,Personal,3DP,Sandy,United States,40.565,-111.839,,(not set),12
939,4/23/20,20:23,personal use,Misc,Personal,3DP,Independence charter Township,United States,42.7401,-83.383,,(not set),12
940,4/24/20,12:23,for practise,Misc,Fun,3DP,Patras,Greece,38.2466,21.7346,,(not set),12
944,5/4/20,11:28,personal use,Misc,Personal,3DP,Nixa,United States,37.0434,-93.2944,,(not set),12
947,5/9/20,11:32,personal use,Misc,Personal,3DP,Cookeville,United States,36.1628,-85.5016,,(not set),12
952,5/24/20,10:34,Personal Use,Misc,Personal,3DP,Colorado Springs,United States,38.8339,-104.8214,,(not set),12
957,6/16/20,07:52,just for fun,Misc,Fun,3DP,Kathmandu,Nepal,27.7172,85.324,,(not set),12
958,6/18/20,15:29,Just for Fun,Misc,Fun,3DP,Los Angeles,United States,34.0522,-118.2437,,(not set),12
959,6/19/20,01:49,Just curious,Misc,Curious,3DP,Gravesend,United Kingdom,51.4419,0.3708,,(not set),12
960,6/21/20,18:37,fun printing,Misc,Fun,3DP,Calgary,Canada,51.0447,-114.0719,,(not set),12
963,7/1/20,02:06,Personal use,Misc,Personal,3DP,Wilson,United States,35.7213,-77.9155,,(not set),12
969,7/20/20,07:42,PERSONAL USE,Misc,Personal,3DP,(not set),United States,0,0,,(not set),12
971,8/14/20,12:32,personal use,Misc,Personal,3DP,Indianapolis,United States,39.7684,-86.1581,,(not set),12
973,8/18/20,22:06,personal use,Misc,Personal,3DP,Bozeman,United States,45.677,-111.0429,,(not set),12
974,8/20/20,12:44,Personal use,Misc,Personal,3DP,Manhattan,United States,39.1836,-96.5717,,(not set),12
978,8/29/20,19:35,Just for fun,Misc,Fun,3DP,Belo Horizonte,Brazil,-19.9173,-43.9346,,(not set),12
982,10/8/20,15:11,PersonalGame,Misc,Personal,3DP,Houston,United States,29.7604,-95.3698,,(not set),12
988,10/26/20,12:46,personal use,Misc,Personal,3DP,Faisalabad,Pakistan,31.4504,73.135,murree Pakistan,place=murree%20Pakistan&trlat=33.918050021383024&trlon=73.40642685621754&bllat=33.8976771104427&bllon=73.37814998047146&DEM_name=USGS/NED&tilewidth=80&printres=0.4&ntilesx=1&ntilesy=1&DEMresolution=13.08&basethick=5&zscale=1.0&fileformat=STLb&maptype=hybrid&gamma=1&transp=20&hsazi=315&hselev=45&map_lat=33.909405498359476&map_lon=73.38976047056313&map_zoom=15,12
989,10/26/20,13:35,personal use,Misc,Personal,3DP,Faisalabad,Pakistan,31.4504,73.135,K2 Glacier,place=K2%20Glacier&trlat=35.93492563314922&trlon=76.60433876605117&bllat=35.81446756502866&bllon=76.44668781009848&DEM_name=USGS/NED&tilewidth=80&printres=0.5&ntilesx=1&ntilesy=1&DEMresolution=88.98&basethick=2&zscale=2.5&fileformat=STLb&maptype=roadmap&gamma=1&transp=20&hsazi=315&hselev=45&map_lat=35.88823436912604&map_lon=76.49495756297716&map_zoom=12,12
990,10/26/20,20:14,personal use,Misc,Personal,3DP,Faisalabad,Pakistan,31.4504,73.135,k2,place=k2&trlat=35.88290745161073&trlon=76.51624146986666&bllat=35.8792912143312&bllon=76.5109975713809&DEM_name=USGS/NED&tilewidth=80&printres=0.4&ntilesx=1&ntilesy=1&DEMresolution=2.37&basethick=2&zscale=4&fileformat=obj&maptype=roadmap&gamma=1&transp=20&hsazi=315&hselev=45&map_lat=35.882232016908624&map_lon=76.51192436452637&map_zoom=15,12
991,11/7/20,07:39,Personal use,Misc,Personal,3DP,Zion,United States,42.4461,-87.8328,,trlat=50.89619436941741&trlon=-63.76436662237794&bllat=19.304563298272964&bllon=-128.3859035310492&DEM_name=USGS/NED&tilewidth=300&printres=0.4&ntilesx=1&ntilesy=1&DEMresolution=7855.96&basethick=1&zscale=1.0&fileformat=STLb&maptype=roadmap&gamma=1&transp=20&hsazi=315&hselev=45&map_lat=33.296786309439554&map_lon=-93.59796471544419&map_zoom=3,12
993,11/22/20,07:11,personal use,Misc,Personal,3DP,Los Angeles,United States,34.0522,-118.2437,"Lake Arrowhead, CA, USA",place=Lake%20Arrowhead%2C%20CA%2C%20USA&trlat=34.271176357693214&trlon=-117.1538024583663&bllat=34.239110398734965&bllon=-117.22744518907919&DEM_name=USGS/NED&tilewidth=80&printres=0.4&ntilesx=1&ntilesy=1&DEMresolution=33.92&basethick=2&zscale=1.0&fileformat=STLb&maptype=roadmap&gamma=1&transp=20&hsazi=315&hselev=45&map_lat=34.24277628446995&map_lon=-117.22658993929174&map_zoom=13,12
995,11/23/20,12:59,personal use,Misc,Personal,3DP,Syracuse,United States,43.0481,-76.1474,,trlat=39.472028715972215&trlon=-82.0440330154419&bllat=39.46099754385738&bllon=-82.05094238586426&DEM_name=USGS/NED&tilewidth=160&printres=0.3&ntilesx=1&ntilesy=1&DEMresolution=1.19&basethick=3&zscale=1.5&fileformat=STLb&maptype=hybrid&gamma=1&transp=100&hsazi=315&hselev=45&map_lat=39.46715926137908&map_lon=-82.04946536565474&map_zoom=16,12
997,11/28/20,15:54,personal use,Misc,Personal,3DP,Freedom,United States,43.813,-71.035,"Freedom, NH 03836, USA",place=Freedom%2C%20NH%2003836%2C%20USA&trlat=43.88400636237172&trlon=-70.98468569956205&bllat=43.762579310676195&bllon=-71.18663458071134&DEM_name=USGS/NED&tilewidth=100&printres=0.4&ntilesx=1&ntilesy=1&DEMresolution=81.23&basethick=1&zscale=3&fileformat=STLb&maptype=hybrid&gamma=1&transp=15&hsazi=315&hselev=45&map_lat=43.78975752061539&map_lon=-71.19151888332746&map_zoom=11,12
998,12/2/20,16:05,Personal Use,Misc,Personal,3DP,Davis,United States,38.5449,-121.7405,,trlat=36.3807592065069&trlon=-112.07213631253246&bllat=36.10738755364884&bllon=-112.60344257931713&DEM_name=USGS/NED&tilewidth=180&printres=0.4&ntilesx=1&ntilesy=1&DEMresolution=106.13&basethick=1&zscale=2&fileformat=STLb&maptype=roadmap&gamma=1&transp=20&hsazi=315&hselev=45&map_lat=36.26411015710431&map_lon=-112.38310804944042&map_zoom=9,12
999,12/7/20,20:38,Personal Use,Misc,Personal,3DP,Davis,United States,38.5449,-121.7405,,trlat=36.31966260077341&trlon=-111.77245745324461&bllat=35.996525151793705&bllon=-112.26745018624634&DEM_name=USGS/NED&tilewidth=225&printres=0.4&ntilesx=1&ntilesy=1&DEMresolution=79.18&basethick=1&zscale=1.0&fileformat=STLb&maptype=roadmap&gamma=1&transp=20&hsazi=315&hselev=45&map_lat=36.24607764463115&map_lon=-112.18474874162047&map_zoom=10,12
956,6/15/20,13:07,Trailrunning,Recreation,Hiking,3DP,Kronberg,Germany,50.1827,8.5202,,(not set),12
964,7/4/20,16:37,orienteering,Recreation,Hiking,3DP,Balikesir,Turkey,39.6533,27.8903,,(not set),12
909,10/23/19,07:58,Only testing,Test,Test,3DP,Rio de Janeiro,Brazil,-22.9112,-43.4452,,(not set),12
926,2/18/20,09:39,Printemps 3d,Test,Test,3DP,Perpignan,France,42.6887,2.8948,,(not set),12
935,4/1/20,21:45,3D Printing!,Test,Test,3DP,South Hill,United States,47.1257,-122.293,,(not set),12
948,5/11/20,01:26,for 3d print,Test,Test,3DP,Prague,Czechia,50.0755,14.4378,,(not set),12
972,8/15/20,06:49,experimeting,Test,Test,3DP,Srinagar,India,34.0837,74.7973,,(not set),12
975,8/26/20,14:32,3-d printing,Test,Test,3DP,Wilkes-Barre,United States,41.2459,-75.8813,,(not set),12
976,8/28/20,14:03,3-d printing,Test,Test,3DP,Wilkes-Barre,United States,41.2459,-75.8813,,(not set),12
981,10/2/20,11:06,CNC testing!,Test,Test,CNC,Los Angeles,United States,34.0522,-118.2437,,(not set),12
983,10/19/20,02:47,3d Print map,Test,Test,3DP,Rangiora,New Zealand,-43.304,172.5905,,trlat=-43.88386652533893&trlon=171.13716141010318&bllat=-45.5264760961199&bllon=168.79496753836662&DEM_name=USGS/NED&tilewidth=80&printres=0.4&ntilesx=1&ntilesy=1&DEMresolution=928.1&basethick=1&zscale=1.0&fileformat=STLb&maptype=roadmap&gamma=1&transp=20&hsazi=315&hselev=45&map_lat=-43.42449758064509&map_lon=169.09814455235988&map_zoom=7,12
1011,1/7/20,09:54,cnc routing,Crafts,Carving,CNC,Innsbruck,Austria,47.2692,11.4041,,(not set),11
1014,1/21/20,22:54,cnc carving,Crafts,Carving,CNC,Massapequa,United States,40.6807,-73.4743,,(not set),11
1015,1/22/20,08:01,CNC Carving,Crafts,Carving,CNC,Bangor,United States,44.8016,-68.7712,,(not set),11
1016,1/23/20,10:29,CNC project,Crafts,Carving,CNC,LaGrange,United States,33.0362,-85.0322,,(not set),11
1022,2/13/20,08:45,cnc carving,Crafts,Carving,CNC,(not set),United States,0,0,,(not set),11
1023,2/20/20,06:42,Wood Relief,Crafts,Carving,3DP,Bern,Switzerland,46.948,7.4474,,(not set),11
1029,3/17/20,11:09,Wood relief,Crafts,Carving,3DP,(not set),Switzerland,46.3364,6.891,,(not set),11
1030,3/22/20,10:11,cnc carving,Crafts,Carving,CNC,Mesa,United States,33.4152,-111.8315,,(not set),11
1031,3/23/20,21:48,CNC project,Crafts,Carving,CNC,Saint Paul,United States,44.9537,-93.09,,(not set),11
1032,3/25/20,07:20,CNC carving,Crafts,Carving,CNC,Portage,United States,41.5759,-87.1761,,(not set),11
1033,3/31/20,13:46,CNC Machine,Crafts,Carving,CNC,Northglenn,United States,39.8962,-104.9811,,(not set),11
1036,4/11/20,16:11,CNC carving,Crafts,Carving,CNC,Lancaster,United States,34.7204,-80.7709,,(not set),11
1038,4/18/20,16:54,cnc carving,Crafts,Carving,CNC,Vacaville,United States,38.3566,-121.9877,,(not set),11
1048,5/27/20,13:07,wood relief,Crafts,Carving,3DP,Bern,Switzerland,46.948,7.4474,,(not set),11
1049,6/2/20,18:17,cnc machine,Crafts,Carving,CNC,Antioch,United States,38.0049,-121.8058,,(not set),11
1055,6/30/20,17:12,cnc project,Crafts,Carving,CNC,Glendale,United States,33.5387,-112.186,,(not set),11
1063,8/2/20,18:24,CNC carving,Crafts,Carving,CNC,Las Cruces,United States,32.3199,-106.7637,,(not set),11
1069,9/4/20,15:52,CBC carving,Crafts,Carving,CNC,Melbourne,Australia,-37.8136,144.9631,,(not set),11
1075,9/29/20,07:36,CNC project,Crafts,Carving,CNC,(not set),Canada,0,0,,(not set),11
1076,10/3/20,05:44,CNC carving,Crafts,Carving,CNC,Melbourne,Australia,-37.8136,144.9631,,(not set),11
1077,10/5/20,10:27,CNC carving,Crafts,Carving,CNC,Mahone Bay,Canada,44.4492,-64.3821,,(not set),11
1082,10/24/20,14:53,cnc carving,Crafts,Carving,CNC,Kaysville,United States,41.0352,-111.9385,,trlat=41.37066123939503&trlon=-111.92273439929214&bllat=41.33200279965325&bllon=-111.993610878441&DEM_name=USGS/NED&tilewidth=180&printres=0.3&ntilesx=1&ntilesy=1&DEMresolution=9.89&basethick=1&zscale=1.0&fileformat=STLb&maptype=roadmap&gamma=1&transp=10&hsazi=315&hselev=45&map_lat=41.35501092448207&map_lon=-111.96040423676696&map_zoom=14,11
1087,11/3/20,14:51,cnc milling,Crafts,Carving,CNC,(not set),Switzerland,0,0,"Z�_rich, Switzerland",place=Z%C3%BCrich%2C%20Switzerland&trlat=47.46009279628737&trlon=8.849678003786998&bllat=47.442809883669014&bllon=8.824119681118923&DEM_name=USGS/NED&tilewidth=80&printres=0.4&ntilesx=1&ntilesy=1&DEMresolution=9.64&basethick=1&zscale=1.0&fileformat=STLb&maptype=roadmap&gamma=1&transp=26&hsazi=315&hselev=45&map_lat=47.451452937374164&map_lon=8.83689884245296&map_zoom=15,11
1095,11/22/20,00:48,cnc carving,Crafts,Carving,CNC,Ulaanbaatar,Mongolia,47.8864,106.9057,,trlat=49.408250648201154&trlon=92.56011061724543&bllat=49.36545321376398&bllon=92.46170215662833&DEM_name=USGS/NED&tilewidth=80&printres=0.2&ntilesx=1&ntilesy=1&DEMresolution=17.86&basethick=5&zscale=1.0&fileformat=STLb&maptype=hybrid&gamma=1&transp=50&hsazi=315&hselev=45&map_lat=49.354452766308604&map_lon=92.5169367727802&map_zoom=12,11
1101,12/10/20,21:26,cnc carving,Crafts,Carving,CNC,Arnold,United States,38.2555,-120.351,,trlat=39.006517486532566&trlon=-104.71252195434921&bllat=38.685650045489325&bllon=-105.27953378754015&DEM_name=USGS/NED&tilewidth=80&printres=0.4&ntilesx=1&ntilesy=1&DEMresolution=246.12&basethick=1&zscale=1.0&fileformat=STLb&maptype=roadmap&gamma=1&transp=20&hsazi=315&hselev=45&map_lat=38.829375688899745&map_lon=-105.07361881332749&map_zoom=11,11
1102,12/10/20,21:51,cnc cutting,Crafts,Carving,CNC,Arnold,United States,38.2555,-120.351,,trlat=38.84593584099131&trlon=-105.03572335325583&bllat=38.83584108115711&bllon=-105.04863103710517&DEM_name=USGS/NED&tilewidth=80&printres=0.4&ntilesx=1&ntilesy=1&DEMresolution=5.6&basethick=1&zscale=1.0&fileformat=STLb&maptype=roadmap&gamma=1&transp=30&hsazi=315&hselev=45&map_lat=38.83731281310614&map_lon=-105.04790639363631&map_zoom=15,11
1105,12/15/20,02:03,cnc milling,Crafts,Carving,CNC,Linz,Austria,48.3069,14.2858,,trlat=66.61994350101259&trlon=-13.434480705266012&bllat=63.316332234307374&bllon=-24.828447380070713&DEM_name=USGS/GMTED2010&tilewidth=80&printres=0.4&ntilesx=1&ntilesy=1&DEMresolution=2690.78&basethick=3&zscale=3&fileformat=STLb&maptype=roadmap&gamma=1&transp=20&hsazi=315&hselev=45&map_lat=65.6147138467681&map_lon=-19.36397937775137&map_zoom=5,11
1021,2/11/20,06:44,decorations,Design,Decoration,3DP,Rosenheim,Germany,47.8571,12.1181,,(not set),11
1037,4/15/20,20:01,Lonely Hart,Design,Art,3DP,Yorkville,United States,41.6411,-88.4473,,(not set),11
1041,5/5/20,15:01,3d modeling,Design,3D Design,3DP,Bellevue,United States,47.6101,-122.2015,,(not set),11
1050,6/13/20,19:21,3d modeling,Design,3D Design,3DP,Omaha,United States,41.2565,-95.9345,,(not set),11
1085,10/28/20,05:45,design city,Design,3D Design,3DP,Tehran,Iran,35.6892,51.389,,trlat=27.027724047719953&trlon=56.32544521864796&bllat=26.650316257478824&bllon=55.82886889268008&DEM_name=USGS/NED&tilewidth=80&printres=0.4&ntilesx=1&ntilesy=1&DEMresolution=246.79&basethick=1&zscale=1.0&fileformat=GeoTiff&maptype=roadmap&gamma=1&transp=20&hsazi=315&hselev=45&map_lat=26.846102833918145&map_lon=56.122200985674425&map_zoom=11,11
1088,11/5/20,22:24,programming,Design,Programming,3DP,Milwaukee,United States,43.0389,-87.9065,,trlat=44.596514583289284&trlon=-108.18119069404604&bllat=44.5442309856361&bllon=-108.23810359306336&DEM_name=USGS/NED&tilewidth=80&printres=0.4&ntilesx=1&ntilesy=1&DEMresolution=22.6&basethick=1&zscale=1.0&fileformat=STLb&maptype=roadmap&gamma=1&transp=20&hsazi=315&hselev=45&map_lat=44.59982&map_lon=-108.11695&map_zoom=11,11
1004,10/8/19,02:33,school work,Education,Education,3DP,Watermael-Boitsfort,Belgium,50.7882,4.418,,(not set),11
1006,10/18/19,09:37,Educational,Education,Education,3DP,Porto,Portugal,41.1579,-8.6291,,(not set),11
1010,12/4/19,17:28,art project,Education,Art Project,3DP,Camp Hill,United States,40.2398,-76.92,,(not set),11
1026,2/26/20,15:55,art project,Education,Art Project,3DP,London,United Kingdom,51.5074,-0.1278,,(not set),11
1034,4/3/20,05:30,Art Project,Education,Art Project,3DP,Bilbao,Spain,43.263,-2.935,,(not set),11
1044,5/16/20,12:10,educational,Education,Education,3DP,Madrid,Spain,40.4168,-3.7038,,(not set),11
1046,5/20/20,20:26,school work,Education,Education,3DP,Half Moon Bay,United States,37.4636,-122.4286,,(not set),11
1047,5/24/20,19:41,ed printing,Education,Education,3DP,Arlington,United States,38.88,-77.1068,,(not set),11
1051,6/14/20,09:49,Educational,Education,Education,3DP,Vienna,Austria,48.2082,16.3738,,(not set),11
1052,6/24/20,20:22,competition,Education,Exhibition,3DP,Los Angeles,United States,34.0522,-118.2437,,(not set),11
1056,7/2/20,02:03,educational,Education,Education,3DP,Vienna,Austria,48.2082,16.3738,,(not set),11
1058,7/16/20,02:38,study model,Education,Education,3DP,(not set),Oman,0,0,,(not set),11
1059,7/19/20,00:18,study model,Education,Education,3DP,(not set),Oman,0,0,,(not set),11
1065,8/17/20,15:15,educational,Education,Education,3DP,Toccoa,United States,34.5773,-83.3324,,(not set),11
1078,10/8/20,20:07,educational,Education,Education,3DP,Chicago,United States,41.8781,-87.6298,,(not set),11
1081,10/14/20,14:53,educational,Education,Education,3DP,(not set),Spain,0,0,,(not set),11
1083,10/27/20,11:47,for a class,Education,Education,3DP,Oskaloosa,United States,41.2917,-92.6494,,trlat=43.52877853633731&trlon=-89.98269495945522&bllat=40.52313033204707&bllon=-96.68183741550989&DEM_name=USGS/NED&tilewidth=80&printres=0.4&ntilesx=1&ntilesy=1&DEMresolution=2774.02&basethick=3&zscale=1.0&fileformat=STLb&maptype=roadmap&gamma=1&transp=20&hsazi=315&hselev=45&map_lat=42.25344196850673&map_lon=-93.89256892185756&map_zoom=7,11
1086,10/28/20,11:07,Art project,Education,Art Project,3DP,(not set),United Kingdom,0,0,,trlat=52.19076316925449&trlon=1.4853434575427427&bllat=52.18895441734296&bllon=1.4830177029300051&DEM_name=JAXA/ALOS/AW3D30/V2_2&tilewidth=120&printres=0.4&ntilesx=1&ntilesy=1&DEMresolution=0.53&basethick=3&zscale=1.0&fileformat=STLb&maptype=roadmap&gamma=1&transp=100&hsazi=315&hselev=45&map_lat=52.189696936891266&map_lon=1.4841079293332404&map_zoom=18,11
1097,11/24/20,21:51,educational,Education,Education,3DP,Los Angeles,United States,34.0522,-118.2437,,trlat=37.82597248065992&trlon=-119.44069884991858&bllat=37.65493087533799&bllon=-119.76767373545681&DEM_name=USGS/NED&tilewidth=180&printres=0.4&ntilesx=1&ntilesy=1&DEMresolution=64.04&basethick=2&zscale=1.0&fileformat=STLb&maptype=roadmap&gamma=1&transp=20&hsazi=315&hselev=45&map_lat=37.67254798966329&map_lon=-119.67388081173065&map_zoom=11,11
1060,7/20/20,06:13,map viewing,Map,Map,3DP,Lisbon,Portugal,38.7223,-9.1393,,(not set),11
1070,9/15/20,10:46,lovemt fuji,Map,Map,3DP,Cassville,United States,36.677,-93.8688,,(not set),11
1073,9/21/20,14:53,waterbranch,Map,Map,3DP,Austin,United States,30.2672,-97.7431,,(not set),11
1096,11/24/20,20:01,CAPRI ITALY,Map,Map,3DP,Tijuana,Mexico,32.5149,-117.0382,"Capri, Metropolitan City of Naples, Italy",place=Capri%2C%20Metropolitan%20City%20of%20Naples%2C%20Italy&trlat=40.56684368126291&trlon=14.268692528533906&bllat=40.532018501330874&bllon=14.191688095855696&DEM_name=USGS/NED&tilewidth=80&printres=0.4&ntilesx=1&ntilesy=1&DEMresolution=32.61&basethick=1&zscale=1.0&fileformat=STLb&maptype=roadmap&gamma=1&transp=0&hsazi=315&hselev=45&map_lat=40.549094002269825&map_lon=14.220353260865112&map_zoom=14,11
1099,12/7/20,12:44,Vail Resort,Map,Map,3DP,Centennial,United States,39.5807,-104.8772,,trlat=39.66076633604744&trlon=-106.23939653701783&bllat=39.53722816225125&bllon=-106.43321653671266&DEM_name=USGS/NED&tilewidth=80&printres=0.4&ntilesx=1&ntilesy=1&DEMresolution=83.24&basethick=1&zscale=1.0&fileformat=STLb&maptype=roadmap&gamma=1&transp=20&hsazi=315&hselev=45&map_lat=39.601393417470234&map_lon=-106.37948230561653&map_zoom=12,11
1002,9/29/19,19:57,Hobby print,Misc,Personal,3DP,Hamilton,Canada,43.2557,-79.8711,,(not set),11
1024,2/20/20,12:02,interesting,Misc,Personal,3DP,Kyiv,Ukraine,50.4501,30.5234,,(not set),11
1028,2/29/20,07:51,fun fun fun,Misc,Fun,3DP,Frankfort,United States,44.6336,-86.2345,,(not set),11
1039,4/22/20,14:15,Private use,Misc,Private,3DP,Appleton,United States,44.2619,-88.4154,,(not set),11
1043,5/10/20,20:11,only to see,Misc,Curious,3DP,Lisbon,Portugal,38.7223,-9.1393,,(not set),11
1079,10/10/20,22:21,for nothing,Misc,Personal,3DP,East London,South Africa,-33.0292,27.8546,,(not set),11
1035,4/7/20,08:29,Camp map x2,Recreation,Camping,3DP,Phoenix,United States,43.2312,-76.3008,,(not set),11
1094,11/20/20,23:53,Meteorology,Research,Meteorology,3DP,Adjud,Romania,46.0962,27.1822,,trlat=48.56450779159712&trlon=28.153285010534155&bllat=44.821121902936845&bllon=24.760621859508383&DEM_name=JAXA/ALOS/AW3D30/V2_2&tilewidth=80&printres=0.4&ntilesx=1&ntilesy=1&DEMresolution=1297.54&basethick=1&zscale=1.0&fileformat=STLb&maptype=roadmap&gamma=1&transp=20&hsazi=315&hselev=45&map_lat=46.51465008827146&map_lon=26.925975277553448&map_zoom=6,11
1003,10/6/19,23:20,3d printing,Test,Test,3DP,Austin,United States,30.2672,-97.7431,,(not set),11
1005,10/17/19,13:07,3d printing,Test,Test,3DP,Ljubljana,Slovenia,46.0569,14.5058,,(not set),11
1007,10/23/19,15:30,3d printing,Test,Test,3DP,Chihuahua,Mexico,28.633,-106.0691,,(not set),11
1008,11/10/19,11:56,3d printing,Test,Test,3DP,Jazan,Saudi Arabia,16.8894,42.5706,,(not set),11
1009,11/15/19,22:46,3d printing,Test,Test,3DP,Abbotsford,Canada,49.0504,-122.3045,,(not set),11
1012,1/17/20,16:37,Printing!!!,Test,Test,3DP,Santa Cruz,United States,36.9741,-122.0308,,(not set),11
1013,1/21/20,13:28,3D printing,Test,Test,3DP,Boise,United States,43.615,-116.2023,,(not set),11
1017,1/28/20,12:31,3d printing,Test,Test,3DP,Cookeville,United States,36.1628,-85.5016,,(not set),11
1018,1/29/20,10:32,3d printing,Test,Test,3DP,Lawrence,United States,39.8387,-86.0253,,(not set),11
1020,1/30/20,22:01,3d printing,Test,Test,3DP,Plainview,United States,34.1848,-101.7068,,(not set),11
1025,2/26/20,15:03,3d printing,Test,Test,3DP,Anaheim,United States,33.8366,-117.9143,,(not set),11
1027,2/28/20,13:10,3d printing,Test,Test,3DP,Spisska Nova Ves,Slovakia,48.9453,20.5637,,(not set),11
1040,4/26/20,14:44,3D printing,Test,Test,3DP,Enschede,Netherlands,52.2215,6.8937,,(not set),11
1042,5/7/20,10:18,3d printing,Test,Test,3DP,Zwolle,Netherlands,52.5168,6.083,,(not set),11
1045,5/16/20,18:17,3d printing,Test,Test,3DP,Sofia,Bulgaria,42.6977,23.3219,,(not set),11
1053,6/26/20,13:29,3d printing,Test,Test,3DP,Indianapolis,United States,39.7684,-86.1581,,(not set),11
1054,6/27/20,17:33,3d printing,Test,Test,3DP,Port Coquitlam,Canada,49.2628,-122.7811,,(not set),11
1057,7/14/20,19:46,3d Printing,Test,Test,3DP,(not set),United States,0,0,,(not set),11
1062,7/25/20,04:56,3d printi g,Test,Test,3DP,Zwolle,Netherlands,52.5168,6.083,,(not set),11
1064,8/9/20,20:38,3D printing,Test,Test,3DP,Commerce Charter Township,United States,42.5751,-83.4882,,(not set),11
1066,8/28/20,18:31,3d printing,Test,Test,3DP,Tucson,United States,32.2226,-110.9747,,(not set),11
1067,9/1/20,18:15,3D printing,Test,Test,3DP,David,Panama,8.4007,-82.4428,,(not set),11
1071,9/21/20,14:09,3d-printing,Test,Test,3DP,Placerville,United States,38.7296,-120.7985,,(not set),11
1072,9/21/20,14:12,3d printing,Test,Test,3DP,Placerville,United States,38.7296,-120.7985,,(not set),11
1074,9/24/20,13:27,3D printing,Test,Test,3DP,Pikeville,United States,37.4793,-82.5188,,(not set),11
1080,10/11/20,15:32,to print 3d,Test,Test,3DP,Getafe,Spain,40.3083,-3.7324,,(not set),11
1084,10/27/20,19:22,3d Printing,Test,Test,3DP,Biddeford,United States,43.4926,-70.4534,,trlat=43.702941514171016&trlon=-70.17449665486585&bllat=43.61141047642054&bllon=-70.30482054592815&DEM_name=USGS/NED&tilewidth=80&printres=0.4&ntilesx=1&ntilesy=1&DEMresolution=52.56&basethick=1&zscale=1.0&fileformat=obj&maptype=roadmap&gamma=1&transp=40&hsazi=315&hselev=45&map_lat=43.66881891211837&map_lon=-70.23141885430324&map_zoom=13,11
1089,11/7/20,22:39,3d printing,Test,Test,3DP,Wellington,New Zealand,-41.2769,174.7731,,trlat=-33.91321774450688&trlon=178.91338387660986&bllat=-47.42043822714773&bllon=166.21013799839022&DEM_name=JAXA/ALOS/AW3D30/V2_2&tilewidth=80&printres=0.4&ntilesx=1&ntilesy=1&DEMresolution=5370.77&basethick=1&zscale=3&fileformat=STLb&maptype=roadmap&gamma=1&transp=20&hsazi=315&hselev=45&map_lat=-34.733642181506944&map_lon=179.8652030465275&map_zoom=4,11
1090,11/8/20,02:09,3d printing,Test,Test,3DP,Dammam,Saudi Arabia,26.4207,50.0888,,trlat=25.720202991870444&trlon=37.24779316667551&bllat=25.714784055513746&bllon=37.230620449186205&DEM_name=USGS/NED&tilewidth=80&printres=0.4&ntilesx=1&ntilesy=1&DEMresolution=8.62&basethick=1&zscale=1.0&fileformat=STLb&maptype=roadmap&gamma=1&transp=20&hsazi=315&hselev=45&map_lat=25.711423628439036&map_lon=37.23783351691523&map_zoom=15,11
1091,11/8/20,13:31,3D printing,Test,Test,3DP,Norman,United States,35.2226,-97.4395,"Wichita Mountains, Oklahoma 73507, USA",place=Wichita%20Mountains%2C%20Oklahoma%2073507%2C%20USA&trlat=44.746076744164014&trlon=-107.89554616279602&bllat=44.45273016368441&bllon=-108.33835383720398&DEM_name=USGS/NED&tilewidth=80&printres=0.4&ntilesx=1&ntilesy=1&DEMresolution=175.78&basethick=1&zscale=1.0&fileformat=STLb&maptype=roadmap&gamma=1&transp=20&hsazi=315&hselev=45&map_lat=34.76515176820895&map_lon=-98.63315414377213&map_zoom=12,11
1092,11/10/20,08:52,3d printing,Test,Test,3DP,Morehead,United States,38.184,-83.4327,"Great Smoky Mountains, United States",place=Great%20Smoky%20Mountains%2C%20United%20States&trlat=35.72953173543345&trlon=-83.18094071895142&bllat=35.38482057471513&bllon=-83.88482389003293&DEM_name=USGS/NED&tilewidth=80&printres=0.4&ntilesx=1&ntilesy=1&DEMresolution=319.09&basethick=1&zscale=1.0&fileformat=obj&maptype=roadmap&gamma=1&transp=30&hsazi=315&hselev=45&map_lat=35.534154659567825&map_lon=-83.49923667460936&map_zoom=10,11
1093,11/11/20,12:51,3d printing,Test,Test,3DP,Edinburgh,United Kingdom,55.9533,-3.1883,,trlat=55.43179842109806&trlon=-2.76399888222411&bllat=55.41718595728144&bllon=-2.799437121798529&DEM_name=USGS/NED&tilewidth=80&printres=0.4&ntilesx=1&ntilesy=1&DEMresolution=11.22&basethick=1&zscale=1.0&fileformat=STLb&maptype=roadmap&gamma=1&transp=20&hsazi=315&hselev=45&map_lat=55.42400662478468&map_lon=-2.786481605221769&map_zoom=15,11
1098,11/28/20,07:00,3D printing,Test,Test,3DP,Utrecht,Netherlands,52.0907,5.1214,,trlat=52.11469040766911&trlon=5.06404338526802&bllat=52.09780939396684&bllon=5.030636471987533&DEM_name=JAXA/ALOS/AW3D30/V2_2&tilewidth=100&printres=0.5&ntilesx=1&ntilesy=1&DEMresolution=11.44&basethick=2&zscale=3&fileformat=STLb&maptype=roadmap&gamma=0.3&transp=60&hsazi=315&hselev=55&map_lat=52.10827104939829&map_lon=5.050328433509179&map_zoom=14,11
1100,12/8/20,12:43,3D printing,Test,Test,3DP,Barrie,Canada,44.3894,-79.6903,,trlat=45.296987209827094&trlon=-111.42437746591568&bllat=45.2605850282028&bllon=-111.46649977035524&DEM_name=USGS/NED&tilewidth=100&printres=0.4&ntilesx=1&ntilesy=1&DEMresolution=13.22&basethick=5&zscale=1.25&fileformat=obj&maptype=hybrid&gamma=1&transp=100&hsazi=315&hselev=45&map_lat=45.26081144174918&map_lon=-111.4437295023416&map_zoom=15,11
1104,12/14/20,20:48,3d printing,Test,Test,3DP,Allendale Charter Township,United States,42.9722,-85.954,"Mount Rainier, Washington 98304, USA",place=Mount%20Rainier%2C%20Washington%2098304%2C%20USA&trlat=46.88532463432511&trlon=-121.7113181153272&bllat=46.81728629299389&bllon=-121.81080482396827&DEM_name=USGS/NED&tilewidth=80&printres=0.4&ntilesx=1&ntilesy=1&DEMresolution=37.94&basethick=1&zscale=1.0&fileformat=STLb&maptype=roadmap&gamma=1&transp=0&hsazi=315&hselev=45&map_lat=46.839734991071204&map_lon=-121.77191848048744&map_zoom=13,11
1117,1/11/20,09:04,for a gift,Crafts,Gift,3DP,Secaucus,United States,40.7895,-74.0565,,(not set),10
1128,2/9/20,11:17,3d Carving,Crafts,Carving,CNC,Mapleton,United States,40.1302,-111.5785,,(not set),10
1130,2/16/20,01:29,CNC Router,Crafts,Carving,CNC,Saint Paul,United States,44.9537,-93.09,,(not set),10
1132,3/15/20,11:42,Vcarve CMC,Crafts,Carving,CNC,Gilford,United States,43.5476,-71.4067,,(not set),10
1133,3/15/20,12:00,cnc router,Crafts,Carving,CNC,Hayden,United States,47.766,-116.7866,,(not set),10
1135,3/28/20,13:51,Wall panel,Crafts,Wall Art,3DP,(not set),Russia,0,0,,(not set),10
1147,4/25/20,08:44,wood carve,Crafts,Carving,CNC,Tripoli,United States,42.808,-92.2582,,(not set),10
1149,4/30/20,02:48,cnc router,Crafts,Carving,CNC,Hobart,Australia,-42.8821,147.3272,,(not set),10
1153,5/18/20,20:13,3d carving,Crafts,Carving,CNC,Cumming,United States,34.2073,-84.1402,,(not set),10
1154,5/21/20,15:48,CNC Router,Crafts,Carving,CNC,Newton,United States,35.6699,-81.2215,,(not set),10
1156,6/8/20,12:22,3d carving,Crafts,Carving,CNC,Las Vegas,United States,36.1699,-115.1398,,(not set),10
1157,6/8/20,12:30,3d Carving,Crafts,Carving,CNC,Las Vegas,United States,36.1699,-115.1398,,(not set),10
1162,6/30/20,09:24,3D carving,Crafts,Carving,CNC,Bristol,United States,36.5951,-82.1887,,(not set),10
1166,8/20/20,21:02,CNC models,Crafts,Carving,CNC,Lexington,United States,38.0406,-84.5037,,(not set),10
1170,9/21/20,11:40,3d carving,Crafts,Carving,CNC,Sheridan,United States,44.7972,-106.9562,,(not set),10
1173,10/10/20,09:40,CNC router,Crafts,Carving,CNC,Tuckahoe,United States,37.5901,-77.5564,,(not set),10
1175,10/16/20,12:17,3D Carving,Crafts,Carving,CNC,West Milford,United States,41.1311,-74.3673,,trlat=43.87848880962866&trlon=-73.39567768948613&bllat=43.38050315260416&bllon=-73.74534045907195&DEM_name=USGS/NED&tilewidth=80&printres=0.4&ntilesx=1&ntilesy=1&DEMresolution=141.1&basethick=1&zscale=1.0&fileformat=STLb&maptype=roadmap&gamma=1&transp=20&hsazi=315&hselev=45&map_lat=43.51004162985611&map_lon=-73.60209476763842&map_zoom=10,10
1177,10/30/20,22:51,cn machine,Crafts,Carving,CNC,Southaven,United States,34.9919,-90.0023,North America,place=North%20America&trlat=74.36691479666464&trlon=-45.82775950431824&bllat=11.02613044948141&bllon=-170.65661549568176&DEM_name=USGS/NED&tilewidth=80&printres=0.4&ntilesx=1&ntilesy=1&DEMresolution=51143.06&basethick=1&zscale=1.0&fileformat=STLb&maptype=roadmap&gamma=1&transp=100&hsazi=315&hselev=45&map_lat=61.10665043700478&map_lon=-105.60546875&map_zoom=3,10
1181,11/24/20,19:49,router cnc,Crafts,Carving,CNC,Tijuana,Mexico,32.5149,-117.0382,,trlat=32.49566302599812&trlon=-116.8779387123108&bllat=32.46148874153217&bllon=-116.91177030868532&DEM_name=USGS/NED&tilewidth=80&printres=0.4&ntilesx=1&ntilesy=1&DEMresolution=15.9&basethick=1&zscale=1.0&fileformat=STLb&maptype=roadmap&gamma=1&transp=0&hsazi=315&hselev=45&map_lat=32.48627074460808&map_lon=-116.91307559936035&map_zoom=14,10
1182,11/24/20,20:17,cnc carlos,Crafts,Carving,CNC,Tijuana,Mexico,32.5149,-117.0382,"8865 Lake Murray Blvd, San Diego, CA 92119, USA",place=8865%20Lake%20Murray%20Blvd%2C%20San%20Diego%2C%20CA%2092119%2C%20USA&trlat=32.855742920165156&trlon=-117.0104612953186&bllat=32.80280350971601&bllon=-117.08497663803102&DEM_name=USGS/NED&tilewidth=100&printres=0.4&ntilesx=1&ntilesy=1&DEMresolution=27.91&basethick=1&zscale=1.0&fileformat=STLb&maptype=roadmap&gamma=1&transp=10&hsazi=315&hselev=45&map_lat=32.82571382289755&map_lon=-117.05176002389109&map_zoom=14,10
1183,11/25/20,09:46,3D carving,Crafts,Carving,CNC,Alexandria,United States,31.3113,-92.4451,"Scotland, UK",place=Scotland%2C%20UK&trlat=58.701778928538175&trlon=-0.721906121923821&bllat=54.5917482718943&bllon=-7.773869928076178&DEM_name=USGS/NED&tilewidth=80&printres=0.4&ntilesx=1&ntilesy=1&DEMresolution=2163.08&basethick=1&zscale=1.0&fileformat=obj&maptype=roadmap&gamma=1&transp=20&hsazi=315&hselev=45&map_lat=57.46058026613049&map_lon=-4.654631475311675&map_zoom=7,10
1185,12/11/20,20:11,cut on cnc,Crafts,Carving,CNC,Warren,United States,42.5145,-83.0146,,trlat=39.53222908937987&trlon=-80.5938126689911&bllat=39.51468558853804&bllon=-80.61802407569886&DEM_name=USGS/NED&tilewidth=80&printres=0.25&ntilesx=1&ntilesy=1&DEMresolution=6.51&basethick=3&zscale=1.0&fileformat=STLb&maptype=roadmap&gamma=1&transp=60&hsazi=315&hselev=45&map_lat=39.521000418159275&map_lon=-80.60950323107923&map_zoom=15,10
1108,10/7/19,12:37,hobbie art,Design,Art,3DP,Seattle,United States,47.6062,-122.3321,,(not set),10
1129,2/12/20,23:34,decoration,Design,Decoration,3DP,Salt Lake City,United States,40.7608,-111.891,,(not set),10
1134,3/27/20,20:24,Desk Decor,Design,Decoration,3DP,Yorkville,United States,41.6411,-88.4473,,(not set),10
1139,4/11/20,12:05,decoration,Design,Decoration,3DP,Waterford Township,United States,42.6907,-83.4066,,(not set),10
1140,4/11/20,12:10,Decoration,Design,Decoration,3DP,Waterford Township,United States,42.6907,-83.4066,,(not set),10
1145,4/22/20,14:58,Usinage 3D,Design,3D Design,3DP,Strasbourg,France,48.5734,7.7521,,(not set),10
1146,4/22/20,15:09,usinage 3D,Design,3D Design,3DP,Strasbourg,France,48.5734,7.7521,,(not set),10
1151,5/4/20,18:14,3 modeling,Design,3D Design,3DP,Bellevue,United States,47.6101,-122.2015,,(not set),10
1171,9/23/20,16:18,Decoration,Design,Decoration,3DP,Calgary,Canada,51.0447,-114.0719,,(not set),10
1122,1/24/20,23:51,For school,Education,Education,3DP,Sitka,United States,57.0531,-135.33,,(not set),10
1126,1/30/20,12:51,school map,Education,Education,3DP,Fairfax,United States,37.9871,-122.5889,,(not set),10
1127,2/3/20,07:45,university,Education,College,3DP,London,United Kingdom,51.5074,-0.1278,,(not set),10
1150,5/1/20,02:15,University,Education,College,3DP,Melbourne,Australia,-37.8136,144.9631,,(not set),10
1158,6/14/20,05:13,university,Education,College,3DP,Granada,Spain,37.1773,-3.5986,,(not set),10
1164,7/8/20,22:42,educathion,Education,College,3DP,Setagaya City,Japan,35.6466,139.6533,,(not set),10
1168,9/17/20,02:15,University,Education,College,3DP,Christchurch,New Zealand,-43.532,172.6396,,(not set),10
1169,9/20/20,16:08,university,Education,College,3DP,(not set),Peru,0,0,,(not set),10
1178,11/5/20,15:44,university,Education,College,3DP,London,United Kingdom,51.5074,-0.1278,,trlat=50.916423069635485&trlon=0.9834712394554623&bllat=50.91236447436393&bllon=0.9756750636775502&DEM_name=JAXA/ALOS/AW3D30/V2_2&tilewidth=80&printres=0.4&ntilesx=1&ntilesy=1&DEMresolution=2.74&basethick=1&zscale=1.0&fileformat=STLb&maptype=roadmap&gamma=1&transp=39&hsazi=360&hselev=45&map_lat=50.91498912837919&map_lon=0.9761291113723525&map_zoom=16,10
1179,11/13/20,07:36,University,Education,College,3DP,Stuttgart,Germany,48.7758,9.1829,,trlat=48.81141376130748&trlon=9.239390717769874&bllat=48.79386032793792&bllon=9.203728066707862&DEM_name=USGS/SRTMGL1_003&tilewidth=80&printres=0.5&ntilesx=1&ntilesy=1&DEMresolution=16.37&basethick=2&zscale=1.0&fileformat=STLb&maptype=roadmap&gamma=1&transp=40&hsazi=315&hselev=45&map_lat=48.802410951987795&map_lon=9.221559392238868&map_zoom=14,10
1118,1/12/20,13:04,home decor,Map,Property,3DP,London,United Kingdom,51.5074,-0.1278,,(not set),10
1119,1/22/20,01:37,JOANS FARM,Map,Farm,3DP,Knik-Fairview,United States,61.5159,-149.612,,(not set),10
1121,1/24/20,11:04,site model,Map,Property,3DP,Williamsport,United States,41.2412,-77.0011,,(not set),10
1136,3/30/20,03:22,KLINE FARM,Map,Farm,3DP,Broken Arrow,United States,36.061,-95.7975,,(not set),10
1142,4/15/20,19:40,Home Hobby,Map,Property,3DP,Yorkville,United States,41.6411,-88.4473,,(not set),10
1143,4/16/20,18:16,rock creek,Map,Map,3DP,Medford,United States,42.3265,-122.8756,,(not set),10
1155,5/29/20,15:04,land trust,Map,Property,3DP,Pasadena,United States,34.1478,-118.1445,,(not set),10
1163,7/2/20,14:05,GUALLATIRI,Map,Map,3DP,Santiago,Chile,-33.4489,-70.6693,,(not set),10
1167,8/22/20,09:59,schramberg,Map,Map,3DP,(not set),Germany,0,0,,(not set),10
1172,9/25/20,13:42,Directions,Map,Map,3DP,Idaho Falls,United States,43.4927,-112.0408,,(not set),10
1176,10/22/20,06:19,litomerice,Map,Map,3DP,Litomerice,Czechia,50.5384,14.1305,,trlat=50.58221369562708&trlon=14.193075691986094&bllat=50.50214085933759&bllon=14.044917618560815&DEM_name=USGS/NED&tilewidth=80&printres=0.4&ntilesx=1&ntilesy=1&DEMresolution=52.51&basethick=1&zscale=1.0&fileformat=STLb&maptype=roadmap&gamma=1&transp=20&hsazi=315&hselev=45&map_lat=50.53747090405845&map_lon=14.077914498585992&map_zoom=12,10
1115,1/2/20,20:23,For fun :P,Misc,Fun,3DP,Draper,United States,40.5247,-111.8638,,(not set),10
1120,1/22/20,07:13,commercial,Misc,Commercial,3DP,Caen,France,49.1829,-0.3707,,(not set),10
1131,2/29/20,12:23,My project,Misc,Personal,3DP,Dushanbe,Tajikistan,38.5598,68.787,,(not set),10
1144,4/16/20,21:06,curiousity,Misc,Curious,3DP,(not set),Canada,0,0,,(not set),10
1180,11/19/20,15:41,my project,Misc,Personal,3DP,Sarajevo,Bosnia & Herzegovina,43.8563,18.4131,"Patriotske lige, Sarajevo 71000, _�__��___� _� _�_��ۄ�_�_______�___�",place=Patriotske%20lige%2C%20Sarajevo%2071000%2C%20%D0%91%D0%BE%D1%81%D0%BD%D0%B0%20%D0%B8%20%D0%A5%D0%B5%D1%80%D1%86%D0%B5%D0%B3%D0%BE%D0%B2%D0%B8%D0%BD%D0%B0&trlat=44.746076744164014&trlon=-107.89200778428167&bllat=44.45273016368441&bllon=-108.34189221571833&DEM_name=USGS/NED&tilewidth=80&printres=0.4&ntilesx=1&ntilesy=1&DEMresolution=178.59&basethick=1&zscale=1.0&fileformat=STLb&maptype=roadmap&gamma=1&transp=30&hsazi=315&hselev=45&map_lat=43.876538348638526&map_lon=18.41239901794724&map_zoom=19,10
1116,1/5/20,15:11,fun skiing,Recreation,Ski,3DP,West Jordan,United States,40.6097,-111.9391,,(not set),10
1138,4/7/20,13:13,Scout Camp,Recreation,Camping,3DP,Phoenix,United States,43.2312,-76.3008,,(not set),10
1141,4/15/20,13:42,roblox : D,Recreation,Gaming,3DP,Liverpool,United Kingdom,53.4084,-2.9916,,(not set),10
1159,6/18/20,20:04,Dirtbiking,Recreation,Dirt Biking,3DP,Denver,United States,39.7392,-104.9902,,(not set),10
1160,6/18/20,20:29,dirtbiking,Recreation,Dirt Biking,3DP,Denver,United States,39.7392,-104.9902,,(not set),10
1161,6/25/20,10:07,Huntingmap,Recreation,Hunting,3DP,Osnabruck,Germany,52.2799,8.0472,,(not set),10
1106,9/29/19,10:34,first test,Test,Test,3DP,Krnov,Czechia,50.0906,17.7031,,(not set),10
1107,10/2/19,11:44,experiment,Test,Test,3DP,Milan,Italy,45.4642,9.19,,(not set),10
1109,10/24/19,12:00,Test print,Test,Test,3DP,New Orleans,United States,29.9511,-90.0715,,(not set),10
1110,11/15/19,23:05,print test,Test,Test,3DP,Abbotsford,Canada,49.0504,-122.3045,,(not set),10
1111,11/28/19,08:05,Test Print,Test,Test,3DP,(not set),Australia,0,0,,(not set),10
1112,11/28/19,08:13,Test print,Test,Test,3DP,(not set),Australia,0,0,,(not set),10
1113,11/29/19,01:33,Test Print,Test,Test,3DP,(not set),Australia,0,0,,(not set),10
1114,11/29/19,01:48,Test print,Test,Test,3DP,(not set),Australia,0,0,,(not set),10
1123,1/25/20,13:25,3d printer,Test,Test,3DP,Chicago,United States,41.8781,-87.6298,,(not set),10
1124,1/25/20,16:03,3d printer,Test,Test,3DP,Chicago,United States,41.8781,-87.6298,,(not set),10
1125,1/29/20,01:22,experiment,Test,Test,3DP,Hyderabad,India,17.385,78.4867,,(not set),10
1148,4/29/20,17:22,3d printin,Test,Test,3DP,Bristol,United Kingdom,51.4545,-2.5879,,(not set),10
1152,5/13/20,07:19,3Dprinting,Test,Test,3DP,Willebroek,Belgium,51.0598,4.364,,(not set),10
1165,8/3/20,18:42,Test Print,Test,Test,3DP,Hanford,United States,36.3274,-119.6457,,(not set),10
1174,10/13/20,14:00,3D printer,Test,Test,3DP,Grand Junction,United States,39.0639,-108.5506,,(not set),10
1195,11/2/19,13:57,cnc model,Crafts,Carving,CNC,Janesville,United States,42.6828,-89.0187,,(not set),9
1201,12/15/19,15:52,xmas gife,Crafts,Gift,3DP,New York,United States,40.7128,-74.006,,(not set),9
1226,4/18/20,16:58,cnc carve,Crafts,Carving,CNC,Vacaville,United States,38.3566,-121.9877,,(not set),9
1255,8/8/20,21:27,A puzzle!,Crafts,Puzzle,3DP,(not set),United States,0,0,,(not set),9
1256,8/15/20,19:31,CNC carve,Crafts,Carving,CNC,Hobart,Australia,-42.8821,147.3272,,(not set),9
1270,10/2/20,12:37,Furniture,Crafts,Crafts,3DP,Dudley,United States,42.0434,-71.9276,,(not set),9
1274,10/26/20,17:39,CNC model,Crafts,Carving,CNC,Kennebunk,United States,43.3845,-70.544,,trlat=46.00799974264442&trlon=-68.83732316746523&bllat=45.86474031826746&bllon=-69.05740498296133&DEM_name=USGS/NED&tilewidth=80&printres=0.4&ntilesx=1&ntilesy=1&DEMresolution=85.34&basethick=1&zscale=1.0&fileformat=STLb&maptype=roadmap&gamma=1&transp=20&hsazi=315&hselev=45&map_lat=45.93790669990562&map_lon=-68.93637774708829&map_zoom=12,9
1214,2/16/20,18:42,Art Class,Design,Art,3DP,Claremont,United States,34.0967,-117.7198,,(not set),9
1230,5/2/20,09:33,maqueta 2,Design,Modeling,3DP,Valparaiso,Chile,-33.0472,-71.6127,,(not set),9
1240,6/1/20,21:06,rendering,Design,3D Design,3DP,Kokubunji,Japan,35.7104,139.4632,,(not set),9
1261,8/28/20,09:10,Glass Art,Design,Art,3DP,Hood River,United States,45.7068,-121.5281,,(not set),9
1263,9/6/20,08:18,3D design,Design,3D Design,3DP,Jacksonville,United States,30.3322,-81.6556,,(not set),9
1272,10/16/20,18:41,modelling,Design,Modeling,3DP,Toronto,Canada,43.6532,-79.3832,,trlat=45.43250498886105&trlon=-115.99857469863893&bllat=44.660182749983676&bllon=-117.07736631698609&DEM_name=USGS/NED&tilewidth=80&printres=0.4&ntilesx=1&ntilesy=1&DEMresolution=424.95&basethick=1&zscale=1.0&fileformat=STLb&maptype=roadmap&gamma=1&transp=20&hsazi=315&hselev=45&map_lat=45.92340870301697&map_lon=-119.7990556910498&map_zoom=7,9
1283,12/7/20,02:52,3d design,Design,3D Design,3DP,Santa Clarita,United States,34.3917,-118.5426,"28542 Old Coach Ct, Santa Clarita, CA 91390, USA",place=28542%20Old%20Coach%20Ct%2C%20Santa%20Clarita%2C%20CA%2091390%2C%20USA&trlat=34.46397248031721&trlon=-118.50531069568429&bllat=34.46264560964883&bllon=-118.50745288661751&DEM_name=USGS/NED&tilewidth=80&printres=0.4&ntilesx=1&ntilesy=1&DEMresolution=0.98&basethick=1&zscale=1.0&fileformat=STLb&maptype=roadmap&gamma=1&transp=20&hsazi=315&hselev=45&map_lat=34.463309050914525&map_lon=-118.5063817911509&map_zoom=19,9
1187,9/21/19,00:06,Education,Education,Education,3DP,North Adams,United States,42.7009,-73.1087,,(not set),9
1189,9/29/19,21:11,rducation,Education,Education,3DP,Hillsboro,United States,45.5198,-122.9368,,(not set),9
1190,10/14/19,02:31,education,Education,Education,3DP,Vilnius,Lithuania,54.6872,25.2797,,(not set),9
1191,10/14/19,04:56,education,Education,Education,3DP,(not set),Montenegro,0,0,,(not set),9
1194,10/29/19,16:12,Education,Education,Education,3DP,Milwaukee,United States,43.0389,-87.9065,,(not set),9
1196,11/3/19,09:06,education,Education,Education,3DP,Massa,Italy,44.0354,10.1393,,(not set),9
1199,12/2/19,09:41,education,Education,Education,3DP,Fulton,United States,39.1512,-76.923,,(not set),9
1200,12/8/19,08:59,education,Education,Education,3DP,(not set),Hong Kong,0,0,,(not set),9
1204,1/2/20,13:02,Education,Education,Education,3DP,Marseille,France,43.2965,5.3698,,(not set),9
1205,1/5/20,20:17,education,Education,Education,3DP,Parker,United States,39.5186,-104.7614,,(not set),9
1206,1/12/20,06:31,Education,Education,Education,3DP,Mannheim,Germany,49.4875,8.466,,(not set),9
1207,1/22/20,10:24,education,Education,Education,3DP,Cologne,Germany,50.9375,6.9603,,(not set),9
1208,1/23/20,04:09,education,Education,Education,3DP,Graz,Austria,47.0707,15.4395,,(not set),9
1210,2/3/20,14:07,education,Education,Education,3DP,Schenectady,United States,42.8142,-73.9396,,(not set),9
1212,2/11/20,10:34,Education,Education,Education,3DP,(not set),United States,0,0,,(not set),9
1213,2/14/20,16:55,educativa,Education,Education,3DP,Alcazar de San Juan,Spain,39.3901,-3.2101,,(not set),9
1217,2/27/20,02:42,Education,Education,Education,3DP,Skjern,Denmark,55.9441,8.5003,,(not set),9
1220,3/23/20,07:40,FOR STUDY,Education,Education,3DP,Jeddah,Saudi Arabia,21.4858,39.1925,,(not set),9
1221,3/25/20,11:01,education,Education,Education,3DP,Thessaloniki,Greece,40.6401,22.9444,,(not set),9
1225,4/13/20,14:43,education,Education,Education,3DP,(not set),Ireland,0,0,,(not set),9
1228,4/27/20,02:46,education,Education,Education,3DP,Troyan,Bulgaria,42.8904,24.713,,(not set),9
1231,5/8/20,13:47,education,Education,Education,3DP,Jerez de la Frontera,Spain,36.685,-6.1261,,(not set),9
1232,5/10/20,19:26,education,Education,Education,3DP,Rangiora,New Zealand,-43.3034,172.5957,,(not set),9
1234,5/13/20,10:33,education,Education,Education,3DP,Saint James City,United States,26.4976,-82.0784,,(not set),9
1237,5/24/20,09:09,education,Education,Education,3DP,Redditch,United Kingdom,52.309,-1.9409,,(not set),9
1239,5/31/20,19:47,Education,Education,Education,3DP,Cizre,Turkey,37.3323,42.1855,,(not set),9
1244,6/23/20,11:31,academico,Education,Education,3DP,Ribeirao Pires,Brazil,-23.7088,-46.4038,,(not set),9
1245,6/24/20,15:45,Education,Education,Education,3DP,(not set),Iraq,0,0,,(not set),9
1246,7/1/20,13:41,education,Education,Education,3DP,(not set),Spain,0,0,,(not set),9
1247,7/2/20,02:53,Education,Education,Education,3DP,Michelstadt,Germany,49.68,9.0042,,(not set),9
1251,7/16/20,02:13,FOR STUDY,Education,Education,3DP,(not set),Oman,0,0,,(not set),9
1253,7/23/20,05:07,education,Education,Education,3DP,Michelstadt,Germany,49.68,9.0042,,(not set),9
1254,8/5/20,21:36,Education,Education,Education,3DP,Winston-Salem,United States,36.0999,-80.2442,,(not set),9
1257,8/19/20,08:49,Education,Education,Education,3DP,Wilmington,United States,34.2104,-77.8868,,(not set),9
1259,8/19/20,13:17,Education,Education,Education,3DP,Surf City,United States,34.4271,-77.5461,,(not set),9
1265,9/11/20,16:32,education,Education,Education,3DP,Ashburn,United States,39.0438,-77.4874,,(not set),9
1266,9/13/20,12:12,education,Education,Education,3DP,Mexico City,Mexico,19.4326,-99.1332,,(not set),9
1268,9/24/20,11:50,School HN,Education,Education,3DP,Heilbronn,Germany,49.1427,9.2109,,(not set),9
1269,10/2/20,11:33,Education,Education,Education,3DP,Holzkirchen,Germany,47.8811,11.6998,,(not set),9
1271,10/5/20,15:46,education,Education,Education,3DP,Lloydminster,Canada,53.278,-110.0061,,(not set),9
1275,10/29/20,13:37,education,Education,Education,3DP,St. Cloud,United States,45.5579,-94.1632,,trlat=48.623537662510806&trlon=-93.07262656348793&bllat=48.60237129734618&bllon=-93.1556525554046&DEM_name=USGS/NED&tilewidth=80&printres=0.4&ntilesx=1&ntilesy=1&DEMresolution=30.61&basethick=1&zscale=2&fileformat=STLb&maptype=roadmap&gamma=1&transp=20&hsazi=315&hselev=45&map_lat=48.61230659001883&map_lon=-93.12581253307907&map_zoom=14,9
1276,11/2/20,16:43,education,Education,Education,3DP,Denver,United States,39.7392,-104.9902,"Dallas, TX, USA",place=Dallas%2C%20TX%2C%20USA&trlat=44.746076744164014&trlon=-107.83344408340454&bllat=44.45273016368441&bllon=-108.40045591659546&DEM_name=USGS/NED&tilewidth=80&printres=0.4&ntilesx=1&ntilesy=1&DEMresolution=225.09&basethick=1&zscale=1.0&fileformat=STLb&maptype=roadmap&gamma=1&transp=20&hsazi=315&hselev=45&map_lat=32.820896764632394&map_lon=-96.73154242578549&map_zoom=11,9
1277,11/8/20,13:23,Education,Education,Education,3DP,Madrid,Spain,40.4168,-3.7038,"29711 Alcauc�_n, M��laga, Espa̱a",place=29711%20Alcauc%C3%ADn%2C%20M%C3%A1laga%2C%20Espa%C3%B1a&trlat=44.746076744164014&trlon=-107.83374686568678&bllat=44.45273016368441&bllon=-108.40015313431323&DEM_name=USGS/NED&tilewidth=80&printres=0.4&ntilesx=1&ntilesy=1&DEMresolution=224.85&basethick=1&zscale=1.0&fileformat=STLb&maptype=roadmap&gamma=1&transp=20&hsazi=315&hselev=45&map_lat=36.90359431965232&map_lon=-4.143047531409231&map_zoom=19,9
1278,11/14/20,22:28,Education,Education,Education,3DP,(not set),United Arab Emirates,0,0,,trlat=43.11597997690302&trlon=-117.84910948492887&bllat=42.51155687174352&bllon=-118.84518892981411&DEM_name=USGS/NED&tilewidth=100&printres=0.2&ntilesx=1&ntilesy=1&DEMresolution=325.86&basethick=5&zscale=5&fileformat=STLb&maptype=roadmap&gamma=1&transp=20&hsazi=315&hselev=45&map_lat=42.73982943532803&map_lon=-118.49821121909024&map_zoom=10,9
1279,11/18/20,02:19,education,Education,Education,3DP,Pimpri-Chinchwad,India,18.6298,73.7997,,trlat=44.72644679452277&trlon=-107.98671623535157&bllat=44.461758489838516&bllon=-108.35842033691408&DEM_name=USGS/NED&tilewidth=80&printres=0.4&ntilesx=1&ntilesy=1&DEMresolution=147.57&basethick=1&zscale=1.0&fileformat=STLb&maptype=roadmap&gamma=1&transp=20&hsazi=315&hselev=45&map_lat=18.25066169367299&map_lon=73.67971709840893&map_zoom=15,9
1280,11/20/20,09:33,education,Education,Education,3DP,Ferrara,Italy,44.8381,11.6198,"33018 Tarvisio UD, Italia",place=33018%20Tarvisio%20UD%2C%20Italia&trlat=46.520907799199634&trlon=13.566699362254333&bllat=46.496971362452925&bllon=13.512007332301357&DEM_name=USGS/NED&tilewidth=180&printres=0.4&ntilesx=1&ntilesy=1&DEMresolution=9.33&basethick=1&zscale=1.5&fileformat=STLb&maptype=hybrid&gamma=1&transp=20&hsazi=315&hselev=45&map_lat=46.50195035982548&map_lon=13.550526314611572&map_zoom=14,9
1284,12/9/20,12:03,education,Education,Education,3DP,Cape Town,South Africa,-33.9249,18.4241,,trlat=44.746076744164014&trlon=-107.87006517715454&bllat=44.45273016368441&bllon=-108.36383482284546&DEM_name=USGS/NED&tilewidth=80&printres=0.4&ntilesx=1&ntilesy=1&DEMresolution=196.01&basethick=1&zscale=1.0&fileformat=obj&maptype=terrain&gamma=1&transp=20&hsazi=315&hselev=45&map_lat=44.59982&map_lon=-108.11695&map_zoom=11,9
1285,12/9/20,14:08,Education,Education,Education,3DP,Glendale,United States,34.1425,-118.2551,"Antelope Island, Utah, USA",place=Antelope%20Island%2C%20Utah%2C%20USA&trlat=41.07460048119038&trlon=-112.14218020696705&bllat=40.83087352319373&bllon=-112.29514479894705&DEM_name=USGS/NED&tilewidth=80&printres=0.4&ntilesx=1&ntilesy=1&DEMresolution=64.39&basethick=1&zscale=1.0&fileformat=STLb&maptype=roadmap&gamma=1&transp=20&hsazi=315&hselev=45&map_lat=40.875413841437094&map_lon=-112.31147229929036&map_zoom=11,9
1188,9/25/19,17:28,home plan,Map,Property,3DP,Boulder,United States,40.015,-105.2705,,(not set),9
1193,10/17/19,08:27,heightmap,Map,Map,3DP,(not set),Serbia,0,0,,(not set),9
1197,11/9/19,09:36,monteidda,Map,Map,3DP,Olbia,Italy,40.9236,9.4964,,(not set),9
1219,3/21/20,13:23,ulla sweg,Map,Map,3DP,Reykjavik,Iceland,64.1466,-21.9426,,(not set),9
1236,5/14/20,10:56,home sign,Map,Property,3DP,Broken Bow,United States,34.0293,-94.7391,,(not set),9
1243,6/13/20,07:49,PACOSTANE,Map,Map,3DP,Orleans,France,47.903,1.9093,,(not set),9
1249,7/3/20,01:28,IM-AP-DEM,Map,Map,3DP,(not set),Chile,0,0,,(not set),9
1250,7/12/20,16:58,aracatuba,Map,Map,3DP,Curitiba,Brazil,-25.4809,-49.3044,,(not set),9
1192,10/14/19,15:43,curiosity,Misc,Curious,3DP,Sant Cugat del Valles,Spain,41.4721,2.0865,,(not set),9
1211,2/9/20,10:54,hobby CNC,Misc,Personal,CNC,Hamilton,Canada,43.2557,-79.8711,,(not set),9
1215,2/26/20,02:58,hobby use,Misc,Personal,3DP,Rome,Italy,41.9028,12.4964,,(not set),9
1222,4/3/20,02:29,Hobby map,Misc,Personal,3DP,Malmesbury,United Kingdom,51.5864,-2.1028,,(not set),9
1224,4/11/20,17:05,fun stuff,Misc,Fun,3DP,Larkspur,United States,37.9341,-122.5353,,(not set),9
1242,6/13/20,04:51,personnal,Misc,Personal,3DP,Orleans,France,47.903,1.9093,,(not set),9
1286,12/10/20,10:14,curiosity,Misc,Curious,3DP,Bordeaux,France,44.8378,-0.5792,,trlat=45.84460853815415&trlon=-109.52470939065981&bllat=41.068450661517275&bllon=-117.72030274774599&DEM_name=USGS/NED&tilewidth=80&printres=0.4&ntilesx=1&ntilesy=1&DEMresolution=3316.54&basethick=1&zscale=1.0&fileformat=STLb&maptype=roadmap&gamma=1&transp=0&hsazi=315&hselev=45&map_lat=43.562896757901875&map_lon=-113.6225060692029&map_zoom=7,9
1287,12/10/20,17:47,curiosity,Misc,Curious,3DP,Houston,United States,29.7604,-95.3698,,trlat=49.09484689795895&trlon=-59.71332689590455&bllat=23.749309365157767&bllon=-126.11041685409548&DEM_name=USGS/NED&tilewidth=80&printres=0.4&ntilesx=1&ntilesy=1&DEMresolution=29772.71&basethick=1&zscale=1.0&fileformat=STLb&maptype=roadmap&gamma=1&transp=20&hsazi=315&hselev=45&map_lat=44.59982&map_lon=-108.11695&map_zoom=3,9
1288,12/10/20,10:14,curiosity,Misc,Curious,3DP,Bordeaux,France,44.8378,-0.5792,,trlat=45.84460853815415&trlon=-109.52470939065981&bllat=41.068450661517275&bllon=-117.72030274774599&DEM_name=USGS/NED&tilewidth=80&printres=0.4&ntilesx=1&ntilesy=1&DEMresolution=3316.54&basethick=1&zscale=1.0&fileformat=STLb&maptype=roadmap&gamma=1&transp=0&hsazi=315&hselev=45&map_lat=43.562896757901875&map_lon=-113.6225060692029&map_zoom=7,9
1289,12/10/20,17:47,curiosity,Misc,Curious,3DP,Houston,United States,29.7604,-95.3698,,trlat=49.09484689795895&trlon=-59.71332689590455&bllat=23.749309365157767&bllon=-126.11041685409548&DEM_name=USGS/NED&tilewidth=80&printres=0.4&ntilesx=1&ntilesy=1&DEMresolution=29772.71&basethick=1&zscale=1.0&fileformat=STLb&maptype=roadmap&gamma=1&transp=20&hsazi=315&hselev=45&map_lat=44.59982&map_lon=-108.11695&map_zoom=3,9
1216,2/26/20,13:05,Ski Model,Recreation,Ski,3DP,(not set),United States,0,0,,(not set),9
1229,4/29/20,18:50,Minecraft,Recreation,Gaming,3DP,San Jose,United States,37.3382,-121.8863,,(not set),9
1241,6/3/20,20:31,FAA radar,Recreation,Aviation,3DP,Federal Way,United States,47.3223,-122.3126,,(not set),9
1209,1/29/20,01:56,testprint,Test,Test,3DP,Amsterdam,Netherlands,52.3667,4.8945,,(not set),9
1260,8/27/20,05:10,3-d print,Test,Test,3DP,Wilkes-Barre,United States,41.2459,-75.8813,,(not set),9
1262,8/29/20,15:34,3-d print,Test,Test,3DP,Hazleton,United States,40.9584,-75.9746,,(not set),9
1264,9/7/20,16:05,3D relief,Test,Test,3DP,Utica,United States,43.1009,-75.2327,,(not set),9
1281,11/25/20,04:59,exploring,Test,Test,3DP,Ghent,Belgium,51.0543,3.7174,"Yosemite National Park, California, Verenigde Staten",place=Yosemite%20National%20Park%2C%20California%2C%20Verenigde%20Staten&trlat=37.80914075744405&trlon=-119.46977643197175&bllat=37.64621487498059&bllon=-119.75328234856721&DEM_name=USGS/NED&tilewidth=80&printres=0.2&ntilesx=1&ntilesy=1&DEMresolution=62.48&basethick=1&zscale=1.0&fileformat=STLb&maptype=roadmap&gamma=1&transp=40&hsazi=315&hselev=45&map_lat=37.72777862564845&map_lon=-119.61152939026948&map_zoom=12,9
1252,7/16/20,17:28,Prototipo,Test,Test,3DP,Madrid,Spain,40.4168,-3.7038,,(not set),9
1298,10/10/19,17:08,wall map,Crafts,Wall Art,3DP,Tucson,United States,32.2226,-110.9747,,(not set),8
1320,1/14/20,15:34,wall art,Crafts,Wall Art,3DP,Courtenay,Canada,49.6841,-124.9904,,(not set),8
1330,1/28/20,11:39,wall art,Crafts,Wall Art,3DP,Monticello,United States,40.7453,-86.7647,,(not set),8
1333,2/4/20,08:41,Wall art,Crafts,Wall Art,3DP,Billerica,United States,42.5584,-71.2689,,(not set),8
1371,6/23/20,21:15,GiftTest,Crafts,Gift,3DP,Las Vegas,United States,36.1699,-115.1398,,(not set),8
1374,7/7/20,09:51,Memories,Crafts,Memento,3DP,Lehi,United States,40.3916,-111.8508,,(not set),8
1390,9/9/20,07:38,a trophy,Crafts,Trophy,3DP,Lely Resort,United States,26.0809,-81.6979,,(not set),8
1403,10/26/20,17:18,VCarving,Crafts,Carving,CNC,Montgomery,United States,32.3792,-86.3077,,trlat=32.833675836076935&trlon=-85.93061109848023&bllat=32.82040632764863&bllon=-85.94628950424196&DEM_name=USGS/NED&tilewidth=80&printres=0.4&ntilesx=1&ntilesy=1&DEMresolution=7.34&basethick=1&zscale=1.0&fileformat=STLb&maptype=roadmap&gamma=1&transp=20&hsazi=315&hselev=45&map_lat=32.82494712763336&map_lon=-85.94110984202432&map_zoom=15,8
1415,11/18/20,13:25,CNC Mill,Crafts,Carving,CNC,Philadelphia,United States,39.9526,-75.1652,,trlat=44.746076744164014&trlon=-107.89200778428167&bllat=44.45273016368441&bllon=-108.34189221571833&DEM_name=USGS/NED&tilewidth=80&printres=0.2&ntilesx=1&ntilesy=1&DEMresolution=89.3&basethick=1&zscale=1.0&fileformat=STLb&maptype=roadmap&gamma=1&transp=20&hsazi=315&hselev=45&map_lat=44.59982&map_lon=-108.11695&map_zoom=11,8
1416,11/19/20,14:57,wall map,Crafts,Wall Art,3DP,Trondheim Municipality,Norway,63.3687,10.3831,,trlat=71.32950001780726&trlon=33.47661683936803&bllat=57.781877791843854&bllon=2.944695452649291&DEM_name=USGS/GTOPO30&tilewidth=80&printres=0.4&ntilesx=1&ntilesy=1&DEMresolution=7321.2&basethick=1&zscale=10&fileformat=STLb&maptype=roadmap&gamma=1&transp=0&hsazi=315&hselev=45&map_lat=65.56349224782268&map_lon=18.675175572722683&map_zoom=5,8
1417,11/21/20,05:21,wall map,Crafts,Wall Art,3DP,Trondheim Municipality,Norway,63.3687,10.3831,,trlat=71.23466837932214&trlon=31.243479427558775&bllat=57.89369082501301&bllon=4.441874202949387&DEM_name=MERIT/DEM/v1_0_3&tilewidth=80&printres=0.4&ntilesx=5&ntilesy=5&DEMresolution=1284.94&basethick=1&zscale=1.0&fileformat=STLb&maptype=roadmap&gamma=0.3&transp=20&hsazi=315&hselev=55&map_lat=64.77862020797798&map_lon=13.689844784004102&map_zoom=5,8
1426,12/1/20,02:14,wall map,Crafts,Wall Art,3DP,Trondheim Municipality,Norway,63.3687,10.3831,,trlat=55.33651878764774&trlon=15.290820556411386&bllat=54.97639312093513&bllon=14.604332404861067&DEM_name=JAXA/ALOS/AW3D30/V2_2&tilewidth=200&printres=0.4&ntilesx=1&ntilesy=1&DEMresolution=87.52&basethick=0&zscale=20&fileformat=STLb&maptype=roadmap&gamma=1&transp=20&hsazi=315&hselev=45&map_lat=55.26858577806393&map_lon=14.854469304817837&map_zoom=10,8
1428,12/4/20,13:14,cnc sign,Crafts,Carving,CNC,Fort Saskatchewan,Canada,53.6963,-113.2164,"Salt Spring Island, BC, Canada",place=Salt%20Spring%20Island%2C%20BC%2C%20Canada&trlat=44.74110604719096&trlon=-107.9179765827179&bllat=44.4577566761454&bllon=-108.31592341728211&DEM_name=USGS/NED&tilewidth=80&printres=0.4&ntilesx=1&ntilesy=1&DEMresolution=157.97&basethick=1&zscale=1.0&fileformat=STLb&maptype=roadmap&gamma=1&transp=0&hsazi=315&hselev=45&map_lat=48.780784774738585&map_lon=-123.51715893361965&map_zoom=11,8
1429,12/7/20,14:50,CNC File,Crafts,Carving,CNC,Westlock,Canada,54.1521,-113.8508,,trlat=50.95929811801742&trlon=-102.74219674867803&bllat=50.903697723808875&bllon=-102.8674666385096&DEM_name=USGS/NED&tilewidth=80&printres=0.4&ntilesx=1&ntilesy=1&DEMresolution=44.03&basethick=1&zscale=1.0&fileformat=STLb&maptype=roadmap&gamma=1&transp=30&hsazi=315&hselev=45&map_lat=50.8872475566362&map_lon=-102.81641118634927&map_zoom=12,8
1293,9/22/19,22:34,Arch viz,Design,Architecture,3DP,Riyadh,Saudi Arabia,24.7136,46.6753,,(not set),8
1325,1/24/20,16:06,art show,Design,Art,3DP,Oslo Municipality,Norway,59.9139,10.7521,,(not set),8
1357,5/7/20,21:03,maya uni,Design,3D Design,3DP,Auckland,New Zealand,-36.8485,174.7633,,(not set),8
1383,8/13/20,04:22,3d model,Design,3D Design,3DP,Zvolen,Slovakia,48.5762,19.1371,,(not set),8
1384,8/16/20,15:02,3d model,Design,3D Design,3DP,Eregli,Turkey,41.2799,31.4203,,(not set),8
1385,8/29/20,10:00,modeling,Design,Modeling,3DP,Gloucester,United States,42.6159,-70.662,,(not set),8
1409,11/6/20,06:04,modeling,Design,Modeling,3DP,Zurich,Switzerland,47.3769,8.5417,,trlat=44.74110604719096&trlon=-107.9179765827179&bllat=44.4577566761454&bllon=-108.31592341728211&DEM_name=USGS/NED&tilewidth=80&printres=0.4&ntilesx=1&ntilesy=1&DEMresolution=157.97&basethick=1&zscale=1.0&fileformat=STLb&maptype=roadmap&gamma=1&transp=20&hsazi=315&hselev=45&map_lat=44.59982&map_lon=-108.11695&map_zoom=11,8
1420,11/24/20,04:22,modeling,Design,Modeling,3DP,Vilnius,Lithuania,54.6872,25.2797,"U�_utrakio dvaro sodyba dvaras, U�_trakio g. 17, Trakai 21102, Lithuania",place=U%C5%BEutrakio%20dvaro%20sodyba%20dvaras%2C%20U%C5%BEtrakio%20g.%2017%2C%20Trakai%2021102%2C%20Lithuania&trlat=44.746076744164014&trlon=-107.89200778428167&bllat=44.45273016368441&bllon=-108.34189221571833&DEM_name=USGS/NED&tilewidth=80&printres=0.4&ntilesx=1&ntilesy=1&DEMresolution=178.59&basethick=1&zscale=1.0&fileformat=STLb&maptype=roadmap&gamma=1&transp=20&hsazi=315&hselev=45&map_lat=54.65895840910064&map_lon=24.94280247481465&map_zoom=17,8
1292,9/15/19,17:15,Uni site,Education,College,3DP,Auckland,New Zealand,-36.8485,174.7633,,(not set),8
1300,10/26/19,02:12,teaching,Education,Teaching,3DP,Atascadero,United States,35.4894,-120.6707,,(not set),8
1311,11/13/19,08:02,Teaching,Education,Teaching,3DP,Madrid,Spain,40.4168,-3.7038,,(not set),8
1326,1/25/20,13:00,studying,Education,Education,3DP,Caracas,Venezuela,10.4806,-66.9036,,(not set),8
1327,1/27/20,03:12,To learn,Education,Learning,3DP,Pune,India,18.5204,73.8567,,(not set),8
1329,1/28/20,07:20,teaching,Education,Teaching,3DP,Madrid,Spain,40.4168,-3.7038,,(not set),8
1331,1/30/20,19:09,teaching,Education,Teaching,3DP,(not set),Canada,0,0,,(not set),8
1332,2/2/20,17:28,teaching,Education,Teaching,3DP,(not set),Canada,0,0,,(not set),8
1341,2/23/20,04:33,Learning,Education,Learning,3DP,(not set),United Kingdom,0,0,,(not set),8
1365,6/5/20,08:58,teaching,Education,Teaching,3DP,Concarneau,France,47.8728,-3.9207,,(not set),8
1375,7/12/20,03:53,training,Education,Learning,3DP,(not set),India,0,0,,(not set),8
1386,9/1/20,17:45,Learning,Education,Learning,3DP,Boise,United States,43.615,-116.2023,,(not set),8
1387,9/1/20,17:56,learning,Education,Learning,3DP,Boise,United States,43.615,-116.2023,,(not set),8
1392,9/26/20,09:35,academic,Education,Education,3DP,Rio Grande,Brazil,-32.0395,-52.1014,,(not set),8
1398,10/11/20,09:10,learning,Education,Learning,3DP,Dammam,Saudi Arabia,26.4207,50.0888,,(not set),8
1400,10/18/20,06:47,teaching,Education,Teaching,3DP,Nairobi,Kenya,-1.2921,36.8219,,trlat=-0.5502322920848705&trlon=37.011348751078515&bllat=-0.6230112398659812&bllon=36.78832058485894&DEM_name=USGS/NED&tilewidth=80&printres=0.4&ntilesx=1&ntilesy=1&DEMresolution=124.13&basethick=1&zscale=1.0&fileformat=STLb&maptype=roadmap&gamma=1&transp=20&hsazi=315&hselev=45&map_lat=-0.38875481640647774&map_lon=36.602444254750125&map_zoom=10,8
1401,10/20/20,07:47,academic,Education,Education,3DP,Rio Grande,Brazil,-32.0408,-52.1017,,trlat=-31.167048903519074&trlon=-50.87456616652089&bllat=-31.264823186858262&bllon=-50.99762770426351&DEM_name=JAXA/ALOS/AW3D30/V2_2&tilewidth=80&printres=0.4&ntilesx=1&ntilesy=1&DEMresolution=58.63&basethick=1&zscale=1.0&fileformat=STLb&maptype=roadmap&gamma=1&transp=20&hsazi=315&hselev=45&map_lat=-31.226011414609836&map_lon=-50.967181635089126&map_zoom=13,8
1402,10/25/20,11:12,teaching,Education,Teaching,3DP,New Orleans,United States,29.9511,-90.0715,Himalayas,place=Himalayas&trlat=31.013359078855494&trlon=87.51053654128783&bllat=26.57140446047448&bllon=80.69901310378783&DEM_name=USGS/NED&tilewidth=80&printres=0.4&ntilesx=1&ntilesy=1&DEMresolution=3325.15&basethick=1&zscale=1.0&fileformat=STLb&maptype=roadmap&gamma=1&transp=20&hsazi=315&hselev=45&map_lat=28.768613371591666&map_lon=84.40140568191283&map_zoom=7,8
1405,10/29/20,13:13,School:),Education,Education,3DP,Charlotte,United States,35.2271,-80.8431,"2010 The Plaza, Charlotte, NC 28205, USA",place=2010%20The%20Plaza%2C%20Charlotte%2C%20NC%2028205%2C%20USA&trlat=44.746076744164014&trlon=-107.86976119346619&bllat=44.45273016368441&bllon=-108.36413880653382&DEM_name=USGS/NED&tilewidth=80&printres=0.4&ntilesx=1&ntilesy=1&DEMresolution=196.25&basethick=1&zscale=1.0&fileformat=STLb&maptype=roadmap&gamma=1&transp=20&hsazi=315&hselev=45&map_lat=35.228850154865306&map_lon=-80.80789291350241&map_zoom=18,8
1411,11/10/20,13:32,homework,Education,Learning,3DP,Mexico City,Mexico,19.4326,-99.1332,,trlat=19.852987692419227&trlon=-90.50213722691566&bllat=19.82509319264131&bllon=-90.53664939017197&DEM_name=JAXA/ALOS/AW3D30/V2_2&tilewidth=80&printres=0.4&ntilesx=1&ntilesy=1&DEMresolution=18.08&basethick=1&zscale=1.0&fileformat=obj&maptype=roadmap&gamma=1&transp=40&hsazi=315&hselev=45&map_lat=19.83563047357702&map_lon=-90.51945768156017&map_zoom=15,8
1424,11/28/20,09:29,learning,Education,Learning,3DP,Haaksbergen,Netherlands,52.1581,6.7473,,trlat=50.84352190143713&trlon=-103.50296969834419&bllat=49.75938040197688&bllon=-105.71066662978083&DEM_name=USGS/NED&tilewidth=80&printres=0.4&ntilesx=1&ntilesy=1&DEMresolution=786.45&basethick=1&zscale=1.0&fileformat=STLb&maptype=roadmap&gamma=1&transp=20&hsazi=315&hselev=45&map_lat=42.68177688757174&map_lon=-112.57133095928694&map_zoom=5,8
1425,11/29/20,12:41,learning,Education,Learning,3DP,Fukuoka,Japan,33.5902,130.4017,,trlat=35.365625383607764&trlon=138.73449936352972&bllat=35.35974577460649&bllon=138.72679194599465&DEM_name=USGS/NED&tilewidth=100&printres=0.5&ntilesx=1&ntilesy=1&DEMresolution=3.5&basethick=0.5&zscale=1.0&fileformat=STLb&maptype=hybrid&gamma=0.3&transp=0&hsazi=180&hselev=55&map_lat=35.361769258401964&map_lon=138.729934445166&map_zoom=16,8
1430,12/11/20,15:45,learning,Education,Learning,3DP,Washington,United States,38.9072,-77.0369,,trlat=44.70414775502857&trlon=-107.97013087972701&bllat=44.495069039123976&bllon=-108.263769120273&DEM_name=USGS/NED&tilewidth=80&printres=0.4&ntilesx=1&ntilesy=1&DEMresolution=116.57&basethick=3&zscale=1.0&fileformat=STLb&maptype=roadmap&gamma=1&transp=20&hsazi=315&hselev=45&map_lat=44.59982&map_lon=-108.11695&map_zoom=11,8
1291,9/15/19,12:15,Home use,Map,Property,3DP,Bear Creek,United States,30.1891,-97.9447,,(not set),8
1304,11/6/19,08:27,fly over,Map,Map,3DP,Llanelli,United Kingdom,51.6809,-4.1602,,(not set),8
1324,1/23/20,19:24,home map,Map,Property,3DP,Prague,Czechia,50.0755,14.4378,,(not set),8
1367,6/14/20,03:26,ANDERNOS,Map,Map,3DP,Orleans,France,47.903,1.9093,,(not set),8
1290,9/10/19,21:30,personal,Misc,Personal,3DP,Norwood,United States,39.1645,-84.4543,,(not set),8
1295,10/4/19,10:47,PErsonal,Misc,Personal,3DP,New York,United States,40.7128,-74.006,,(not set),8
1296,10/5/19,01:15,personal,Misc,Personal,3DP,Poitiers,France,46.5802,0.3404,,(not set),8
1303,11/4/19,17:09,personal,Misc,Personal,3DP,Chino Hills,United States,33.9898,-117.7326,,(not set),8
1314,12/1/19,15:45,personal,Misc,Personal,3DP,Milton,Canada,43.5183,-79.8774,,(not set),8
1318,1/7/20,14:08,Personal,Misc,Personal,3DP,Linkoping,Sweden,58.4108,15.6214,,(not set),8
1322,1/17/20,00:56,personal,Misc,Personal,3DP,Hyderabad,India,17.385,78.4867,,(not set),8
1335,2/7/20,16:36,my files,Misc,Message,3DP,Laguna Niguel,United States,33.5237,-117.7149,,(not set),8
1340,2/16/20,04:36,personal,Misc,Personal,3DP,Sint-Niklaas,Belgium,51.1559,4.1544,,(not set),8
1347,3/16/20,07:54,PERSONEL,Misc,Personal,3DP,Saint-Germain-en-Laye,France,48.8989,2.0938,,(not set),8
1348,3/18/20,16:56,personal,Misc,Personal,3DP,San Diego,United States,32.7157,-117.1611,,(not set),8
1352,4/3/20,17:32,personal,Misc,Personal,3DP,Ripon,United Kingdom,54.1361,-1.5238,,(not set),8
1354,4/8/20,15:23,personal,Misc,Personal,3DP,St. George,United States,37.0965,-113.5684,,(not set),8
1363,5/29/20,11:36,personal,Misc,Personal,3DP,Glendale,United States,34.1425,-118.2551,,(not set),8
1377,7/13/20,18:01,Personal,Misc,Personal,3DP,(not set),United States,0,0,,(not set),8
1397,10/11/20,03:20,personal,Misc,Personal,3DP,Brighton,United Kingdom,50.8225,-0.1372,,(not set),8
1407,11/2/20,07:43,personal,Misc,Personal,3DP,Prague,Czechia,50.0755,14.4378,,trlat=49.63857858885992&trlon=22.662161385345428&bllat=47.68326001293965&bllon=16.744807755279524&DEM_name=USGS/NED&tilewidth=80&printres=0.4&ntilesx=1&ntilesy=1&DEMresolution=2179.57&basethick=3&zscale=1.5&fileformat=STLb&maptype=roadmap&gamma=1&transp=20&hsazi=315&hselev=45&map_lat=47.06224208721922&map_lon=15.011185191578331&map_zoom=6,8
1408,11/6/20,06:04,for work,Misc,Commercial,3DP,Istanbul,Turkey,41.0082,28.9784,"Cihangir, Somuncu Sk., 34433 Beyo��lu/��stanbul, Turkey",place=Cihangir%2C%20Somuncu%20Sk.%2C%2034433%20Beyo%C4%9Flu/%C4%B0stanbul%2C%20Turkey&trlat=41.04107196093634&trlon=28.99764126860645&bllat=41.02422406030387&bllon=28.97530651413944&DEM_name=USGS/NED&tilewidth=80&printres=0.4&ntilesx=1&ntilesy=1&DEMresolution=9.39&basethick=1&zscale=1.0&fileformat=STLb&maptype=roadmap&gamma=1&transp=20&hsazi=315&hselev=45&map_lat=41.03264922323895&map_lon=28.986473891372945&map_zoom=15,8
1412,11/13/20,15:33,home use,Misc,Personal,3DP,Bratislava,Slovakia,48.1486,17.1077,,trlat=44.746076744164014&trlon=-107.73319383926392&bllat=44.45273016368441&bllon=-108.50070616073609&DEM_name=JAXA/ALOS/AW3D30/V2_2&tilewidth=300&printres=0.4&ntilesx=1&ntilesy=1&DEMresolution=81.25&basethick=1&zscale=1.0&fileformat=STLb&maptype=roadmap&gamma=1&transp=20&hsazi=315&hselev=45&map_lat=49.172418310365686&map_lon=19.959373215362316&map_zoom=12,8
1422,11/28/20,04:28,personal,Misc,Personal,3DP,Abingdon,United Kingdom,51.6708,-1.288,,trlat=59.46385662032123&trlon=2.7617832099923634&bllat=49.82964310146004&bllon=-11.085752042578749&DEM_name=USGS/NED&tilewidth=80&printres=0.4&ntilesx=1&ntilesy=1&DEMresolution=4469.64&basethick=1&zscale=1.0&fileformat=STLb&maptype=roadmap&gamma=1&transp=40&hsazi=315&hselev=45&map_lat=55.11046666572072&map_lon=-5.326535197543203&map_zoom=6,8
1328,1/27/20,03:14,wargames,Recreation,Gaming,3DP,Sydney,Australia,-33.8688,151.2093,,(not set),8
1336,2/8/20,19:24,sski map,Recreation,Ski,3DP,(not set),United States,0,0,,(not set),8
1337,2/10/20,06:57,trekking,Recreation,Hiking,3DP,Santiago,Chile,-33.4489,-70.6693,,(not set),8
1360,5/18/20,16:18,scouting,Recreation,Hiking,3DP,London,United Kingdom,51.5074,-0.1278,,(not set),8
1361,5/22/20,04:56,Climbing,Recreation,Climbing,3DP,Tehran,Iran,35.6892,51.389,,(not set),8
1364,5/31/20,04:30,pleasure,Recreation,Leisure,3DP,(not set),France,49.5943,0.13,,(not set),8
1410,11/7/20,07:38,Planning,Recreation,Tourism,3DP,Bacolod,Philippines,10.684,122.9563,,trlat=11.97510203042585&trlon=123.60296056956507&bllat=8.853344671646447&bllon=121.76824377269007&DEM_name=JAXA/ALOS/AW3D30/V2_2&tilewidth=70&printres=0.4&ntilesx=1&ntilesy=1&DEMresolution=1147.98&basethick=1&zscale=1.0&fileformat=STLb&maptype=roadmap&gamma=2.5&transp=0&hsazi=90&hselev=10&map_lat=9.979628206050677&map_lon=123.96013504304024&map_zoom=8,8
1297,10/6/19,16:17,research,Research,Research,3DP,Burton upon Trent,United Kingdom,52.814,-1.6371,,(not set),8
1310,11/11/19,10:13,research,Research,Research,3DP,(not set),Iran,0,0,,(not set),8
1316,12/17/19,00:08,Research,Research,Research,3DP,Berea,South Africa,-29.8518,30.9934,,(not set),8
1321,1/16/20,22:11,research,Research,Research,3DP,Hyderabad,India,17.385,78.4867,,(not set),8
1323,1/17/20,11:04,research,Research,Research,3DP,Montreal,Canada,45.5017,-73.5673,,(not set),8
1358,5/11/20,19:11,research,Research,Research,3DP,Wilton,United States,41.5889,-91.0168,,(not set),8
1372,6/29/20,13:28,research,Research,Research,3DP,Peshawar,Pakistan,34.0151,71.5249,,(not set),8
1373,7/2/20,18:03,Research,Research,Research,3DP,Redding,United States,40.5865,-122.3917,,(not set),8
1376,7/13/20,16:37,Research,Research,Research,3DP,Redding,United States,40.5865,-122.3917,,(not set),8
1389,9/4/20,07:50,research,Research,Research,3DP,Montreal,Canada,45.5017,-73.5673,,(not set),8
1393,10/4/20,17:07,research,Research,Research,3DP,Boise,United States,43.615,-116.2023,,(not set),8
1413,11/16/20,13:23,research,Research,Research,3DP,San Luis Obispo,United States,35.2828,-120.6596,"Morro Bay, CA, USA",place=Morro%20Bay%2C%20CA%2C%20USA&trlat=44.67469784760734&trlon=-108.01163574523926&bllat=44.5247244008339&bllon=-108.22226425476074&DEM_name=USGS/NED&tilewidth=80&printres=0.4&ntilesx=1&ntilesy=1&DEMresolution=83.61&basethick=1&zscale=1.0&fileformat=STLb&maptype=roadmap&gamma=1&transp=20&hsazi=315&hselev=45&map_lat=35.36405748265291&map_lon=-120.85951879620362&map_zoom=14,8
1294,9/25/19,03:41,Practice,Test,Test,3DP,Gurgaon,India,28.4595,77.0266,,(not set),8
1299,10/15/19,07:40,3D PRint,Test,Test,3DP,Graz,Austria,47.0707,15.4395,,(not set),8
1301,10/26/19,18:33,3d print,Test,Test,3DP,Boulder,United States,40.015,-105.2705,,(not set),8
1302,10/29/19,12:37,3d print,Test,Test,3DP,Jamison,United States,40.2549,-75.089,,(not set),8
1305,11/7/19,21:46,3d print,Test,Test,3DP,Bangkok,Thailand,13.7563,100.5018,,(not set),8
1312,11/16/19,14:43,3D Print,Test,Test,3DP,Green Valley,United States,31.8542,-110.9937,,(not set),8
1315,12/12/19,00:59,3d print,Test,Test,3DP,Toronto,Canada,43.6532,-79.3832,,(not set),8
1317,12/18/19,11:27,3d print,Test,Test,3DP,Hamilton,Canada,43.2557,-79.8711,,(not set),8
1319,1/10/20,15:05,practice,Test,Test,3DP,Renton,United States,47.4797,-122.2079,,(not set),8
1334,2/4/20,12:46,3d print,Test,Test,3DP,Martinsburg,United States,39.4562,-77.9639,,(not set),8
1338,2/12/20,03:48,3d print,Test,Test,3DP,Big Bear Lake,United States,34.2439,-116.9114,,(not set),8
1339,2/14/20,15:12,Test CNC,Test,Test,CNC,Brookfield,United States,43.0606,-88.1065,,(not set),8
1342,2/25/20,20:47,practice,Test,Test,3DP,Jasper,United States,33.8312,-87.2775,,(not set),8
1343,2/27/20,13:55,3d print,Test,Test,3DP,Prague,Czechia,50.0755,14.4378,,(not set),8
1345,2/28/20,12:14,Practice,Test,Test,3DP,Seymour,United States,35.8726,-83.774,,(not set),8
1346,2/28/20,12:23,practice,Test,Test,3DP,Seymour,United States,35.8726,-83.774,,(not set),8
1350,3/29/20,19:21,printing,Test,Test,3DP,Leipzig,Germany,51.3397,12.3731,,(not set),8
1351,3/31/20,05:16,checking,Test,Test,3DP,Dubai,United Arab Emirates,25.2048,55.2708,,(not set),8
1353,4/7/20,14:05,printing,Test,Test,3DP,Vienna,Austria,48.2082,16.3738,,(not set),8
1355,4/10/20,23:36,printing,Test,Test,3DP,Basking Ridge,United States,40.7066,-74.5493,,(not set),8
1356,4/14/20,08:33,3d print,Test,Test,3DP,Toyota,Japan,35.0826,137.1561,,(not set),8
1359,5/13/20,15:52,printing,Test,Test,3DP,Sandton,South Africa,-26.1076,28.0567,,(not set),8
1362,5/23/20,19:48,3-dprint,Test,Test,3DP,Rantoul,United States,40.3084,-88.1559,,(not set),8
1366,6/7/20,11:49,3d print,Test,Test,3DP,Barcelona,Spain,41.3851,2.1734,,(not set),8
1369,6/17/20,11:34,pure fun,Test,Test,3DP,Ioannina,Greece,39.665,20.8537,,(not set),8
1370,6/19/20,04:45,3D Print,Test,Test,3DP,Makassar,Indonesia,-5.1477,119.4327,,(not set),8
1378,7/14/20,06:15,3d print,Test,Test,3DP,(not set),Italy,0,0,,(not set),8
1379,7/15/20,23:20,more fun,Test,Test,3DP,Wellington,New Zealand,-41.2865,174.7762,,(not set),8
1380,7/21/20,16:42,printing,Test,Test,3DP,Wausau,United States,44.9591,-89.6301,,(not set),8
1381,7/29/20,22:20,Rocketry,Test,Test,3DP,(not set),United States,0,0,,(not set),8
1382,8/1/20,00:27,Test cnc,Test,Test,CNC,Flagstaff,United States,35.1983,-111.6513,,(not set),8
1388,9/2/20,00:05,test stl,Test,Test,3DP,Johor Bahru,Malaysia,1.4927,103.7414,,(not set),8
1391,9/17/20,20:52,3d print,Test,Test,3DP,Castle Rock,United States,39.3722,-104.8561,,(not set),8
1394,10/7/20,01:14,3d print,Test,Test,3DP,Denver,United States,39.7392,-104.9902,,(not set),8
1395,10/7/20,18:38,printing,Test,Test,3DP,Toronto,Canada,43.6532,-79.3832,,(not set),8
1404,10/27/20,19:24,3d print,Test,Test,3DP,Biddeford,United States,43.4926,-70.4534,,trlat=43.70616431046525&trlon=-70.18006572336465&bllat=43.63166242515101&bllon=-70.29253683122381&DEM_name=USGS/NED&tilewidth=50&printres=0.3&ntilesx=1&ntilesy=1&DEMresolution=54.43&basethick=1&zscale=3&fileformat=STLb&maptype=roadmap&gamma=1&transp=20&hsazi=315&hselev=45&map_lat=43.66893937649959&map_lon=-70.23630127729423&map_zoom=13,8
1406,11/1/20,12:15,3d print,Test,Test,3DP,Zurich,Switzerland,47.3769,8.5417,,trlat=47.03171357124068&trlon=9.111033474731443&bllat=46.784031605954794&bllon=8.879462277221677&DEM_name=USGS/NED&tilewidth=80&printres=0.4&ntilesx=1&ntilesy=1&DEMresolution=88.21&basethick=1&zscale=1.0&fileformat=STLb&maptype=roadmap&gamma=1&transp=20&hsazi=315&hselev=45&map_lat=46.88823399372339&map_lon=8.828489453100369&map_zoom=10,8
1414,11/18/20,12:14,Printing,Test,Test,3DP,Signal Mountain,United States,35.1226,-85.3438,,trlat=35.17888889649695&trlon=-85.31711120495042&bllat=35.038216394375524&bllon=-85.4301956236496&DEM_name=USGS/NED&tilewidth=80&printres=0.4&ntilesx=1&ntilesy=1&DEMresolution=51.55&basethick=1&zscale=3&fileformat=obj&maptype=roadmap&gamma=2.5&transp=0&hsazi=315&hselev=10&map_lat=35.15146362456189&map_lon=-85.4117622399836&map_zoom=11,8
1418,11/23/20,17:06,3d print,Test,Test,3DP,Ames,United States,42.0308,-93.6319,,trlat=43.44566761698278&trlon=-95.03913361869255&bllat=43.30103437838924&bllon=-95.23810822341093&DEM_name=USGS/NED&tilewidth=80&printres=0.4&ntilesx=1&ntilesy=1&DEMresolution=80.63&basethick=1&zscale=1.0&fileformat=STLb&maptype=roadmap&gamma=1&transp=20&hsazi=315&hselev=45&map_lat=43.389916679207424&map_lon=-95.16711670962596&map_zoom=12,8
1419,11/23/20,17:34,3d print,Test,Test,3DP,Lincoln,United States,40.8136,-96.7026,,trlat=41.11772148560303&trlon=-96.13849779434204&bllat=40.97012919387766&bllon=-96.38862272567751&DEM_name=USGS/NED&tilewidth=140&printres=0.4&ntilesx=1&ntilesy=1&DEMresolution=60.09&basethick=1&zscale=1.0&fileformat=STLb&maptype=roadmap&gamma=1&transp=80&hsazi=315&hselev=45&map_lat=41.02774804090055&map_lon=-96.32752840904752&map_zoom=12,8
1421,11/27/20,10:24,3d print,Test,Test,3DP,Eindhoven,Netherlands,51.4416,5.4697,"Eindhoven, Nederland",place=Eindhoven%2C%20Nederland&trlat=51.45553594325075&trlon=5.506477620930865&bllat=51.4223644578615&bllon=5.445607209823522&DEM_name=USGS/NED&tilewidth=80&printres=0.4&ntilesx=1&ntilesy=1&DEMresolution=21.16&basethick=1&zscale=1.0&fileformat=STLb&maptype=roadmap&gamma=1&transp=20&hsazi=315&hselev=45&map_lat=51.429678479519744&map_lon=5.461828318495279&map_zoom=13,8
1423,11/28/20,08:24,3d print,Test,Test,3DP,Bengaluru,India,12.9716,77.5946,,trlat=48.8608764826725&trlon=2.2983059418224228&bllat=48.855935365105054&bllon=2.2901806357735532&DEM_name=USGS/NED&tilewidth=80&printres=0.4&ntilesx=1&ntilesy=1&DEMresolution=2.98&basethick=1&zscale=1.0&fileformat=STLb&maptype=roadmap&gamma=1&transp=20&hsazi=315&hselev=45&map_lat=48.85589322012386&map_lon=2.2903379924723044&map_zoom=16,8
1427,12/2/20,07:44,3d print,Test,Test,3DP,Indore,India,22.7196,75.8577,"Tiger Hill, Darjeeling, West Bengal 734123, India",place=Tiger%20Hill%2C%20Darjeeling%2C%20West%20Bengal%20734123%2C%20India&trlat=27.009313854428488&trlon=88.31589246087016&bllat=26.98149268929258&bllon=88.28089276246963&DEM_name=USGS/NED&tilewidth=80&printres=0.4&ntilesx=1&ntilesy=1&DEMresolution=17.37&basethick=1&zscale=1.0&fileformat=STLb&maptype=roadmap&gamma=1&transp=40&hsazi=315&hselev=45&map_lat=27.00244064661097&map_lon=88.29684765927732&map_zoom=14,8
1440,11/23/19,22:02,suvenir,Crafts,Memento,3DP,Naperville,United States,41.7508,-88.1535,,(not set),7
1444,1/25/20,09:12,present,Crafts,Gift,3DP,As Pontes de Garcia Rodriguez,Spain,43.4526,-7.8522,,(not set),7
1453,3/4/20,15:30,Memento,Crafts,Memento,3DP,Middletown,United States,39.5151,-84.3983,,(not set),7
1464,4/20/20,15:41,X carve,Crafts,Carving,CNC,(not set),Ireland,0,0,,(not set),7
1465,4/24/20,12:47,present,Crafts,Gift,3DP,Nurtingen,Germany,48.6244,9.3469,,(not set),7
1484,6/4/20,22:19,ROUTING,Crafts,Carving,3DP,Wellington,New Zealand,-41.2865,174.7762,,(not set),7
1495,8/10/20,02:34,PRESENT,Crafts,Gift,3DP,Hamilton,New Zealand,-37.787,175.2793,,(not set),7
1504,10/15/20,07:38,X-Carve,Crafts,Carving,CNC,(not set),Germany,0,0,"Berglen, Deutschland",place=Berglen%2C%20Deutschland&trlat=48.89761481121929&trlon=9.538227836656636&bllat=48.82985816936048&bllon=9.39647487835888&DEM_name=USGS/NED&tilewidth=80&printres=0.4&ntilesx=1&ntilesy=1&DEMresolution=52&basethick=1&zscale=1.0&fileformat=STLb&maptype=roadmap&gamma=1&transp=20&hsazi=315&hselev=45&map_lat=48.86545617831562&map_lon=9.443662087488226&map_zoom=13,7
1507,10/20/20,15:21,carving,Crafts,Carving,CNC,Evendale,United States,39.2562,-84.418,,trlat=18.40680457229613&trlon=-67.12615399244366&bllat=18.31198299668207&bllon=-67.24147109869064&DEM_name=USGS/NED&tilewidth=80&printres=0.4&ntilesx=1&ntilesy=1&DEMresolution=60.94&basethick=1&zscale=1.0&fileformat=STLb&maptype=roadmap&gamma=1&transp=20&hsazi=315&hselev=45&map_lat=18.361364008413652&map_lon=-67.21797315958082&map_zoom=13,7
1522,12/13/20,18:00,Present,Crafts,Gift,3DP,Rancho Palos Verdes,United States,33.7445,-118.387,,trlat=37.96654445502885&trlon=-119.38605928662126&bllat=37.70570431784981&bllon=-119.84046125653093&DEM_name=USGS/NED&tilewidth=80&printres=0.4&ntilesx=1&ntilesy=1&DEMresolution=200&basethick=1&zscale=1.0&fileformat=STLb&maptype=roadmap&gamma=1&transp=100&hsazi=315&hselev=45&map_lat=37.79628352411253&map_lon=-119.46800337970687&map_zoom=11,7
1496,8/14/20,13:11,diorama,Design,3D Design,3DP,Bandung,Indonesia,-6.9175,107.6191,,(not set),7
1499,9/10/20,11:31,Artwork,Design,Art,3DP,Lincoln,United States,40.8136,-96.7026,,(not set),7
1431,9/18/19,21:09,Display,Education,Museum,3DP,(not set),Costa Rica,0,0,,(not set),7
1455,3/17/20,14:16,faculty,Education,Education,3DP,Belgrade,Serbia,44.7866,20.4489,,(not set),7
1456,4/1/20,13:06,School!,Education,Education,3DP,Tysons,United States,38.9187,-77.2311,,(not set),7
1493,7/25/20,13:55,Display,Education,Museum,3DP,Middletown,United States,39.5151,-84.3983,,(not set),7
1498,8/27/20,23:45,display,Education,Museum,3DP,Wauwatosa,United States,43.0495,-88.0076,,(not set),7
1502,9/21/20,09:14,exhibit,Education,Museum,3DP,Elk Grove Village,United States,42.0039,-87.9704,,(not set),7
1503,10/9/20,08:52,edu dem,Education,Education,3DP,Toccoa,United States,34.5773,-83.3324,,(not set),7
1511,11/16/20,04:01,display,Education,Museum,3DP,Rialto,United States,34.1064,-117.3703,"Anacortes, WA 98221, USA",place=Anacortes%2C%20WA%2098221%2C%20USA&trlat=50.13110792181901&trlon=-122.85427240289516&bllat=50.032851151006895&bllon=-122.99861816324062&DEM_name=USGS/NED&tilewidth=80&printres=0.4&ntilesx=1&ntilesy=1&DEMresolution=51.66&basethick=1&zscale=1.5&fileformat=STLb&maptype=roadmap&gamma=1&transp=20&hsazi=315&hselev=45&map_lat=50.099022291463605&map_lon=-122.94120816148586&map_zoom=12,7
1513,11/24/20,10:51,Studies,Education,Education,3DP,Stuttgart,Germany,48.7758,9.1829,,trlat=48.78348498660412&trlon=9.26559608242269&bllat=48.76637437012673&bllon=9.229933431360678&DEM_name=USGS/SRTMGL1_003&tilewidth=80&printres=0.5&ntilesx=1&ntilesy=1&DEMresolution=16.38&basethick=2&zscale=1.0&fileformat=STLb&maptype=roadmap&gamma=1&transp=20&hsazi=315&hselev=45&map_lat=48.774929678365424&map_lon=9.247764756891684&map_zoom=14,7
1439,11/22/19,17:55,Terrain,Map,Map,3DP,Pasadena,United States,29.6911,-95.2091,,(not set),7
1441,1/8/20,05:40,liedena,Map,Map,3DP,Mairena del Aljarafe,Spain,37.3509,-6.052,,(not set),7
1445,2/2/20,13:21,LaPalma,Map,Map,3DP,(not set),Spain,0,0,,(not set),7
1457,4/5/20,03:05,General,Map,Map,3DP,Sialkot,Pakistan,32.4945,74.5229,,(not set),7
1462,4/18/20,11:29,Khachik,Map,Map,3DP,Yerevan,Armenia,40.1794,44.5408,,(not set),7
1494,8/5/20,21:50,chungju,Map,Map,3DP,Chungju-si,South Korea,36.991,127.9259,,(not set),7
1516,11/28/20,12:24,Stocken,Map,Map,3DP,Solingen,Germany,51.1652,7.0671,,trlat=51.191468005883515&trlon=7.0050886498164555&bllat=51.189373440195546&bllon=7.00161373627898&DEM_name=JAXA/ALOS/AW3D30/V2_2&tilewidth=50&printres=0.4&ntilesx=1&ntilesy=1&DEMresolution=1.94&basethick=5&zscale=2&fileformat=STLb&maptype=roadmap&gamma=1&transp=20&hsazi=315&hselev=45&map_lat=51.19069139407073&map_lon=7.002863031007007&map_zoom=18,7
1432,9/19/19,05:17,for fun,Misc,Fun,3DP,Kathmandu,Nepal,27.7172,85.324,,(not set),7
1435,10/15/19,13:16,looking,Misc,Curious,3DP,Kingston,Jamaica,18.0179,-76.8099,,(not set),7
1437,11/13/19,11:21,project,Misc,Personal,3DP,Chicago,United States,41.8781,-87.6298,,(not set),7
1442,1/9/20,15:21,For fun,Misc,Fun,3DP,Krakow,Poland,50.0647,19.945,,(not set),7
1443,1/24/20,23:49,For fun,Misc,Fun,3DP,Sitka,United States,57.0531,-135.33,,(not set),7
1458,4/11/20,19:21,for fun,Misc,Fun,3DP,Kelowna,Canada,49.888,-119.496,,(not set),7
1463,4/20/20,10:11,private,Misc,Private,3DP,Alsdorf,Germany,50.8716,6.1648,,(not set),7
1466,4/26/20,15:32,Private,Misc,Private,3DP,Alsdorf,Germany,50.8716,6.1648,,(not set),7
1467,4/26/20,16:27,Private,Misc,Private,3DP,Alsdorf,Germany,50.8716,6.1648,,(not set),7
1470,5/13/20,12:54,for fun,Misc,Fun,3DP,Yokohama,Japan,35.4437,139.638,,(not set),7
1471,5/13/20,12:59,For fun,Misc,Fun,3DP,Yokohama,Japan,35.4437,139.638,,(not set),7
1474,5/21/20,08:59,For fun,Misc,Fun,3DP,Greensburg,United States,40.3015,-79.5389,,(not set),7
1475,5/21/20,18:01,For fun,Misc,Fun,3DP,Murrysville,United States,40.4284,-79.6975,,(not set),7
1479,5/27/20,18:27,For fun,Misc,Fun,3DP,Greenwood Village,United States,39.6172,-104.9508,,(not set),7
1480,5/28/20,03:12,for fun,Misc,Fun,3DP,Zhongli District,Taiwan,24.9722,121.2054,,(not set),7
1485,6/15/20,08:07,For fun,Misc,Fun,3DP,Chicago,United States,41.8781,-87.6298,,(not set),7
1486,6/16/20,08:05,for fun,Misc,Fun,3DP,Kathmandu,Nepal,27.7172,85.324,,(not set),7
1501,9/11/20,13:38,for fun,Misc,Fun,3DP,Gioia Tauro,Italy,38.4262,15.8989,,(not set),7
1505,10/15/20,11:55,Project,Misc,Personal,3DP,Ahmedabad,India,23.0225,72.5714,,trlat=13.820441432400091&trlon=94.40144595246021&bllat=10.543750243076536&bllon=91.12145480255792&DEM_name=JAXA/ALOS/AW3D30/V2_2&tilewidth=80&printres=0.4&ntilesx=1&ntilesy=1&DEMresolution=1784.79&basethick=1&zscale=1.0&fileformat=GeoTiff&maptype=roadmap&gamma=1&transp=50&hsazi=315&hselev=45&map_lat=10.23435996721006&map_lon=93.25034197907156&map_zoom=7,7
1509,11/8/20,03:40,for fun,Misc,Fun,3DP,Brussels,Belgium,50.8503,4.3517,"Alum Bay, Totland Bay, UK",place=Alum%20Bay%2C%20Totland%20Bay%2C%20UK&trlat=50.6786397518698&trlon=-1.5493785547449068&bllat=50.648777327771455&bllon=-1.5964897679521384&DEM_name=USGS/NED&tilewidth=80&printres=0.4&ntilesx=1&ntilesy=1&DEMresolution=16.65&basethick=1&zscale=1.0&fileformat=STLb&maptype=roadmap&gamma=1&transp=20&hsazi=315&hselev=45&map_lat=50.65887153554418&map_lon=-1.5785989867879757&map_zoom=14,7
1512,11/20/20,08:42,For fun,Misc,Fun,3DP,Vefsn Municipality,Norway,65.8112,13.2002,"Vefsn, Norge",place=Vefsn%2C%20Norge&trlat=44.746076744164014&trlon=-107.83344408340454&bllat=44.45273016368441&bllon=-108.40045591659546&DEM_name=USGS/NED&tilewidth=80&printres=0.4&ntilesx=1&ntilesy=1&DEMresolution=225.09&basethick=1&zscale=1.0&fileformat=STLb&maptype=roadmap&gamma=1&transp=20&hsazi=315&hselev=45&map_lat=65.86282229432769&map_lon=13.253071521198816&map_zoom=19,7
1518,12/2/20,14:06,funsies,Misc,Fun,3DP,Bozeman,United States,45.677,-111.0429,"Bozeman, MT, USA",place=Bozeman%2C%20MT%2C%20USA&trlat=45.94991264518936&trlon=-110.68179985351563&bllat=45.69086990746269&bllon=-111.05350395507814&DEM_name=USGS/NED&tilewidth=80&printres=0.4&ntilesx=1&ntilesy=1&DEMresolution=144.43&basethick=1&zscale=1.0&fileformat=obj&maptype=roadmap&gamma=1&transp=20&hsazi=315&hselev=45&map_lat=45.77811201979727&map_lon=-111.10867757082367&map_zoom=10,7
1519,12/2/20,16:30,funsies,Misc,Fun,3DP,Bozeman,United States,45.677,-111.0429,,trlat=45.30539637884169&trlon=-111.40792747802733&bllat=45.24773747772946&bllon=-111.4905538208008&DEM_name=USGS/NED&tilewidth=80&printres=0.4&ntilesx=1&ntilesy=1&DEMresolution=32.42&basethick=1&zscale=1.0&fileformat=obj&maptype=roadmap&gamma=1&transp=20&hsazi=315&hselev=45&map_lat=45.27354626122929&map_lon=-111.50779848387158&map_zoom=12,7
1520,12/10/20,10:45,Project,Misc,Personal,3DP,Country Knolls,United States,42.9151,-73.8051,,trlat=85.21593636506695&trlon=34.15253060000001&bllat=10.870044903554717&bllon=172.19940559999995&DEM_name=USGS/NED&tilewidth=90&printres=0.5&ntilesx=1&ntilesy=1&DEMresolution=57184.62&basethick=1&zscale=1.0&fileformat=STLb&maptype=roadmap&gamma=0.3&transp=100&hsazi=315&hselev=55&map_lat=45.24491492545157&map_lon=-84.2068444&map_zoom=0,7
1521,12/10/20,10:45,Project,Misc,Personal,3DP,Country Knolls,United States,42.9151,-73.8051,,trlat=85.21593636506695&trlon=34.15253060000001&bllat=10.870044903554717&bllon=172.19940559999995&DEM_name=USGS/NED&tilewidth=90&printres=0.5&ntilesx=1&ntilesy=1&DEMresolution=57184.62&basethick=1&zscale=1.0&fileformat=STLb&maptype=roadmap&gamma=0.3&transp=100&hsazi=315&hselev=55&map_lat=45.24491492545157&map_lon=-84.2068444&map_zoom=0,7
1523,12/13/20,20:21,fur fun,Misc,Fun,3DP,Meridian,United States,43.6121,-116.3915,"Northport, WA, USA",place=Northport%2C%20WA%2C%20USA&trlat=48.93361184083035&trlon=-117.74414076792411&bllat=48.88911893564093&bllon=-117.81286879765206&DEM_name=USGS/NED&tilewidth=80&printres=0.4&ntilesx=1&ntilesy=1&DEMresolution=25.19&basethick=1&zscale=1.0&fileformat=STLb&maptype=roadmap&gamma=1&transp=20&hsazi=315&hselev=45&map_lat=48.91189841907264&map_lon=-117.7808651267212&map_zoom=13,7
1433,9/20/19,21:56,playing,Recreation,Leisure,3DP,Adelaide,Australia,-34.9285,138.6007,,(not set),7
1446,2/8/20,14:17,SKI MAP,Recreation,Ski,3DP,(not set),United States,0,0,,(not set),7
1447,2/8/20,14:47,Ski map,Recreation,Ski,3DP,(not set),United States,0,0,,(not set),7
1448,2/8/20,18:54,Ski map,Recreation,Ski,3DP,(not set),United States,0,0,,(not set),7
1449,2/8/20,19:00,Ski Map,Recreation,Ski,3DP,(not set),United States,0,0,,(not set),7
1451,2/25/20,10:29,hunting,Recreation,Hunting,3DP,Knoxville,United States,35.9606,-83.9207,,(not set),7
1461,4/16/20,15:31,Ski Map,Recreation,Ski,3DP,(not set),United States,0,0,,(not set),7
1497,8/27/20,02:59,hicking,Recreation,Hiking,3DP,Neumarkt in der Oberpfalz,Germany,49.2773,11.4672,,(not set),7
1500,9/11/20,09:52,leisure,Recreation,Leisure,3DP,Orem,United States,40.2969,-111.6946,,(not set),7
1514,11/24/20,20:22,Tourisn,Recreation,Tourism,3DP,Adelaide,Australia,-34.9285,138.6007,"Naracoorte SA 5271, Australia",place=Naracoorte%20SA%205271%2C%20Australia&trlat=-37.07973849867087&trlon=140.79516669795504&bllat=-37.157760198978465&bllon=140.61251899287691&DEM_name=USGS/NED&tilewidth=80&printres=0.4&ntilesx=1&ntilesy=1&DEMresolution=81.16&basethick=1&zscale=1.0&fileformat=STLb&maptype=roadmap&gamma=1&transp=20&hsazi=315&hselev=45&map_lat=-37.18927568786009&map_lon=140.68976661250582&map_zoom=12,7
1515,11/25/20,22:49,hunting,Recreation,Hunting,3DP,Murrysville,United States,40.4284,-79.6975,"Delmont, PA 15626, USA",place=Delmont%2C%20PA%2015626%2C%20USA&trlat=40.42550076701083&trlon=-79.6049546270037&bllat=40.41553963786956&bllon=-79.62207293197157&DEM_name=USGS/NED&tilewidth=180&printres=0.4&ntilesx=1&ntilesy=1&DEMresolution=3.23&basethick=2&zscale=1.0&fileformat=STLb&maptype=roadmap&gamma=1&transp=20&hsazi=315&hselev=45&map_lat=40.417580693256625&map_lon=-79.61385710224155&map_zoom=15,7
1434,9/25/19,02:58,testing,Test,Test,3DP,(not set),Slovenia,0,0,,(not set),7
1436,11/8/19,23:48,Testing,Test,Test,3DP,Newfane,United States,42.9857,-72.6559,,(not set),7
1438,11/17/19,10:24,pratice,Test,Test,3DP,Bage,Brazil,-31.3285,-54.0923,,(not set),7
1450,2/23/20,03:53,testing,Test,Test,3DP,(not set),Hong Kong,0,0,,(not set),7
1452,2/25/20,20:42,Pratice,Test,Test,3DP,Jasper,United States,33.8312,-87.2775,,(not set),7
1454,3/16/20,12:21,testing,Test,Test,3DP,Dublin,Ireland,53.3498,-6.2603,,(not set),7
1459,4/12/20,10:23,TESTING,Test,Test,3DP,Nimes,France,43.8367,4.3601,,(not set),7
1460,4/14/20,15:52,TESTING,Test,Test,3DP,Athens,Greece,37.9838,23.7275,,(not set),7
1468,4/27/20,01:34,3d rint,Test,Test,3DP,Budapest,Hungary,47.4979,19.0402,,(not set),7
1472,5/15/20,23:33,testing,Test,Test,3DP,Kuala Lumpur,Malaysia,3.139,101.6869,,(not set),7
1473,5/17/20,08:49,testing,Test,Test,3DP,Dornbirn,Austria,47.4124,9.7438,,(not set),7
1476,5/26/20,14:32,try-out,Test,Test,3DP,Ouddorp,Netherlands,51.8091,3.9352,,(not set),7
1477,5/26/20,16:03,testing,Test,Test,3DP,Toledo,United States,41.6528,-83.5379,,(not set),7
1478,5/27/20,14:34,printed,Test,Test,3DP,Madrid,Spain,40.4168,-3.7038,,(not set),7
1488,7/9/20,20:00,testing,Test,Test,3DP,Ponta Delgada,Portugal,37.7394,-25.6687,,(not set),7
1489,7/14/20,04:16,testing,Test,Test,3DP,Vila Nova de Gaia,Portugal,41.1239,-8.6118,,(not set),7
1490,7/23/20,03:18,Testing,Test,Test,3DP,Kochi,India,9.9312,76.2673,,(not set),7
1491,7/24/20,20:22,CNC Fun,Test,Test,CNC,Smyrna,United States,39.2998,-75.6046,,(not set),7
1492,7/25/20,05:47,praline,Test,Test,3DP,Wil,Switzerland,47.4636,9.0479,,(not set),7
1506,10/16/20,17:34,3dprint,Test,Test,3DP,Mukwonago,United States,42.8667,-88.3334,,trlat=43.752557372550264&trlon=-110.75986128840246&bllat=43.70502065967338&bllon=-110.82238358053961&DEM_name=USGS/NED&tilewidth=80&printres=0.4&ntilesx=1&ntilesy=1&DEMresolution=12.59&basethick=0.5&zscale=2&fileformat=STLb&maptype=roadmap&gamma=1&transp=53&hsazi=315&hselev=45&map_lat=43.72356043503363&map_lon=-110.78654894823323&map_zoom=13,7
1508,10/30/20,11:54,3d prit,Test,Test,3DP,Nashville,United States,36.1627,-86.7816,,trlat=31.873049599507915&trlon=-106.4376706422721&bllat=31.74533824839277&bllon=-106.57808081968173&DEM_name=USGS/NED&tilewidth=180&printres=0.4&ntilesx=1&ntilesy=1&DEMresolution=29.54&basethick=1&zscale=2&fileformat=STLb&maptype=roadmap&gamma=1&transp=20&hsazi=315&hselev=45&map_lat=31.845144519149894&map_lon=-106.51354861376588&map_zoom=12,7
1510,11/9/20,03:09,Testing,Test,Test,3DP,Helsinki,Finland,60.1699,24.9384,,trlat=69.0582691008555&trlon=20.881449035667835&bllat=69.03524894193752&bllon=20.793635300659567&DEM_name=JAXA/ALOS/AW3D30/V2_2&tilewidth=80&printres=0.4&ntilesx=1&ntilesy=1&DEMresolution=17.53&basethick=1&zscale=1.0&fileformat=STLb&maptype=roadmap&gamma=1&transp=20&hsazi=315&hselev=45&map_lat=69.0485825464969&map_lon=20.831190697216435&map_zoom=13,7
1517,11/29/20,10:30,testing,Test,Test,3DP,Leeds,United Kingdom,53.8008,-1.5491,,trlat=53.81770369975548&trlon=-1.5964157406756896&bllat=53.76789017309191&bllon=-1.710093570179716&DEM_name=JAXA/ALOS/AW3D30/V2_2&tilewidth=50&printres=0.2&ntilesx=1&ntilesy=1&DEMresolution=29.97&basethick=0&zscale=3&fileformat=STLb&maptype=roadmap&gamma=1&transp=0&hsazi=315&hselev=45&map_lat=53.778396711240454&map_lon=-1.6272912074396695&map_zoom=14,7
1549,4/13/20,18:50,hobbie,Crafts,Hobby,3DP,Pozuelo de Alarcon,Spain,40.4475,-3.8074,,(not set),6
1552,5/2/20,18:06,puzzle,Crafts,Puzzle,3DP,(not set),Kosovo,0,0,,(not set),6
1553,5/13/20,04:08,my mom,Crafts,Gift,3DP,Turin,Italy,45.0703,7.6869,,(not set),6
1556,5/24/20,17:37,Inlaws,Crafts,Gift,3DP,(not set),United States,0,0,,(not set),6
1558,5/29/20,22:08,a gift,Crafts,Gift,3DP,Ottawa,Canada,45.4215,-75.6972,,(not set),6
1559,5/31/20,04:28,a gift,Crafts,Gift,3DP,(not set),Czechia,49.092,16.6293,,(not set),6
1560,6/15/20,11:28,friend,Crafts,Gift,3DP,Cody,United States,44.5263,-109.0565,,(not set),6
1561,6/15/20,11:30,freind,Crafts,Gift,3DP,Cody,United States,44.5263,-109.0565,,(not set),6
1562,6/19/20,09:53,Hobbie,Crafts,Hobby,3DP,Lauro de Freitas,Brazil,-12.8821,-38.3148,,(not set),6
1580,10/7/20,12:27,a gift,Crafts,Gift,3DP,Dresden,Germany,51.0504,13.7373,,(not set),6
1591,11/8/20,01:40,puzzle,Crafts,Puzzle,3DP,Kladno,Czechia,50.1417,14.1067,,trlat=50.097944294362264&trlon=17.297525982208594&bllat=50.03193890654874&bllon=17.194872478790625&DEM_name=JAXA/ALOS/AW3D30/V2_2&tilewidth=120&printres=0.2&ntilesx=1&ntilesy=1&DEMresolution=7.35&basethick=1&zscale=1.0&fileformat=STLb&maptype=roadmap&gamma=1&transp=20&hsazi=315&hselev=45&map_lat=50.064581517602214&map_lon=17.241736034698818&map_zoom=13,6
1594,11/11/20,07:30,puzzle,Crafts,Puzzle,3DP,Cape Town,South Africa,-33.9249,18.4241,,trlat=-33.927650397134315&trlon=18.476770034104977&bllat=-34.01306838595227&bllon=18.33501707580722&DEM_name=USGS/NED&tilewidth=80&printres=0.4&ntilesx=1&ntilesy=1&DEMresolution=65.5&basethick=1&zscale=1.0&fileformat=STLb&maptype=roadmap&gamma=1&transp=20&hsazi=315&hselev=45&map_lat=-33.96995643112168&map_lon=18.374479522973676&map_zoom=13,6
1602,12/3/20,18:36,plaque,Crafts,Trophy,3DP,Happy Valley-Goose Bay,Canada,53.3017,-60.3261,,trlat=62.58893516292774&trlon=-54.161408821415904&bllat=51.28537689615678&bllon=-68.49402604467869&DEM_name=USGS/NED&tilewidth=80&printres=0.4&ntilesx=1&ntilesy=1&DEMresolution=4362.46&basethick=1&zscale=1.0&fileformat=STLb&maptype=roadmap&gamma=1&transp=20&hsazi=315&hselev=45&map_lat=56.70773083130004&map_lon=-61.5144850111723&map_zoom=5,6
1605,12/13/20,23:15,Trophy,Crafts,Trophy,3DP,Denver,United States,39.7392,-104.9902,"Longs Peak, Colorado 80510, USA",place=Longs%20Peak%2C%20Colorado%2080510%2C%20USA&trlat=40.26181629354554&trlon=-105.60526309971732&bllat=40.24917412795517&bllon=-105.6237403905861&DEM_name=USGS/NED&tilewidth=80&printres=0.4&ntilesx=1&ntilesy=1&DEMresolution=7.86&basethick=1&zscale=1.0&fileformat=STLb&maptype=roadmap&gamma=1&transp=20&hsazi=315&hselev=45&map_lat=40.252449749989935&map_lon=-105.62159719382447&map_zoom=15,6
1606,12/14/20,14:49,puzzle,Crafts,Puzzle,3DP,Topeka,United States,39.0473,-95.6752,"Grand Canyon National Park, Arizona, USA",place=Grand%20Canyon%20National%20Park%2C%20Arizona%2C%20USA&trlat=37.07823568384863&trlon=-111.69079978674314&bllat=35.253485683757475&bllon=-113.95152290075681&DEM_name=USGS/NED&tilewidth=80&printres=0.4&ntilesx=1&ntilesy=1&DEMresolution=1017.04&basethick=1&zscale=1.0&fileformat=STLb&maptype=roadmap&gamma=1&transp=20&hsazi=315&hselev=45&map_lat=36.17781199029334&map_lon=-112.82116134374998&map_zoom=8,6
1531,12/20/19,16:19,3D Map,Design,3D Design,3DP,Fernley,United States,39.608,-119.2518,,(not set),6
1557,5/26/20,11:47,render,Design,3D Design,3DP,New York,United States,40.7128,-74.006,,(not set),6
1600,12/1/20,01:51,3d map,Design,3D Design,3DP,Trondheim Municipality,Norway,63.3687,10.3831,,trlat=55.33651878764774&trlon=15.290820556411386&bllat=54.97639312093513&bllon=14.604332404861067&DEM_name=USGS/NED&tilewidth=200&printres=0.4&ntilesx=1&ntilesy=1&DEMresolution=87.52&basethick=0&zscale=4&fileformat=STLb&maptype=roadmap&gamma=1&transp=20&hsazi=315&hselev=45&map_lat=55.26858577806393&map_lon=14.854469304817837&map_zoom=10,6
1525,9/16/19,22:54,school,Education,Education,3DP,(not set),Dominican Republic,0,0,,(not set),6
1526,10/6/19,14:49,school,Education,Education,3DP,Edinburg,United States,26.3017,-98.1633,,(not set),6
1527,10/10/19,15:08,school,Education,Education,3DP,Itzehoe,Germany,53.9318,9.5051,,(not set),6
1528,10/15/19,14:27,School,Education,Education,3DP,Beaverton,United States,45.4888,-122.8013,,(not set),6
1529,10/28/19,19:44,SCHOOL,Education,Education,3DP,Cambridge,United States,42.3736,-71.1097,,(not set),6
1530,12/5/19,17:59,school,Education,Education,3DP,McLean,United States,38.9339,-77.1773,,(not set),6
1532,1/7/20,19:05,school,Education,Education,3DP,Birdsboro,United States,40.2645,-75.8041,,(not set),6
1535,1/13/20,13:01,School,Education,Education,3DP,Paris,France,48.8566,2.3522,,(not set),6
1536,1/22/20,04:18,School,Education,Education,3DP,Roskilde,Denmark,55.6419,12.0878,,(not set),6
1538,1/29/20,18:09,School,Education,Education,3DP,Santa Clarita,United States,34.3917,-118.5426,,(not set),6
1539,1/29/20,18:39,school,Education,Education,3DP,Santa Clarita,United States,34.3917,-118.5426,,(not set),6
1540,1/31/20,09:55,school,Education,Education,3DP,Lehi,United States,40.3916,-111.8508,,(not set),6
1541,2/17/20,11:34,school,Education,Education,3DP,Paris,France,48.8566,2.3522,,(not set),6
1542,2/19/20,21:56,school,Education,Education,3DP,Gilroy,United States,37.003,-121.5566,,(not set),6
1543,2/24/20,09:15,school,Education,Education,3DP,Ludwigsburg,Germany,48.8941,9.1955,,(not set),6
1544,2/27/20,14:59,school,Education,Education,3DP,Fredericksburg,United States,38.3032,-77.4605,,(not set),6
1551,4/22/20,06:02,school,Education,Education,3DP,(not set),Kosovo,0,0,,(not set),6
1555,5/21/20,10:03,school,Education,Education,3DP,Amherst,United States,42.8615,-71.6254,,(not set),6
1563,7/1/20,09:51,school,Education,Education,3DP,Treviso,Italy,45.6669,12.243,,(not set),6
1566,7/9/20,17:19,school,Education,Education,3DP,Commerce City,United States,39.8083,-104.9339,,(not set),6
1567,7/14/20,14:13,school,Education,Education,3DP,Valencia,Spain,39.4699,-0.3763,,(not set),6
1569,7/20/20,17:33,sCHOOL,Education,Education,3DP,San Marcos,United States,33.1434,-117.1661,,(not set),6
1570,7/20/20,17:35,SCHOOL,Education,Education,3DP,San Marcos,United States,33.1434,-117.1661,,(not set),6
1575,9/2/20,12:26,school,Education,Education,3DP,(not set),United States,0,0,,(not set),6
1578,9/28/20,01:39,school,Education,Education,3DP,Palm Beach,United States,26.7056,-80.0364,,(not set),6
1579,10/3/20,17:55,School,Education,Education,3DP,New York,United States,40.7128,-74.006,,(not set),6
1583,10/28/20,08:11,school,Education,Education,3DP,Marfil,Mexico,20.9964,-101.2881,,trlat=21.016926991505226&trlon=-101.25327011413576&bllat=21.01619242642457&bllon=-101.25445207424164&DEM_name=USGS/NED&tilewidth=200&printres=0.3&ntilesx=1&ntilesy=1&DEMresolution=0.18&basethick=2&zscale=2.5&fileformat=STLb&manual=a&maptype=roadmap&gamma=1&transp=0&hsazi=315&hselev=45&map_lat=21.015606047474492&map_lon=-101.25338405162897&map_zoom=18,6
1584,10/29/20,13:15,school,Education,Education,3DP,Charlotte,United States,35.2271,-80.8431,"2010 The Plaza, Charlotte, NC 28205, USA",place=2010%20The%20Plaza%2C%20Charlotte%2C%20NC%2028205%2C%20USA&trlat=44.746076744164014&trlon=-107.86976119346619&bllat=44.45273016368441&bllon=-108.36413880653382&DEM_name=USGS/NED&tilewidth=80&printres=0.4&ntilesx=1&ntilesy=1&DEMresolution=196.25&basethick=1&zscale=1.0&fileformat=STLb&maptype=roadmap&gamma=1&transp=20&hsazi=315&hselev=45&map_lat=35.228732440704675&map_lon=-80.80760189479814&map_zoom=21,6
1585,10/31/20,07:10,school,Education,Education,3DP,Portsmouth,United Kingdom,50.8198,-1.088,"Sandown, UK",place=Sandown%2C%20UK&trlat=50.667128745426346&trlon=-1.1307821375316096&bllat=50.65494120487398&bllon=-1.1562738520091487&DEM_name=USGS/NED&tilewidth=60&printres=0.4&ntilesx=1&ntilesy=1&DEMresolution=12.02&basethick=1&zscale=1.0&fileformat=STLb&maptype=roadmap&gamma=1&transp=20&hsazi=315&hselev=45&map_lat=50.65510799668632&map_lon=-1.1603937250560237&map_zoom=14,6
1586,11/2/20,00:57,school,Education,Education,3DP,Anchorage,United States,61.2181,-149.9003,"Anchorage, AK, USA",place=Anchorage%2C%20AK%2C%20USA&trlat=44.73029783735288&trlon=-107.9332365638733&bllat=44.46867953790617&bllon=-108.30066343612671&DEM_name=USGS/NED&tilewidth=80&printres=0.4&ntilesx=1&ntilesy=1&DEMresolution=145.86&basethick=1&zscale=1.0&fileformat=STLb&maptype=roadmap&gamma=1&transp=20&hsazi=315&hselev=45&map_lat=61.155629637832924&map_lon=-149.60632499973627&map_zoom=12,6
1587,11/2/20,08:33,School,Education,Education,3DP,Sarajevo,Bosnia & Herzegovina,43.8563,18.4131,,trlat=45.28583163572048&trlon=19.6589277141571&bllat=42.54025963725867&bllon=15.674860274124143&DEM_name=USGS/NED&tilewidth=80&printres=0.4&ntilesx=1&ntilesy=1&DEMresolution=1600.07&basethick=1&zscale=1.0&fileformat=STLb&maptype=roadmap&gamma=1&transp=20&hsazi=315&hselev=45&map_lat=43.63976235042996&map_lon=17.75972486630074&map_zoom=8,6
1588,11/2/20,11:43,school,Education,Education,3DP,Lakewood,United States,39.7047,-105.0814,"Commons Park, 15th Street, Denver, CO, USA",place=Commons%20Park%2C%2015th%20Street%2C%20Denver%2C%20CO%2C%20USA&trlat=39.75959549077281&trlon=-105.00141495622411&bllat=39.754646735633344&bllon=-105.0086628437759&DEM_name=USGS/NED&tilewidth=60&printres=0.4&ntilesx=1&ntilesy=1&DEMresolution=4.14&basethick=1&zscale=1.0&fileformat=STLb&maptype=roadmap&gamma=1&transp=20&hsazi=315&hselev=45&map_lat=39.75712121321086&map_lon=-105.0050389&map_zoom=17,6
1589,11/3/20,13:15,school,Education,Education,3DP,Oxford,United States,39.507,-84.7452,"Oxford, OH, USA",place=Oxford%2C%20OH%2C%20USA&trlat=39.5106854844875&trlon=-84.73019210046522&bllat=39.507008428342154&bllon=-84.73625746911759&DEM_name=USGS/NED&tilewidth=80&printres=0.4&ntilesx=1&ntilesy=1&DEMresolution=2.61&basethick=1&zscale=1.0&fileformat=STLb&maptype=roadmap&gamma=1&transp=20&hsazi=315&hselev=45&map_lat=39.50844147829179&map_lon=-84.7343405837416&map_zoom=16,6
1595,11/17/20,08:44,school,Education,Education,3DP,Elma Center,United States,42.8298,-78.6361,,trlat=42.83967458829467&trlon=-78.57763075160713&bllat=42.804569867748256&bllon=-78.60626601155765&DEM_name=USGS/NED&tilewidth=80&printres=0.4&ntilesx=1&ntilesy=1&DEMresolution=11.71&basethick=3&zscale=5&fileformat=STLb&maptype=roadmap&gamma=1&transp=20&hsazi=315&hselev=45&map_lat=42.81659626366529&map_lon=-78.61889921252533&map_zoom=13,6
1596,11/18/20,03:44,school,Education,Education,3DP,Lakewood,United States,39.7047,-105.0814,"Denver, CO, USA",place=Denver%2C%20CO%2C%20USA&trlat=44.746076744164014&trlon=-107.8850175983429&bllat=44.45273016368441&bllon=-108.34888240165711&DEM_name=USGS/NED&tilewidth=80&printres=0.4&ntilesx=1&ntilesy=1&DEMresolution=184.14&basethick=1&zscale=1.0&fileformat=STLb&maptype=roadmap&gamma=1&transp=20&hsazi=315&hselev=45&map_lat=39.85548499398707&map_lon=-105.0983331569126&map_zoom=9,6
1597,11/23/20,21:26,school,Education,Education,3DP,Prince George,Canada,53.9171,-122.7497,,trlat=53.87681232056666&trlon=-122.71636861615916&bllat=53.83404548588858&bllon=-122.77986410313386&DEM_name=JAXA/ALOS/AW3D30/V2_2&tilewidth=80&printres=0.2&ntilesx=1&ntilesy=1&DEMresolution=10.45&basethick=2&zscale=1.0&fileformat=STLb&maptype=roadmap&gamma=1&transp=0&hsazi=315&hselev=45&map_lat=53.86654589416629&map_lon=-122.75742898934621&map_zoom=13,6
1601,12/1/20,03:52,school,Education,Education,3DP,Singen,Germany,47.7671,8.8722,Neuseeland,place=Neuseeland&trlat=-44.095459045935264&trlon=169.30431828671828&bllat=-44.59764525584232&bllon=168.48937076354167&DEM_name=USGS/NED&tilewidth=80&printres=0.4&ntilesx=1&ntilesy=1&DEMresolution=324.91&basethick=1&zscale=1.0&fileformat=STLb&maptype=roadmap&gamma=1&transp=20&hsazi=315&hselev=45&map_lat=-44.63684725482595&map_lon=169.54328115837123&map_zoom=9,6
1603,12/6/20,11:09,school,Education,Education,3DP,Kortrijk,Belgium,50.8195,3.2577,Iceland,place=Iceland&trlat=44.751928592304935&trlon=-107.80018111534119&bllat=44.45861163281566&bllon=-108.29913636512757&DEM_name=USGS/NED&tilewidth=80&printres=0.4&ntilesx=1&ntilesy=1&DEMresolution=198.05&basethick=1&zscale=1.0&fileformat=STLb&maptype=roadmap&gamma=1&transp=20&hsazi=315&hselev=45&map_lat=63.772079048649076&map_lon=-18.17411855735627&map_zoom=20,6
1533,1/8/20,16:48,EIGER1,Map,Map,3DP,Krakow,Poland,50.0647,19.945,,(not set),6
1537,1/23/20,12:49,botiga,Map,Map,3DP,(not set),Spain,0,0,,(not set),6
1545,3/17/20,14:36,ertwer,Map,Map,3DP,(not set),Iraq,0,0,,(not set),6
1546,4/1/20,06:21,MONACO,Map,Map,3DP,Saint-Germain-en-Laye,France,48.8989,2.0938,,(not set),6
1572,8/4/20,17:12,nevada,Map,Map,3DP,Carson City,United States,39.1638,-119.7674,,(not set),6
1581,10/22/20,03:18,JARDIN,Map,Landscape,3DP,(not set),France,0,0,,trlat=44.73213710091632&trlon=-107.93064018554688&bllat=44.466821412633806&bllon=-108.30325981445313&DEM_name=USGS/NED&tilewidth=80&printres=0.4&ntilesx=1&ntilesy=1&DEMresolution=147.92&basethick=1&zscale=1.0&fileformat=STLb&maptype=roadmap&gamma=1&transp=60&hsazi=90&hselev=45&map_lat=45.49867904427224&map_lon=4.909010504795539&map_zoom=18,6
1598,11/24/20,20:05,COLIMA,Map,Map,3DP,Tijuana,Mexico,32.5149,-117.0382,"Volc��n de Colima, Jalisco, Mexico",place=Volc%C3%A1n%20de%20Colima%2C%20Jalisco%2C%20Mexico&trlat=19.670168887025646&trlon=-103.44802519149782&bllat=19.42039812814938&bllon=-103.84472032852173&DEM_name=USGS/NED&tilewidth=80&printres=0.4&ntilesx=1&ntilesy=1&DEMresolution=208.15&basethick=1&zscale=1.0&fileformat=STLb&maptype=roadmap&gamma=1&transp=0&hsazi=315&hselev=45&map_lat=19.564478163072764&map_lon=-103.60587624591143&map_zoom=11,6
1548,4/9/20,15:31,Myself,Misc,Personal,3DP,Douglas,United Kingdom,54.1523,-4.4861,,(not set),6
1554,5/20/20,15:26,For mi,Misc,Personal,3DP,(not set),Romania,44.8913,28.7172,,(not set),6
1571,7/25/20,23:08,family,Misc,Personal,3DP,Cambridge,Canada,43.3616,-80.3144,,(not set),6
1574,8/13/20,14:48,thanks,Misc,Message,3DP,(not set),United States,0,0,,(not set),6
1577,9/18/20,13:32,Privat,Misc,Private,3DP,Frankfurt,Germany,50.1109,8.6821,,(not set),6
1524,9/15/19,11:33,skiing,Recreation,Ski,3DP,San Carlos,United States,37.5072,-122.2605,,(not set),6
1565,7/3/20,13:03,hiking,Recreation,Hiking,3DP,Moncton,Canada,46.0878,-64.7782,,(not set),6
1576,9/8/20,23:20,Hiking,Recreation,Hiking,3DP,Albuquerque,United States,35.0844,-106.6504,,(not set),6
1604,12/9/20,14:23,Hiking,Recreation,Hiking,3DP,Glendale,United States,34.1425,-118.2551,"Twin Peaks, Utah 84092, USA",place=Twin%20Peaks%2C%20Utah%2084092%2C%20USA&trlat=40.618094522721584&trlon=-111.61165870833318&bllat=40.50959523514225&bllon=-111.80250682043949&DEM_name=USGS/NED&tilewidth=80&printres=0.4&ntilesx=1&ntilesy=1&DEMresolution=80.81&basethick=1&zscale=1.0&fileformat=STLb&maptype=roadmap&gamma=1&transp=20&hsazi=315&hselev=45&map_lat=40.58217865742102&map_lon=-111.73575021433751&map_zoom=12,6
1568,7/19/20,04:59,thesis,Research,Research,3DP,Caserta,Italy,41.0723,14.3311,,(not set),6
1534,1/9/20,12:52,sample,Test,Test,3DP,Warsaw,Poland,52.2297,21.0122,,(not set),6
1547,4/5/20,03:34,tryout,Test,Test,3DP,(not set),Spain,0,0,,(not set),6
1550,4/17/20,05:09,sample,Test,Test,3DP,Virar,India,19.4564,72.7925,,(not set),6
1564,7/2/20,13:02,Sample,Test,Test,3DP,Chennai,India,13.0827,80.2707,,(not set),6
1653,5/17/20,20:27,Table,Crafts,Furniture,3DP,Knoxville,United States,41.3203,-93.0997,,(not set),5
1689,8/16/20,01:23,carve,Crafts,Carving,CNC,Las Vegas,United States,36.1699,-115.1398,,(not set),5
1705,10/17/20,10:26,hooby,Crafts,Hobby,3DP,Folsom,United States,38.678,-121.1761,,trlat=39.33188231410528&trlon=-119.7661947595077&bllat=39.14362568650381&bllon=-120.29787295927576&DEM_name=USGS/NED&tilewidth=80&printres=0.2&ntilesx=1&ntilesy=1&DEMresolution=114.76&basethick=1&zscale=1.25&fileformat=obj&maptype=roadmap&gamma=1&transp=10&hsazi=315&hselev=45&map_lat=38.951824278482405&map_lon=-120.08301549622665&map_zoom=10,5
1714,11/26/20,10:08,mould,Crafts,Crafts,3DP,Paris,France,48.8566,2.3522,"Mont Aiguille, 38930 Saint-Martin-de-Clelles, France",place=Mont%20Aiguille%2C%2038930%20Saint-Martin-de-Clelles%2C%20France&trlat=45.23907232396548&trlon=5.931144936175667&bllat=44.788620693494614&bllon=5.481815526427325&DEM_name=USGS/NED&tilewidth=80&printres=0.5&ntilesx=1&ntilesy=1&DEMresolution=221.37&basethick=1&zscale=3&fileformat=STLb&maptype=roadmap&gamma=1&transp=20&hsazi=315&hselev=45&map_lat=44.91424791885938&map_lon=5.736692633645246&map_zoom=10,5
1718,12/1/20,07:34,Craft,Crafts,Crafts,3DP,Interlochen,United States,44.6454,-85.7676,,trlat=46.29924481795791&trlon=-122.08275536817007&bllat=46.139828421824234&bllon=-122.31316069882804&DEM_name=USGS/NED&tilewidth=80&printres=0.4&ntilesx=1&ntilesy=1&DEMresolution=88.89&basethick=1&zscale=1.0&fileformat=STLb&maptype=roadmap&gamma=1&transp=20&hsazi=315&hselev=45&map_lat=46.201135259575004&map_lon=-122.17255214970999&map_zoom=11,5
1621,1/6/20,19:38,MODEL,Design,Modeling,3DP,(not set),St. Vincent & Grenadines,0,0,,(not set),5
1634,3/11/20,16:01,model,Design,Modeling,3DP,(not set),Canada,0,0,,(not set),5
1667,6/9/20,21:33,Archi,Design,Architecture,3DP,Wellington,New Zealand,-41.2865,174.7762,,(not set),5
1683,7/25/20,17:41,model,Design,Modeling,3DP,London,United Kingdom,51.5074,-0.1278,,(not set),5
1685,7/26/20,04:56,rhino,Design,3D Design,3DP,Moscow,Russia,55.7558,37.6173,,(not set),5
1690,8/17/20,19:11,model,Design,Modeling,3DP,Denver,United States,39.7392,-104.9902,,(not set),5
1618,12/2/19,01:40,class,Education,Education,3DP,Philadelphia,United States,39.9526,-75.1652,,(not set),5
1620,12/16/19,09:55,Study,Education,Education,3DP,Sao Paulo,Brazil,-23.5505,-46.6333,,(not set),5
1631,2/13/20,12:48,class,Education,Education,3DP,Blacksburg,United States,37.2296,-80.4139,,(not set),5
1635,3/22/20,09:42,study,Education,Education,3DP,Fortaleza,Brazil,-3.7327,-38.527,,(not set),5
1638,4/3/20,07:06,study,Education,Education,3DP,Lodz,Poland,51.7592,19.456,,(not set),5
1639,4/9/20,20:24,class,Education,Education,3DP,El Cerrito,United States,37.9161,-122.3108,,(not set),5
1640,4/10/20,05:12,study,Education,Education,3DP,Seriate,Italy,45.6854,9.7217,,(not set),5
1641,4/10/20,05:45,study,Education,Education,3DP,Seriate,Italy,45.6854,9.7217,,(not set),5
1657,5/26/20,02:25,study,Education,Education,3DP,(not set),Jordan,29.5321,35.0063,,(not set),5
1662,6/4/20,11:10,study,Education,Education,3DP,(not set),Ireland,0,0,,(not set),5
1669,6/13/20,16:57,corse,Education,Education,3DP,(not set),France,43.7852,4.1915,,(not set),5
1686,7/29/20,11:18,study,Education,Education,3DP,Sao Jose,Brazil,-27.5855,-48.6173,,(not set),5
1687,7/30/20,15:52,study,Education,Education,3DP,Chicago,United States,41.8781,-87.6298,,(not set),5
1691,8/30/20,17:35,study,Education,Education,3DP,Resende,Brazil,-22.4714,-44.4534,,(not set),5
1692,9/6/20,15:19,study,Education,Education,3DP,Angra do Heroismo,Portugal,38.6635,-27.2294,,(not set),5
1700,10/5/20,23:52,Class,Education,Education,3DP,Cambridge,United States,42.3736,-71.1097,,(not set),5
1709,10/29/20,03:47,Study,Education,Education,3DP,(not set),Slovenia,0,0,,trlat=60.40440451357072&trlon=5.3606060754225515&bllat=60.33073298587748&bllon=5.05684411634665&DEM_name=USGS/NED&tilewidth=80&printres=0.4&ntilesx=1&ntilesy=1&DEMresolution=83.81&basethick=1&zscale=1.0&fileformat=STLb&maptype=roadmap&gamma=1&transp=0&hsazi=315&hselev=45&map_lat=60.37341029244606&map_lon=5.219539762632648&map_zoom=12,5
1711,11/6/20,21:27,teach,Education,Teaching,3DP,Suwanee,United States,34.0515,-84.0713,,trlat=25.409496553029115&trlon=122.16453562181738&bllat=21.709807405581913&bllon=119.90722844068262&DEM_name=USGS/NED&tilewidth=80&printres=0.4&ntilesx=1&ntilesy=1&DEMresolution=1152.3&basethick=1&zscale=1.0&fileformat=STLb&maptype=roadmap&gamma=1&transp=40&hsazi=315&hselev=45&map_lat=29.22094342406132&map_lon=-237.30911426581176&map_zoom=6,5
1716,11/30/20,04:58,study,Education,Education,3DP,(not set),United States,0,0,"Bajegan, Kerman Province, Iran",place=Bajegan%2C%20Kerman%20Province%2C%20Iran&trlat=31.54849606890965&trlon=56.03824714355467&bllat=31.294191195514315&bllon=55.756264721679656&DEM_name=USGS/NED&tilewidth=80&printres=0.4&ntilesx=1&ntilesy=1&DEMresolution=134.06&basethick=1&zscale=1.0&fileformat=STLb&maptype=roadmap&gamma=1&transp=20&hsazi=315&hselev=45&map_lat=31.492470704014938&map_lon=55.81387497530378&map_zoom=11,5
1717,12/1/20,03:52,shool,Education,Education,3DP,Singen,Germany,47.7671,8.8722,,trlat=47.17363804485514&trlon=9.742549249928371&bllat=47.03342342708307&bllon=9.531961937460975&DEM_name=USGS/NED&tilewidth=80&printres=0.4&ntilesx=1&ntilesy=1&DEMresolution=79.93&basethick=1&zscale=1.0&fileformat=STLb&maptype=roadmap&gamma=1&transp=20&hsazi=315&hselev=45&map_lat=47.12022409394289&map_lon=9.605326577581392&map_zoom=12,5
1664,6/7/20,14:31,cacac,Map,Map,3DP,Tracadie-Sheila,Canada,47.5121,-64.9121,,(not set),5
1681,7/18/20,13:53,lasal,Map,Map,3DP,Moab,United States,38.5733,-109.5498,,(not set),5
1607,9/12/19,23:49,Hobby,Misc,Personal,3DP,Vellore,India,12.9165,79.1325,,(not set),5
1608,9/19/19,05:09,hobby,Misc,Personal,3DP,Kathmandu,Nepal,27.7172,85.324,,(not set),5
1609,9/19/19,05:25,hobby,Misc,Personal,3DP,Kathmandu,Nepal,27.7172,85.324,,(not set),5
1611,9/30/19,06:04,hobby,Misc,Personal,3DP,Toronto,Canada,43.6532,-79.3832,,(not set),5
1614,10/20/19,17:15,Hobby,Misc,Personal,3DP,Barcelona,Spain,41.3851,2.1734,,(not set),5
1615,10/28/19,10:54,Hobby,Misc,Personal,3DP,Lake Mary,United States,28.7589,-81.3178,,(not set),5
1616,10/28/19,15:40,hobby,Misc,Personal,3DP,Folsom,United States,38.678,-121.1761,,(not set),5
1617,11/10/19,11:55,hobby,Misc,Personal,3DP,McKinney,United States,33.1983,-96.6389,,(not set),5
1622,1/9/20,07:35,hobby,Misc,Personal,3DP,Edinburgh,United Kingdom,55.9533,-3.1883,,(not set),5
1623,1/13/20,11:59,hobby,Misc,Personal,3DP,Seattle,United States,47.6062,-122.3321,,(not set),5
1624,1/14/20,23:15,hobby,Misc,Personal,3DP,Seattle,United States,47.6062,-122.3321,,(not set),5
1625,1/15/20,18:27,hobby,Misc,Personal,3DP,Seattle,United States,47.6062,-122.3321,,(not set),5
1626,1/15/20,18:41,hobby,Misc,Personal,3DP,Seattle,United States,47.6062,-122.3321,,(not set),5
1630,2/12/20,16:19,hobby,Misc,Personal,3DP,Bath,United Kingdom,51.3811,-2.359,,(not set),5
1632,2/27/20,10:08,hobby,Misc,Personal,3DP,Granite Bay,United States,38.7632,-121.1638,,(not set),5
1633,3/4/20,10:59,Hobby,Misc,Personal,3DP,Flic en Flac,Mauritius,-20.279,57.3723,,(not set),5
1642,4/16/20,17:40,hobby,Misc,Personal,3DP,Medford,United States,42.3265,-122.8756,,(not set),5
1643,4/17/20,10:25,hobby,Misc,Personal,3DP,Medford,United States,42.3265,-122.8756,,(not set),5
1644,4/17/20,16:18,hobby,Misc,Personal,3DP,Medford,United States,42.3265,-122.8756,,(not set),5
1645,4/18/20,17:14,hobby,Misc,Personal,3DP,Medford,United States,42.3265,-122.8756,,(not set),5
1647,4/19/20,00:22,hobby,Misc,Personal,3DP,Medford,United States,42.3265,-122.8756,,(not set),5
1648,4/24/20,23:15,hobby,Misc,Personal,3DP,Eugene,United States,44.0521,-123.0868,,(not set),5
1649,4/29/20,22:30,Hobby,Misc,Personal,3DP,Medford,United States,42.3265,-122.8756,,(not set),5
1650,5/2/20,04:48,Hobby,Misc,Personal,3DP,Birmingham,United Kingdom,52.4862,-1.8904,,(not set),5
1651,5/2/20,20:39,hobby,Misc,Personal,3DP,Medford,United States,42.3265,-122.8756,,(not set),5
1652,5/15/20,13:51,Hobby,Misc,Personal,3DP,Barcelona,Spain,41.3851,2.1734,,(not set),5
1654,5/23/20,09:34,hobby,Misc,Personal,3DP,Santiago,Chile,-33.4489,-70.6693,,(not set),5
1655,5/24/20,02:18,Hobby,Misc,Personal,3DP,(not set),Germany,50.2064,9.2779,,(not set),5
1656,5/25/20,10:38,Hobby,Misc,Personal,3DP,Wachtersbach,Germany,50.255,9.2919,,(not set),5
1658,5/26/20,23:35,hobby,Misc,Personal,3DP,Perth,Australia,-31.9505,115.8605,,(not set),5
1660,5/30/20,03:31,Hobby,Misc,Personal,3DP,Schluchtern,Germany,50.3494,9.5255,,(not set),5
1661,6/2/20,11:21,hobby,Misc,Personal,3DP,Marlborough,United Kingdom,51.4201,-1.7271,,(not set),5
1665,6/8/20,18:31,hobby,Misc,Personal,3DP,Great Falls,United States,38.9982,-77.2883,,(not set),5
1666,6/9/20,12:12,hobby,Misc,Personal,3DP,Miami,United States,25.7617,-80.1918,,(not set),5
1668,6/13/20,08:55,hobby,Misc,Personal,3DP,Medford,United States,42.3265,-122.8756,,(not set),5
1673,6/22/20,19:25,Hobby,Misc,Personal,3DP,Overland,United States,38.7012,-90.3623,,(not set),5
1674,6/24/20,06:48,hobby,Misc,Personal,3DP,Southampton,United Kingdom,50.9097,-1.4044,,(not set),5
1675,6/25/20,11:04,hobby,Misc,Personal,3DP,Southampton,United Kingdom,50.9097,-1.4044,,(not set),5
1676,6/26/20,09:16,hobby,Misc,Personal,3DP,Dhaka,Bangladesh,23.8103,90.4125,,(not set),5
1677,6/27/20,20:22,Hobby,Misc,Personal,3DP,(not set),United States,0,0,,(not set),5
1678,6/29/20,07:13,hobby,Misc,Personal,3DP,(not set),Greece,0,0,,(not set),5
1679,7/3/20,12:50,hobby,Misc,Personal,3DP,Moncton,Canada,46.0878,-64.7782,,(not set),5
1680,7/5/20,22:16,hobby,Misc,Personal,3DP,Westminster,United States,39.8367,-105.0372,,(not set),5
1682,7/24/20,18:53,Hobby,Misc,Personal,3DP,Medford,United States,42.3265,-122.8756,,(not set),5
1684,7/25/20,21:37,hobby,Misc,Personal,3DP,San Diego,United States,32.7157,-117.1611,,(not set),5
1688,7/30/20,19:54,HOBBY,Misc,Personal,3DP,Denver,United States,39.7392,-104.9902,,(not set),5
1693,9/9/20,15:00,Hobby,Misc,Personal,3DP,Zurich,Switzerland,47.3769,8.5417,,(not set),5
1694,9/9/20,15:10,hobby,Misc,Personal,3DP,Zurich,Switzerland,47.3769,8.5417,,(not set),5
1695,9/15/20,17:56,hobby,Misc,Personal,3DP,Eugene,United States,44.0521,-123.0868,,(not set),5
1698,9/24/20,12:21,hobby,Misc,Personal,3DP,Loomis,United States,38.8213,-121.193,,(not set),5
1699,9/27/20,21:57,hobby,Misc,Personal,3DP,Eugene,United States,44.0521,-123.0868,,(not set),5
1701,10/9/20,14:47,hobby,Misc,Personal,3DP,Granite Bay,United States,38.7632,-121.1638,,(not set),5
1702,10/15/20,13:55,hobby,Misc,Personal,3DP,Granite Bay,United States,38.7632,-121.1638,,trlat=21.06569752925847&trlon=-155.95050712890628&bllat=20.55478846023818&bllon=-156.73236748046878&DEM_name=USGS/NED&tilewidth=80&printres=0.2&ntilesx=1&ntilesy=1&DEMresolution=203.48&basethick=1&zscale=1.0&fileformat=obj&maptype=roadmap&gamma=1&transp=20&hsazi=315&hselev=45&map_lat=20.64399025554099&map_lon=-156.55923137273328&map_zoom=10,5
1703,10/16/20,13:18,hobby,Misc,Personal,3DP,Granite Bay,United States,38.7632,-121.1638,,trlat=39.3054&trlon=-119.80969409179687&bllat=38.855&bllon=-120.032&DEM_name=USGS/NED&tilewidth=80&printres=0.4&ntilesx=1&ntilesy=1&DEMresolution=96.18&basethick=2&zscale=1.25&fileformat=obj&maptype=roadmap&gamma=1&transp=20&hsazi=315&hselev=45&map_lat=39.21706873030924&map_lon=-120.15494872025928&map_zoom=10,5
1704,10/16/20,15:28,hobby,Misc,Personal,3DP,Granite Bay,United States,38.7632,-121.1638,,trlat=39.3054&trlon=-119.809&bllat=38.855&bllon=-120.03&DEM_name=USGS/NED&tilewidth=80&printres=0.2&ntilesx=1&ntilesy=1&DEMresolution=47.81&basethick=1&zscale=1.25&fileformat=STLb&maptype=roadmap&gamma=1&transp=20&hsazi=315&hselev=45&map_lat=39.03017244657973&map_lon=-120.03221948674066&map_zoom=10,5
1706,10/17/20,10:27,hobby,Misc,Personal,3DP,Folsom,United States,38.678,-121.1761,,trlat=39.14362568650381&trlon=-119.7661947595077&bllat=38.96125223501849&bllon=-120.29787295927576&DEM_name=USGS/NED&tilewidth=80&printres=0.2&ntilesx=1&ntilesy=1&DEMresolution=115.06&basethick=1&zscale=1.25&fileformat=obj&maptype=roadmap&gamma=1&transp=10&hsazi=315&hselev=45&map_lat=38.951824278482405&map_lon=-120.08301549622665&map_zoom=10,5
1707,10/17/20,15:07,hobby,Misc,Personal,3DP,Weston-super-Mare,United Kingdom,51.3474,-2.9773,Cyprus,place=Cyprus&trlat=35.77326384945508&trlon=34.74794250848555&bllat=34.61068968357589&bllon=32.1930947241452&DEM_name=USGS/NED&tilewidth=80&printres=0.4&ntilesx=1&ntilesy=1&DEMresolution=1163.41&basethick=1&zscale=1.0&fileformat=STLb&maptype=roadmap&gamma=1&transp=20&hsazi=315&hselev=45&map_lat=34.91648310684771&map_lon=33.48013165342475&map_zoom=9,5
1708,10/21/20,13:00,hobby,Misc,Personal,3DP,Granite Bay,United States,38.7632,-121.1638,,trlat=39.325&trlon=-119.76&bllat=39.109&bllon=-120.309&DEM_name=USGS/NED&tilewidth=80&printres=0.2&ntilesx=1&ntilesy=1&DEMresolution=117.02&basethick=1&zscale=1.25&fileformat=obj&maptype=roadmap&gamma=1&transp=90&hsazi=315&hselev=45&map_lat=39.15391946870998&map_lon=-120.02931269466987&map_zoom=11,5
1713,11/24/20,04:27,hobby,Misc,Personal,3DP,San Juan,Puerto Rico,18.4655,-66.1057,Puerto Rico,place=Puerto%20Rico&trlat=18.386620249744414&trlon=-65.65829888628089&bllat=18.208911312964386&bllon=-65.93926852279569&DEM_name=USGS/NED&tilewidth=80&printres=0.2&ntilesx=1&ntilesy=1&DEMresolution=74.26&basethick=1&zscale=1.25&fileformat=obj&maptype=terrain&gamma=1&transp=20&hsazi=315&hselev=45&map_lat=18.257153878548017&map_lon=-65.79741041352266&map_zoom=11,5
1715,11/29/20,12:16,hobby,Misc,Personal,3DP,Zurich,Switzerland,47.3769,8.5417,"Neapel, Italien",place=Neapel%2C%20Italien&trlat=40.76381798317366&trlon=13.969427145574258&bllat=40.686022078883056&bllon=13.842741049382852&DEM_name=USGS/NED&tilewidth=60&printres=0.4&ntilesx=1&ntilesy=1&DEMresolution=71.35&basethick=1&zscale=1.0&fileformat=STLb&maptype=roadmap&gamma=1&transp=20&hsazi=315&hselev=45&map_lat=40.72328330827762&map_lon=13.917595093265032&map_zoom=12,5
1646,4/18/20,18:20,games,Recreation,Gaming,3DP,La Grange,United States,41.805,-87.8692,,(not set),5
1610,9/29/19,05:10,cr-10,Test,Test,3DP,Christchurch,New Zealand,-43.5321,172.6362,,(not set),5
1627,2/7/20,15:27,tests,Test,Test,3DP,Plainfield,United States,39.7042,-86.3994,,(not set),5
1628,2/11/20,12:10,print,Test,Test,3DP,(not set),United States,35.6859,-97.0042,,(not set),5
1629,2/11/20,13:05,print,Test,Test,3DP,(not set),United States,35.6859,-97.0042,,(not set),5
1663,6/5/20,19:35,Test2,Test,Test,3DP,Karlsruhe,Germany,49.0069,8.4037,,(not set),5
1670,6/18/20,14:35,print,Test,Test,3DP,Budapest,Hungary,47.4979,19.0402,,(not set),5
1712,11/11/20,19:47,test2,Test,Test,3DP,Sunnyvale,United States,37.3688,-122.0364,,trlat=-50.820636827131224&trlon=-72.81592381139285&bllat=-51.08018383593759&bllon=-73.2658082428295&DEM_name=USGS/NED&tilewidth=80&printres=0.4&ntilesx=1&ntilesy=1&DEMresolution=158.07&basethick=1&zscale=1.0&fileformat=STLb&maptype=roadmap&gamma=1&transp=20&hsazi=315&hselev=45&map_lat=-51.00831540751909&map_lon=-73.06009210132993&map_zoom=11,5
1721,12/11/20,23:31,dummy,Test,Test,3DP,Bengaluru,India,12.9716,77.5946,,trlat=44.89024939727573&trlon=-107.8184380180359&bllat=44.59763348953467&bllon=-108.28911920852661&DEM_name=USGS/NED&tilewidth=80&printres=0.4&ntilesx=1&ntilesy=1&DEMresolution=186.38&basethick=1&zscale=1.0&fileformat=STLb&maptype=roadmap&gamma=1&transp=20&hsazi=315&hselev=45&map_lat=44.66285528773752&map_lon=-108.10939689941407&map_zoom=11,5
1722,12/13/20,17:45,print,Test,Test,3DP,Sunrise,United States,26.167,-80.2566,"Morrocoy, 2055, Falc�_n, Venezuela",place=Morrocoy%2C%202055%2C%20Falc%C3%B3n%2C%20Venezuela&trlat=44.74110604719096&trlon=-107.9179765827179&bllat=44.4577566761454&bllon=-108.31592341728211&DEM_name=USGS/NED&tilewidth=80&printres=0.4&ntilesx=1&ntilesy=1&DEMresolution=157.97&basethick=1&zscale=1.0&fileformat=STLb&maptype=roadmap&gamma=1&transp=20&hsazi=315&hselev=45&map_lat=10.907813705504024&map_lon=-68.28297387663854&map_zoom=12,5
1723,9/20/19,11:44,Gift,Crafts,Gift,3DP,Albuquerque,United States,35.0844,-106.6504,,(not set),4
1725,10/5/19,03:19,gift,Crafts,Gift,3DP,Wilmington,United States,34.2104,-77.8868,,(not set),4
1734,11/8/19,22:06,Gift,Crafts,Gift,3DP,Saskatoon,Canada,52.1332,-106.6701,,(not set),4
1735,11/10/19,08:38,Gift,Crafts,Gift,3DP,Stoke-on-Trent,United Kingdom,53.0027,-2.1794,,(not set),4
1737,11/18/19,19:14,gift,Crafts,Gift,3DP,Aurora,United States,39.7294,-104.8319,,(not set),4
1739,12/5/19,11:09,Gift,Crafts,Gift,3DP,Denver,United States,39.7392,-104.9902,,(not set),4
1740,12/5/19,20:38,Gift,Crafts,Gift,3DP,Summerville,United States,33.0185,-80.1757,,(not set),4
1741,12/6/19,07:08,gift,Crafts,Gift,3DP,Fellbach,Germany,48.8216,9.2703,,(not set),4
1743,12/19/19,23:56,gift,Crafts,Gift,3DP,Bluffton,United States,40.8953,-83.8888,,(not set),4
1745,1/14/20,05:06,gift,Crafts,Gift,3DP,(not set),Italy,0,0,,(not set),4
1754,2/8/20,16:15,gift,Crafts,Gift,3DP,Burnsville,United States,35.9173,-82.301,,(not set),4
1756,2/15/20,19:02,Gift,Crafts,Gift,3DP,Laramie,United States,41.3114,-105.5911,,(not set),4
1758,2/20/20,16:04,gift,Crafts,Gift,3DP,Southlake,United States,32.9412,-97.1342,,(not set),4
1760,2/29/20,17:52,Gift,Crafts,Gift,3DP,Rio Rancho,United States,35.2328,-106.663,,(not set),4
1761,2/29/20,19:31,gift,Crafts,Gift,3DP,Rio Rancho,United States,35.2328,-106.663,,(not set),4
1762,3/1/20,10:13,gift,Crafts,Gift,3DP,Kaiserslautern,Germany,49.4401,7.7491,,(not set),4
1766,3/18/20,14:00,Gift,Crafts,Gift,3DP,Belpre,United States,39.274,-81.5729,,(not set),4
1767,3/25/20,23:21,gift,Crafts,Gift,3DP,South Salt Lake,United States,40.7188,-111.8883,,(not set),4
1768,3/26/20,21:30,gift,Crafts,Gift,3DP,South Salt Lake,United States,40.7188,-111.8883,,(not set),4
1776,4/24/20,06:27,gift,Crafts,Gift,3DP,Vienna,Austria,48.2082,16.3738,,(not set),4
1791,6/5/20,08:21,Gift,Crafts,Gift,3DP,Plain City,United States,41.298,-112.0861,,(not set),4
1794,6/10/20,13:27,Gift,Crafts,Gift,3DP,Devault,United States,40.0736,-75.5355,,(not set),4
1796,6/16/20,08:24,gift,Crafts,Gift,3DP,Austin,United States,30.2672,-97.7431,,(not set),4
1801,6/26/20,11:49,Gift,Crafts,Gift,3DP,Midland,United States,31.9973,-102.0779,,(not set),4
1807,7/22/20,11:03,gift,Crafts,Gift,3DP,Nimes,France,43.8367,4.3601,,(not set),4
1817,8/17/20,10:56,gift,Crafts,Gift,3DP,Montreal,Canada,45.5017,-73.5673,,(not set),4
1818,8/18/20,11:49,gift,Crafts,Gift,3DP,Albuquerque,United States,35.0844,-106.6504,,(not set),4
1822,9/3/20,21:47,Gift,Crafts,Gift,3DP,Mount Vernon,United States,38.7293,-77.1074,,(not set),4
1828,10/15/20,19:03,Gift,Crafts,Gift,3DP,Christiansburg,United States,37.1299,-80.4089,,trlat=44.73364945401735&trlon=-107.93094774551392&bllat=44.465293350961204&bllon=-108.30295225448609&DEM_name=USGS/NED&tilewidth=100&printres=0.4&ntilesx=1&ntilesy=1&DEMresolution=118.14&basethick=1&zscale=20&fileformat=STLb&maptype=roadmap&gamma=1&transp=40&hsazi=315&hselev=45&map_lat=43.77427526495711&map_lon=-75.21627236076579&map_zoom=16,4
1829,10/15/20,19:39,Gift,Crafts,Gift,3DP,Sacramento,United States,38.5816,-121.4944,"San Francisco, CA, USA",place=San%20Francisco%2C%20CA%2C%20USA&trlat=37.98566774533515&trlon=-121.77984390081394&bllat=37.307170297883246&bllon=-122.63265762151707&DEM_name=USGS/NED&tilewidth=100&printres=0.2&ntilesx=1&ntilesy=1&DEMresolution=301.05&basethick=1&zscale=3.5&fileformat=STLb&maptype=roadmap&gamma=1&transp=20&hsazi=315&hselev=45&map_lat=37.74262949445064&map_lon=-122.16299209417332&map_zoom=10,4
1836,10/26/20,22:52,gift,Crafts,Gift,3DP,Knik-Fairview,United States,61.5159,-149.612,,trlat=47.394736837794945&trlon=-116.49889005191326&bllat=47.33631145441926&bllon=-116.56452102429867&DEM_name=USGS/NED&tilewidth=100&printres=0.5&ntilesx=1&ntilesy=1&DEMresolution=24.79&basethick=2&zscale=1.0&fileformat=STLb&maptype=roadmap&gamma=1&transp=70&hsazi=315&hselev=45&map_lat=47.37728719138834&map_lon=-116.50994712330103&map_zoom=13,4
1838,11/7/20,21:32,gift,Crafts,Gift,3DP,Worcester,United States,42.2626,-71.8023,,trlat=41.402207482081856&trlon=-74.44327561346584&bllat=41.24751111131087&bllon=-74.72678331820063&DEM_name=USGS/NED&tilewidth=200&printres=0.4&ntilesx=1&ntilesy=1&DEMresolution=47.47&basethick=1&zscale=1.5&fileformat=STLb&maptype=roadmap&gamma=1&transp=20&hsazi=315&hselev=45&map_lat=41.307960068298414&map_lon=-74.61444166318137&map_zoom=12,4
1841,11/11/20,15:31,gift,Crafts,Gift,3DP,Rotterdam,Netherlands,51.9244,4.4777,,trlat=32.90853200463492&trlon=-16.627888229808757&bllat=32.6013316363507&bllon=-17.284369056246245&DEM_name=USGS/NED&tilewidth=80&printres=0.4&ntilesx=1&ntilesy=1&DEMresolution=307.6&basethick=1&zscale=1.0&fileformat=STLb&maptype=roadmap&gamma=1&transp=20&hsazi=315&hselev=45&map_lat=32.67155615059359&map_lon=-17.00213389205094&map_zoom=10,4
1844,11/21/20,13:57,Gift,Crafts,Gift,3DP,Delmar,United States,42.622,-73.8326,,trlat=66.1854464697685&trlon=-17.889619272783182&bllat=65.9598793032367&bllon=-18.445802134111307&DEM_name=MERIT/DEM/v1_0_3&tilewidth=80&printres=0.2&ntilesx=1&ntilesy=1&DEMresolution=62.95&basethick=1&zscale=1.0&fileformat=STLb&maptype=roadmap&gamma=1&transp=20&hsazi=315&hselev=45&map_lat=66.0009057750967&map_lon=-18.04530845555453&map_zoom=10,4
1846,11/28/20,19:54,gift,Crafts,Gift,3DP,Dublin,United States,40.0992,-83.1141,,trlat=38.51701767343977&trlon=-73.99548297185183&bllat=37.99786563882047&bllon=-75.38083610493423&DEM_name=USGS/NED&tilewidth=200&printres=0.4&ntilesx=1&ntilesy=1&DEMresolution=242.5&basethick=4&zscale=2.5&fileformat=obj&maptype=roadmap&gamma=1&transp=20&hsazi=90&hselev=45&map_lat=38.22748047303125&map_lon=-75.02158603068173&map_zoom=9,4
1848,11/30/20,20:28,gift,Crafts,Gift,3DP,Evanston,United States,41.2683,-110.9632,"Alta, UT, USA",place=Alta%2C%20UT%2C%20USA&trlat=40.60094621773512&trlon=-111.59430589295366&bllat=40.58139300221347&bllon=-111.62364076591471&DEM_name=USGS/NED&tilewidth=80&printres=0.4&ntilesx=1&ntilesy=1&DEMresolution=12.42&basethick=1&zscale=1.0&fileformat=STLb&maptype=roadmap&gamma=1&transp=20&hsazi=315&hselev=45&map_lat=40.58830335152216&map_lon=-111.60536844051818&map_zoom=15,4
1850,12/9/20,10:14,gift,Crafts,Gift,3DP,Boulder,United States,40.015,-105.2705,,trlat=39.229939280696485&trlon=-106.0994442112556&bllat=39.166942202307425&bllon=-106.20717066599042&DEM_name=USGS/NED&tilewidth=80&printres=0.4&ntilesx=1&ntilesy=1&DEMresolution=46.53&basethick=1&zscale=1.0&fileformat=STLb&maptype=roadmap&gamma=1&transp=20&hsazi=315&hselev=45&map_lat=39.15789234544894&map_lon=-106.138219394067&map_zoom=12,4
1852,12/9/20,15:35,gift,Crafts,Gift,3DP,Boulder,United States,40.015,-105.2705,,trlat=39.25401187307896&trlon=-106.07069617205961&bllat=39.161094892901396&bllon=-106.21223991805417&DEM_name=USGS/NED&tilewidth=300&printres=0.4&ntilesx=1&ntilesy=1&DEMresolution=16.3&basethick=0.5&zscale=2.5&fileformat=STLb&maptype=roadmap&gamma=0.3&transp=20&hsazi=315&hselev=55&map_lat=39.15554274817123&map_lon=-106.13011023098333&map_zoom=12,4
1785,5/19/20,19:16,maya,Design,3D Design,3DP,Wellington,New Zealand,-41.2865,174.7762,,(not set),4
1732,10/27/19,19:09,ediu,Education,Education,3DP,Sunshine Coast,Australia,-26.65,153.0667,,(not set),4
1736,11/11/19,10:18,ssss,Education,Education,3DP,(not set),Iran,0,0,,(not set),4
1769,3/28/20,18:42,home,Map,Property,3DP,Thun,Switzerland,46.758,7.628,,(not set),4
1777,4/25/20,10:14,home,Map,Property,3DP,Dublin,Ireland,53.3498,-6.2603,,(not set),4
1784,5/13/20,10:04,Home,Map,Property,3DP,Sopot,Poland,54.4416,18.5601,,(not set),4
1805,7/10/20,13:17,Topo,Map,Map,3DP,Denver,United States,39.7392,-104.9902,,(not set),4
1806,7/15/20,11:20,topo,Map,Map,3DP,Denver,United States,39.7392,-104.9902,,(not set),4
1808,7/24/20,01:44,mapa,Map,Map,3DP,Zabreh,Czechia,49.8826,16.8722,,(not set),4
1810,7/24/20,16:49,casa,Map,Property,3DP,Campinas,Brazil,-22.9329,-47.0738,,(not set),4
1813,7/30/20,11:20,home,Map,Property,3DP,(not set),United States,0,0,,(not set),4
1814,8/3/20,11:51,home,Map,Property,3DP,Zhukovskiy,Russia,55.5975,38.1133,,(not set),4
1816,8/8/20,01:50,home,Map,Property,3DP,Mason,United States,39.3601,-84.3099,,(not set),4
1819,8/20/20,19:10,topo,Map,Map,3DP,Denver,United States,39.7392,-104.9902,,(not set),4
1826,9/13/20,12:23,topo,Map,Map,3DP,Denver,United States,39.7392,-104.9902,,(not set),4
1833,10/25/20,19:42,ELBA,Map,Map,3DP,Brescia,Italy,45.5416,10.2118,"Monviso, Oncino, CN, Italia",place=Monviso%2C%20Oncino%2C%20CN%2C%20Italia&trlat=42.87521218094588&trlon=10.44536823315501&bllat=42.70117498554418&bllon=10.095403435658188&DEM_name=JAXA/ALOS/AW3D30/V2_2&tilewidth=200&printres=0.4&ntilesx=1&ntilesy=1&DEMresolution=143.17&basethick=1&zscale=1.0&fileformat=STLb&maptype=roadmap&gamma=1&transp=0&hsazi=90&hselev=45&map_lat=42.77601684684707&map_lon=10.300161979076202&map_zoom=12,4
1834,10/26/20,04:53,ELBA,Map,Map,3DP,Brescia,Italy,45.5416,10.2118,,trlat=42.874220272875995&trlon=10.446308964667498&bllat=42.70516339874927&bllon=10.100661629615034&DEM_name=JAXA/ALOS/AW3D30/V2_2&tilewidth=180&printres=0.2&ntilesx=1&ntilesy=1&DEMresolution=35.35&basethick=1&zscale=1.25&fileformat=STLb&maptype=roadmap&gamma=0.3&transp=0&hsazi=90&hselev=55&map_lat=42.78269677938308&map_lon=10.272479864273185&map_zoom=12,4
1835,10/26/20,08:24,ELBA,Map,Map,3DP,Brescia,Italy,45.5416,10.2118,,trlat=42.874220272875995&trlon=10.446308964667498&bllat=42.70516339874927&bllon=10.100661629615034&DEM_name=JAXA/ALOS/AW3D30/V2_2&tilewidth=100&printres=0.4&ntilesx=1&ntilesy=1&DEMresolution=56.56&basethick=1&zscale=1.25&fileformat=STLb&maptype=roadmap&gamma=0.3&transp=0&hsazi=90&hselev=55&map_lat=42.78269677938308&map_lon=10.272479864273185&map_zoom=12,4
1840,11/9/20,11:17,topo,Map,Map,3DP,Denver,United States,39.7392,-104.9902,,trlat=39.77892593485519&trlon=-104.97503630900259&bllat=39.77413983640049&bllon=-104.98126378366226&DEM_name=USGS/NED&tilewidth=80&printres=0.4&ntilesx=1&ntilesy=1&DEMresolution=2.67&basethick=1&zscale=1.0&fileformat=STLb&maptype=roadmap&gamma=1&transp=60&hsazi=315&hselev=45&map_lat=39.776322723942926&map_lon=-104.97863917544574&map_zoom=17,4
1755,2/8/20,18:03,play,Recreation,Leisure,3DP,(not set),United States,0,0,,(not set),4
1797,6/21/20,08:24,game,Recreation,Gaming,3DP,Concord,United States,35.4088,-80.5795,,(not set),4
1798,6/21/20,08:48,game,Recreation,Gaming,3DP,Concord,United States,35.4088,-80.5795,,(not set),4
1821,9/1/20,02:54,game,Recreation,Gaming,3DP,Barnaul,Russia,53.3498,83.7836,,(not set),4
1853,12/13/20,15:34,Game,Recreation,Gaming,3DP,Greensboro,United States,36.0726,-79.792,,trlat=35.74913374328556&trlon=-91.9534262826341&bllat=35.396162350882456&bllon=-92.58498279355938&DEM_name=USGS/NED&tilewidth=80&printres=0.4&ntilesx=1&ntilesy=1&DEMresolution=286.25&basethick=1&zscale=1.0&fileformat=STLb&maptype=roadmap&gamma=1&transp=20&hsazi=315&hselev=45&map_lat=35.56964369725322&map_lon=-92.32450142271674&map_zoom=11,4
1724,9/29/19,10:39,test,Test,Test,3DP,Krnov,Czechia,50.0906,17.7031,,(not set),4
1726,10/6/19,16:35,test,Test,Test,3DP,Burton upon Trent,United Kingdom,52.814,-1.6371,,(not set),4
1729,10/11/19,12:21,test,Test,Test,3DP,Hampton,United States,37.0299,-76.3452,,(not set),4
1738,11/19/19,02:29,test,Test,Test,3DP,(not set),Slovakia,0,0,,(not set),4
1742,12/6/19,12:22,test,Test,Test,3DP,Simi Valley,United States,34.2694,-118.7815,,(not set),4
1744,1/6/20,12:25,Test,Test,Test,3DP,Reutlingen,Germany,48.5069,9.2038,,(not set),4
1749,1/27/20,09:40,test,Test,Test,3DP,College Station,United States,30.628,-96.3344,,(not set),4
1750,2/2/20,13:17,test,Test,Test,3DP,Bratislava,Slovakia,48.1486,17.1077,,(not set),4
1752,2/6/20,04:47,Test,Test,Test,3DP,Belo Horizonte,Brazil,-19.9173,-43.9346,,(not set),4
1753,2/6/20,05:45,test,Test,Test,3DP,Belo Horizonte,Brazil,-19.9173,-43.9346,,(not set),4
1759,2/27/20,11:40,Test,Test,Test,3DP,Seymour,United States,35.8726,-83.774,,(not set),4
1765,3/16/20,06:04,test,Test,Test,3DP,Kdyne,Czechia,49.3902,13.0405,,(not set),4
1770,3/28/20,19:20,Test,Test,Test,3DP,Bergen Municipality,Norway,60.3341,5.381,,(not set),4
1771,3/29/20,15:25,test,Test,Test,3DP,Calgary,Canada,51.0447,-114.0719,,(not set),4
1772,3/31/20,05:17,test,Test,Test,3DP,Dubai,United Arab Emirates,25.2048,55.2708,,(not set),4
1773,4/19/20,06:22,Test,Test,Test,3DP,Valencia,Spain,39.4699,-0.3763,,(not set),4
1774,4/19/20,07:01,test,Test,Test,3DP,Valencia,Spain,39.4699,-0.3763,,(not set),4
1775,4/20/20,15:02,test,Test,Test,3DP,Valencia,Spain,39.4699,-0.3763,,(not set),4
1779,5/1/20,10:44,test,Test,Test,3DP,Valencia,Spain,39.4699,-0.3763,,(not set),4
1780,5/1/20,23:02,test,Test,Test,3DP,Park Forest Village,United States,40.8067,-77.9169,,(not set),4
1781,5/5/20,15:07,test,Test,Test,3DP,Aventura,United States,25.9565,-80.1392,,(not set),4
1782,5/9/20,04:30,Test,Test,Test,3DP,Tehran,Iran,35.6892,51.389,,(not set),4
1783,5/9/20,05:25,Test,Test,Test,3DP,Tehran,Iran,35.6892,51.389,,(not set),4
1786,5/20/20,20:21,Demo,Test,Test,3DP,(not set),Romania,44.8913,28.7172,,(not set),4
1787,5/21/20,15:20,test,Test,Test,3DP,Monterrey,Mexico,25.6866,-100.3161,,(not set),4
1792,6/5/20,19:27,Test,Test,Test,3DP,Karlsruhe,Germany,49.0069,8.4037,,(not set),4
1793,6/7/20,06:25,test,Test,Test,3DP,Belfast,United Kingdom,54.5973,-5.9301,,(not set),4
1799,6/22/20,05:35,Test,Test,Test,3DP,Wallisellen,Switzerland,47.4156,8.589,,(not set),4
1800,6/25/20,09:52,test,Test,Test,3DP,Irece,Brazil,-11.3034,-41.8558,,(not set),4
1802,7/3/20,00:56,test,Test,Test,3DP,Kathmandu,Nepal,27.7172,85.324,,(not set),4
1811,7/24/20,23:43,test,Test,Test,3DP,(not set),Philippines,0,0,,(not set),4
1812,7/27/20,01:10,test,Test,Test,3DP,Kathmandu,Nepal,27.7172,85.324,,(not set),4
1820,8/21/20,18:51,test,Test,Test,3DP,Oak Park,United States,41.885,-87.7845,,(not set),4
1823,9/8/20,04:11,test,Test,Test,3DP,Delhi,India,28.6863,77.2218,,(not set),4
1824,9/9/20,09:28,test,Test,Test,3DP,Prato,Italy,43.8777,11.1022,,(not set),4
1827,10/3/20,20:07,test,Test,Test,3DP,Durham,United States,35.994,-78.8986,,(not set),4
1830,10/19/20,02:21,test,Test,Test,3DP,Siheung-si,South Korea,37.3799,126.8031,,trlat=37.56373962493671&trlon=126.63788274724082&bllat=37.35225828445875&bllon=126.29197076756554&DEM_name=USGS/NED&tilewidth=80&printres=0.4&ntilesx=1&ntilesy=1&DEMresolution=153.02&basethick=1&zscale=1.0&fileformat=STLb&manual=inchon%20&maptype=roadmap&gamma=1&transp=40&hsazi=315&hselev=45&map_lat=37.39722561289595&map_lon=-233.325646362714&map_zoom=11,4
1831,10/19/20,03:48,Test,Test,Test,3DP,(not set),France,0,0,,trlat=46.27707399058488&trlon=6.557906662750228&bllat=46.0435536759318&bllon=6.112803017425508&DEM_name=JAXA/ALOS/AW3D30/V2_2&tilewidth=50&printres=0.35&ntilesx=1&ntilesy=1&DEMresolution=240.66&basethick=1&zscale=2&fileformat=STLb&maptype=roadmap&gamma=1&transp=20&hsazi=315&hselev=45&map_lat=46.28944987774101&map_lon=6.206834512282646&map_zoom=10,4
1832,10/19/20,11:01,test,Test,Test,3DP,(not set),United States,0,0,"Bridgman, MI, USA",place=Bridgman%2C%20MI%2C%20USA&trlat=41.950311421282656&trlon=-86.54291999363936&bllat=41.931764826616714&bllon=-86.58454296016731&DEM_name=USGS/NED&tilewidth=80&printres=0.4&ntilesx=1&ntilesy=1&DEMresolution=17.26&basethick=1&zscale=2.5&fileformat=STLb&maptype=roadmap&gamma=1&transp=50&hsazi=315&hselev=45&map_lat=41.93996307340574&map_lon=-86.57332150023504&map_zoom=15,4
1839,11/8/20,02:17,3d p,Test,Test,3DP,Dammam,Saudi Arabia,26.4207,50.0888,,trlat=25.720015141292233&trlon=37.246976080100744&bllat=25.70585159307636&bllon=37.230225936259835&DEM_name=USGS/NED&tilewidth=80&printres=0.3&ntilesx=1&ntilesy=1&DEMresolution=6.3&basethick=1&zscale=1.0&fileformat=STLb&maptype=hybrid&gamma=1&transp=20&hsazi=315&hselev=45&map_lat=25.700213964413216&map_lon=37.2372706325089&map_zoom=14,4
1842,11/11/20,19:30,test,Test,Test,3DP,Sunnyvale,United States,37.3688,-122.0364,"Torres del Paine National Park, Magallanes y la Ant��rtica Chilena, Chile",place=Torres%20del%20Paine%20National%20Park%2C%20Magallanes%20y%20la%20Ant%C3%A1rtica%20Chilena%2C%20Chile&trlat=44.746076744164014&trlon=-107.89200778428167&bllat=44.45273016368441&bllon=-108.34189221571833&DEM_name=USGS/NED&tilewidth=80&printres=0.4&ntilesx=1&ntilesy=1&DEMresolution=178.59&basethick=1&zscale=1.0&fileformat=STLb&maptype=roadmap&gamma=1&transp=20&hsazi=315&hselev=45&map_lat=-50.9966014352299&map_lon=-73.05689496163653&map_zoom=11,4
1845,11/26/20,20:22,test,Test,Test,3DP,Siheung-si,South Korea,37.3799,126.8031,,B % 8C % 80 % ED % 95 % 9C % EB % AF % BC % EA % B5 % AD % 20 % EC % B6 % A9 % EC % B2 % AD % EB % 82 % A8 % EB % 8F % 84 % 20 % EC % 95 % 84 % EC % 82 % B0 % EC % 8B % 9C % 20 % EC % 98 % 81 % EC % 9D % B8 % EB % A9 % B4 % 20 % EA % B5 % AC % EC % 84 % B1 % EB % A6 % AC % 20279-4 & trlat = 36.89950760227287 & trlon = 126.9466542302984 & bllat = 36.89787528909806 & bllon = 126.94421372743133 & DEM_name = USGS / NED & tilewidth = 80 & printres = 0.4 & basethick = 1 & zscale = 0.4 & ntilesx = 1 & ntilesy 1.0 & fileformat = STLb & maptype = roadmap & gamma = 1 & transp = 20 & hsazi = 315 & hselev = 45 & map_lat = 36.898633970452835 & map_lon = 126.94509706414307 & map_zoom = 19,4
1849,12/6/20,10:53,test,Test,Test,3DP,Allauch,France,43.3361,5.4826,"Marseille, France",place=Marseille%2C%20France&trlat=43.245061173334676&trlon=5.46425021462936&bllat=43.16998901249988&bllon=5.322497256331604&DEM_name=USGS/NED&tilewidth=80&printres=0.4&ntilesx=1&ntilesy=1&DEMresolution=57.6&basethick=1&zscale=1.0&fileformat=STLb&maptype=roadmap&gamma=1&transp=20&hsazi=315&hselev=45&map_lat=43.213681665544996&map_lon=5.405218370490248&map_zoom=13,4
1856,9/17/19,16:46,art,Art,Art,3DP,Santiago,Chile,-33.4489,-70.6693,,(not set),3
1858,9/29/19,18:27,art,Art,Art,3DP,Falmouth,United States,41.5532,-70.6086,,(not set),3
1865,11/8/19,21:36,Art,Art,Art,3DP,Saskatoon,Canada,52.1332,-106.6701,,(not set),3
1874,1/15/20,14:24,art,Art,Art,3DP,Courtenay,Canada,49.6841,-124.9904,,(not set),3
1916,4/7/20,11:43,art,Art,Art,3DP,Port St. Lucie,United States,27.2731,-80.3582,,(not set),3
1920,4/16/20,14:12,art,Art,Art,3DP,Reston,United States,38.9586,-77.357,,(not set),3
1947,6/19/20,04:14,Art,Art,Art,3DP,Strongsville,United States,41.3145,-81.8357,,(not set),3
1955,6/29/20,04:59,art,Art,Art,3DP,London,United Kingdom,51.5074,-0.1278,,(not set),3
1961,7/18/20,13:50,art,Art,Art,3DP,Moab,United States,38.5733,-109.5498,,(not set),3
1966,7/26/20,07:18,art,Art,Art,3DP,Helsinki,Finland,60.1699,24.9384,,(not set),3
1982,8/24/20,19:21,art,Art,Art,3DP,Fort Wayne,United States,41.0793,-85.1394,,(not set),3
1994,9/24/20,12:42,Art,Art,Art,3DP,Trieste,Italy,45.6495,13.7768,,(not set),3
1996,10/2/20,02:27,Art,Art,Art,3DP,Zurich,Switzerland,47.3769,8.5417,,(not set),3
2023,11/23/20,20:26,art,Art,Art,3DP,(not set),United States,0,0,"Longs Peak, Colorado 80510, USA",place=Longs%20Peak%2C%20Colorado%2080510%2C%20USA&trlat=40.263978844411845&trlon=-105.5931605389042&bllat=40.24016713719531&bllon=-105.62859877847863&DEM_name=USGS/NED&tilewidth=120&printres=0.4&ntilesx=1&ntilesy=1&DEMresolution=10.05&basethick=1&zscale=1.0&fileformat=obj&maptype=roadmap&gamma=1&transp=90&hsazi=315&hselev=45&map_lat=40.24983128603889&map_lon=-105.61987779938413&map_zoom=14,3
1857,9/18/19,12:44,cnc,Crafts,Carving,CNC,Portici,Italy,40.8141,14.3391,,(not set),3
1867,11/28/19,11:11,cnc,Crafts,Carving,CNC,Saint-Denis,France,48.9362,2.3574,,(not set),3
1869,12/3/19,09:41,CNC,Crafts,Carving,CNC,Burlington,United States,42.6781,-88.2762,,(not set),3
1873,12/18/19,23:15,cnc,Crafts,Carving,CNC,Nanaimo,Canada,49.1659,-123.9401,,(not set),3
1898,2/19/20,23:26,cnc,Crafts,Carving,CNC,Chicago,United States,41.8781,-87.6298,,(not set),3
1902,2/29/20,11:55,Cnc,Crafts,Carving,CNC,Cochrane,Canada,49.065,-81.0299,,(not set),3
1906,3/17/20,11:17,cnc,Crafts,Carving,CNC,Franklin,United States,35.1823,-83.3815,,(not set),3
1908,3/20/20,08:26,cnc,Crafts,Carving,CNC,(not set),United Kingdom,0,0,,(not set),3
1909,3/23/20,08:15,cnc,Crafts,Carving,CNC,Oslo Municipality,Norway,59.9142,10.7524,,(not set),3
1915,4/5/20,10:18,cnc,Crafts,Carving,CNC,Windsor,Canada,42.3149,-83.0364,,(not set),3
1919,4/14/20,17:13,CNC,Crafts,Carving,CNC,Newton,United States,35.6699,-81.2215,,(not set),3
1924,4/21/20,02:42,cnc,Crafts,Carving,CNC,Ontario,United States,34.0633,-117.6509,,(not set),3
1928,5/5/20,16:11,CNC,Crafts,Carving,CNC,Salem,United States,44.9429,-123.0351,,(not set),3
1930,5/9/20,04:29,cnc,Crafts,Carving,CNC,Ludwigshafen,Germany,49.4774,8.4452,,(not set),3
1931,5/10/20,02:57,cnc,Crafts,Carving,CNC,Mannheim,Germany,49.4875,8.466,,(not set),3
1932,5/19/20,13:36,cnc,Crafts,Carving,CNC,Marietta,United States,33.9526,-84.5499,,(not set),3
1944,6/16/20,23:51,cnc,Crafts,Carving,CNC,West Jordan,United States,40.6097,-111.9391,,(not set),3
1957,7/5/20,15:16,cnc,Crafts,Carving,CNC,Lehigh Acres,United States,26.6254,-81.6248,,(not set),3
1963,7/22/20,13:10,CNC,Crafts,Carving,CNC,Johnston,United States,41.8205,-71.5126,,(not set),3
1969,8/2/20,18:31,cnc,Crafts,Carving,CNC,Las Cruces,United States,32.3199,-106.7637,,(not set),3
1972,8/10/20,12:13,cnc,Crafts,Carving,CNC,Utica,United States,43.1009,-75.2327,,(not set),3
1979,8/20/20,12:34,cnc,Crafts,Carving,CNC,Boulder,United States,40.015,-105.2705,,(not set),3
1989,9/8/20,15:42,cnc,Crafts,Carving,CNC,Washington,United States,38.9072,-77.0369,,(not set),3
1990,9/11/20,08:36,cnc,Crafts,Carving,CNC,Delft,Netherlands,52.0116,4.3571,,(not set),3
1993,9/24/20,09:53,CNC,Crafts,Carving,CNC,Phoenix,United States,33.4484,-112.074,,(not set),3
2004,10/20/20,03:11,cnc,Crafts,Carving,CNC,Thimphu,Bhutan,27.4728,89.6393,"Phobjikha Valley, Wangdue Phodrang, Bhutan",place=Phobjikha%20Valley%2C%20Wangdue%20Phodrang%2C%20Bhutan&trlat=44.741106888040356&trlon=-107.91797539528162&bllat=44.45775582601873&bllon=-108.31592460471839&DEM_name=USGS/NED&tilewidth=80&printres=0.4&ntilesx=1&ntilesy=1&DEMresolution=157.97&basethick=1&zscale=1.0&fileformat=STLb&maptype=roadmap&gamma=1&transp=20&hsazi=315&hselev=45&map_lat=27.46587065825475&map_lon=90.18029060000003&map_zoom=17,3
2005,10/21/20,18:16,cnc,Crafts,Carving,CNC,Folsom,United States,38.678,-121.1761,,trlat=20.705&trlon=-154.181&bllat=18.778&bllon=-156.783&DEM_name=USGS/NED&tilewidth=80&printres=0.2&ntilesx=1&ntilesy=1&DEMresolution=681.86&basethick=1&zscale=1.25&fileformat=obj&maptype=roadmap&gamma=1&transp=20&hsazi=315&hselev=45&map_lat=20.35008335063411&map_lon=-156.86657505725157&map_zoom=8,3
2006,10/24/20,04:59,Cnc,Crafts,Carving,CNC,(not set),Oman,0,0,,trlat=25.406712447036472&trlon=59.48084106825581&bllat=21.624043154879857&bllon=55.81599036388393&DEM_name=JAXA/ALOS/AW3D30/V2_2&tilewidth=80&printres=0.4&ntilesx=1&ntilesy=1&DEMresolution=1871.44&basethick=1&zscale=1.0&fileformat=STLb&maptype=roadmap&gamma=1&transp=0&hsazi=315&hselev=45&map_lat=23.923367195983356&map_lon=57.40695635651099&map_zoom=6,3
2010,10/26/20,10:20,cnc,Crafts,Carving,CNC,Folsom,United States,38.678,-121.1761,,trlat=21.86882392867448&trlon=-155.9093849221932&bllat=20.33150011129474&bllon=-158.40082092683187&DEM_name=USGS/NED&tilewidth=80&printres=0.2&ntilesx=1&ntilesy=1&DEMresolution=647.16&basethick=1&zscale=1.25&fileformat=obj&maptype=roadmap&gamma=1&transp=20&hsazi=315&hselev=45&map_lat=20.945670734976733&map_lon=-157.26221962373128&map_zoom=9,3
2011,10/26/20,12:51,cnc,Crafts,Carving,CNC,Folsom,United States,38.678,-121.1761,,trlat=20.4046502397014&trlon=-154.62886844795864&bllat=19.583890973051385&bllon=-156.24395881813686&DEM_name=USGS/NED&tilewidth=80&printres=0.2&ntilesx=1&ntilesy=1&DEMresolution=422.55&basethick=1&zscale=1.25&fileformat=obj&maptype=roadmap&gamma=1&transp=20&hsazi=315&hselev=45&map_lat=19.929720128749064&map_lon=-155.63366675946642&map_zoom=9,3
2025,11/24/20,20:10,CNC,Crafts,Carving,CNC,Tijuana,Mexico,32.5149,-117.0382,"Nevado de Colima, Jalisco, Mexico",place=Nevado%20de%20Colima%2C%20Jalisco%2C%20Mexico&trlat=19.573193478216915&trlon=-103.59505316085817&bllat=19.551378637263934&bllon=-103.62104555435181&DEM_name=USGS/NED&tilewidth=80&printres=0.4&ntilesx=1&ntilesy=1&DEMresolution=13.64&basethick=1&zscale=1.0&fileformat=STLb&maptype=roadmap&gamma=1&transp=0&hsazi=315&hselev=45&map_lat=19.56032888681367&map_lon=-103.60662716292612&map_zoom=14,3
2039,12/5/20,00:48,CNC,Crafts,Carving,CNC,Preston,United Kingdom,53.7632,-2.7031,,trlat=53.31533640082043&trlon=-1.8021416856942785&bllat=53.192096282299175&bllon=-2.0882439806161535&DEM_name=JAXA/ALOS/AW3D30/V2_2&tilewidth=160&printres=0.4&ntilesx=1&ntilesy=1&DEMresolution=47.74&basethick=5&zscale=5&fileformat=STLb&maptype=roadmap&gamma=1&transp=20&hsazi=315&hselev=45&map_lat=53.25381619593537&map_lon=-1.945192833155216&map_zoom=12,3
2042,12/10/20,07:53,CNC,Crafts,Carving,CNC,Palmyra,United States,40.0071,-75.0282,,trlat=44.746076744164014&trlon=-107.83085128135681&bllat=44.45273016368441&bllon=-108.40304871864319&DEM_name=USGS/NED&tilewidth=80&printres=0.4&ntilesx=1&ntilesy=1&DEMresolution=227.15&basethick=2&zscale=1.0&fileformat=STLb&maptype=roadmap&gamma=1&transp=0&hsazi=315&hselev=45&map_lat=43.86482386752378&map_lon=-76.22745997507054&map_zoom=14,3
2044,12/10/20,07:53,CNC,Crafts,Carving,CNC,Palmyra,United States,40.0071,-75.0282,,trlat=44.746076744164014&trlon=-107.83085128135681&bllat=44.45273016368441&bllon=-108.40304871864319&DEM_name=USGS/NED&tilewidth=80&printres=0.4&ntilesx=1&ntilesy=1&DEMresolution=227.15&basethick=2&zscale=1.0&fileformat=STLb&maptype=roadmap&gamma=1&transp=0&hsazi=315&hselev=45&map_lat=43.86482386752378&map_lon=-76.22745997507054&map_zoom=14,3
1862,10/27/19,19:08,edu,Education,Education,3DP,Sunshine Coast,Australia,-26.65,153.0667,,(not set),3
1974,8/17/20,15:19,edu,Education,Education,3DP,Toccoa,United States,34.5773,-83.3324,,(not set),3
2020,11/18/20,06:12,uni,Education,College,3DP,Stuttgart,Germany,48.7758,9.1829,,trlat=48.8159338318558&trlon=9.244527321884407&bllat=48.79883427950963&bllon=9.208864670822395&DEM_name=USGS/SRTMGL1_003&tilewidth=80&printres=0.5&ntilesx=1&ntilesy=1&DEMresolution=16.37&basethick=2&zscale=1.0&fileformat=STLb&maptype=roadmap&gamma=1&transp=20&hsazi=315&hselev=45&map_lat=48.80738405568272&map_lon=9.226695996353401&map_zoom=14,3
2021,11/22/20,07:17,sdf,Education,Education,3DP,(not set),Albania,0,0,,trlat=44.746076744164014&trlon=-105.03009935684206&bllat=43.31651359523626&bllon=-108.36383482284546&DEM_name=USGS/NED&tilewidth=80&printres=0.4&ntilesx=1&ntilesy=1&DEMresolution=1336.23&basethick=4&zscale=1.5&fileformat=GeoTiff&maptype=roadmap&gamma=1.2&transp=0&hsazi=270&hselev=35&map_lat=44.188904747365584&map_lon=-107.30466343023043&map_zoom=9,3
1889,2/3/20,12:46,map,Map,Map,3DP,Blacksburg,United States,37.2296,-80.4139,,(not set),3
1910,3/25/20,10:00,map,Map,Map,3DP,(not set),Georgia,41.5226,45.043,,(not set),3
1926,4/28/20,23:05,map,Map,Map,3DP,Lemon Grove,United States,32.7425,-117.0314,,(not set),3
1936,5/28/20,00:49,map,Map,Map,3DP,(not set),United States,0,0,,(not set),3
2031,11/30/20,10:24,map,Map,Map,3DP,Catania,Italy,37.5079,15.083,"97018 Scicli RG, Italia",place=97018%20Scicli%20RG%2C%20Italia&trlat=36.79595181581517&trlon=14.715798235123039&bllat=36.787876487158&bllon=14.705692900900749&DEM_name=USGS/NED&tilewidth=80&printres=0.4&ntilesx=1&ntilesy=1&DEMresolution=4.51&basethick=1&zscale=1.0&fileformat=STLb&maptype=roadmap&gamma=1&transp=20&hsazi=315&hselev=45&map_lat=36.79184986454833&map_lon=14.712167138789786&map_zoom=16,3
1954,6/23/20,18:37,d&D,Recreation,Gaming,3DP,Overland,United States,38.7012,-90.3623,,(not set),3
1950,6/21/20,09:05,try,Test,Test,3DP,Rome,Italy,41.9028,12.4964,,(not set),3
